# Supplementary material
Source: publisher figshare collection journal article supplement (https://acs.figshare.com/ndownloader/files/4105162)
Supplement: Supplementary file 1 [file 4105162]

# Asymmetric Iodolactonization Utilizing Chiral Squaramides

Jørn E. Tungen, Jens M. J. Nolsøe and Trond V. Hansen\*

*School of Pharmacy, Department of Pharmaceutical Chemistry, University of Oslo,  
P.O. Box 1068 Blindern, N-0316, Oslo, Norway.*

\*Phone: +47 2285 7450

\*Fax: +47 2285 6067

\*E-mail: [t.v.hansen@farmasi.uio.no](mailto:t.v.hansen@farmasi.uio.no)

## Supporting Information

### Table of Contents:

|                                                                                                                 |     |
|-----------------------------------------------------------------------------------------------------------------|-----|
| General Information.....                                                                                        | S1  |
| Preparation of Catalysts.....                                                                                   | S2  |
| NMR Spectra of Catalysts <b>5a</b> , <b>5b</b> , <b>6a</b> and <b>6b</b> (Figures S1-S8).....                   | S5  |
| MS Spectra of Catalysts <b>5a</b> , <b>5b</b> , <b>6a</b> and <b>6b</b> (Figures S9-S16).....                   | S9  |
| Preparation of Starting Materials.....                                                                          | S13 |
| NMR Spectra of Starting Materials <b>1a-1h</b> , <b>3a</b> and <b>3b</b> (Figures S17-S36).....                 | S16 |
| Enantioselective Iodolactonization utilizing Chiral Squaramides.....                                            | S26 |
| NMR Spectra of Chiral Iodolactones <b>2a-2h</b> , <b>4a</b> and <b>4b</b> (Figures S37-S56).....                | S31 |
| MS Spectra of Chiral Iodolactones <b>2a-2h</b> , <b>4a</b> and <b>4b</b> (Figures S57-S76).....                 | S41 |
| HPLC and GLC Chromatograms of Chiral Iodolactones <b>2a-2h</b> , <b>4a</b> and <b>4b</b> (Figures S77-S98)..... | S51 |
| References.....                                                                                                 | S62 |

### General Information

All commercially available reagents and solvents were used in the form they were supplied without any further purification. The stated yields are based on isolated material. The melting points are uncorrected. Thin layer chromatography was performed on silica gel 60 F<sub>254</sub> aluminum-backed plates fabricated by Merck. Flash column chromatography was performed on silica gel 60 (40-63  $\mu$ m) fabricated by Merck. NMR spectra were recorded on a Bruker AVII-400 or a Bruker DPX-300 spectrometer at 400 MHz or 300 MHz respectively for <sup>1</sup>H NMR and at 100 MHz or 75 MHz respectively for <sup>13</sup>C NMR. Coupling constants (*J*) are reported in hertz and chemical shifts are reported in parts per million ( $\delta$ ) relative to the central residual protium solvent resonance in <sup>1</sup>H NMR (CDCl<sub>3</sub> =  $\delta$  7.27, DMSO-*d*<sub>6</sub> =  $\delta$  2.50 and TFA-*d* =  $\delta$  11.50) and the central carbon solvent resonance in <sup>13</sup>C NMR (CDCl<sub>3</sub> =  $\delta$  77.00 ppm and DMSO-*d*<sub>6</sub> =  $\delta$  39.43). Mass spectra were recorded at 70 eV on Waters Prospec Q spectrometer using EI as the method of ionization. High resolution mass spectra were recorded on Waters Prospec Q spectrometer using EI as the method of ionization. Optical rotations were measured using a 1 mL cell with a 1.0 dm path length on a Perkin Elmer 341 polarimeter. Determination of enantiomeric excess was performed by HPLC on an Agilent Technologies 1200 Series instrument with diode array detector set at 254 nm and equipped with a chiral stationary phase (Chiralpak AD-H 5  $\mu$ m 4.6 x 250 mm), applying the conditions stated. Alternatively, determination of enantiomeric excess was performed by GLC on a Varian 3380 instrument with split (1:30) injection, FID detector and equipped with a chiral stationary phase (Chiraldex G-TA 0.12  $\mu$ m 0.25 mm x 30 m), applying the conditions stated.

## Preparation of Squaramide Catalysts

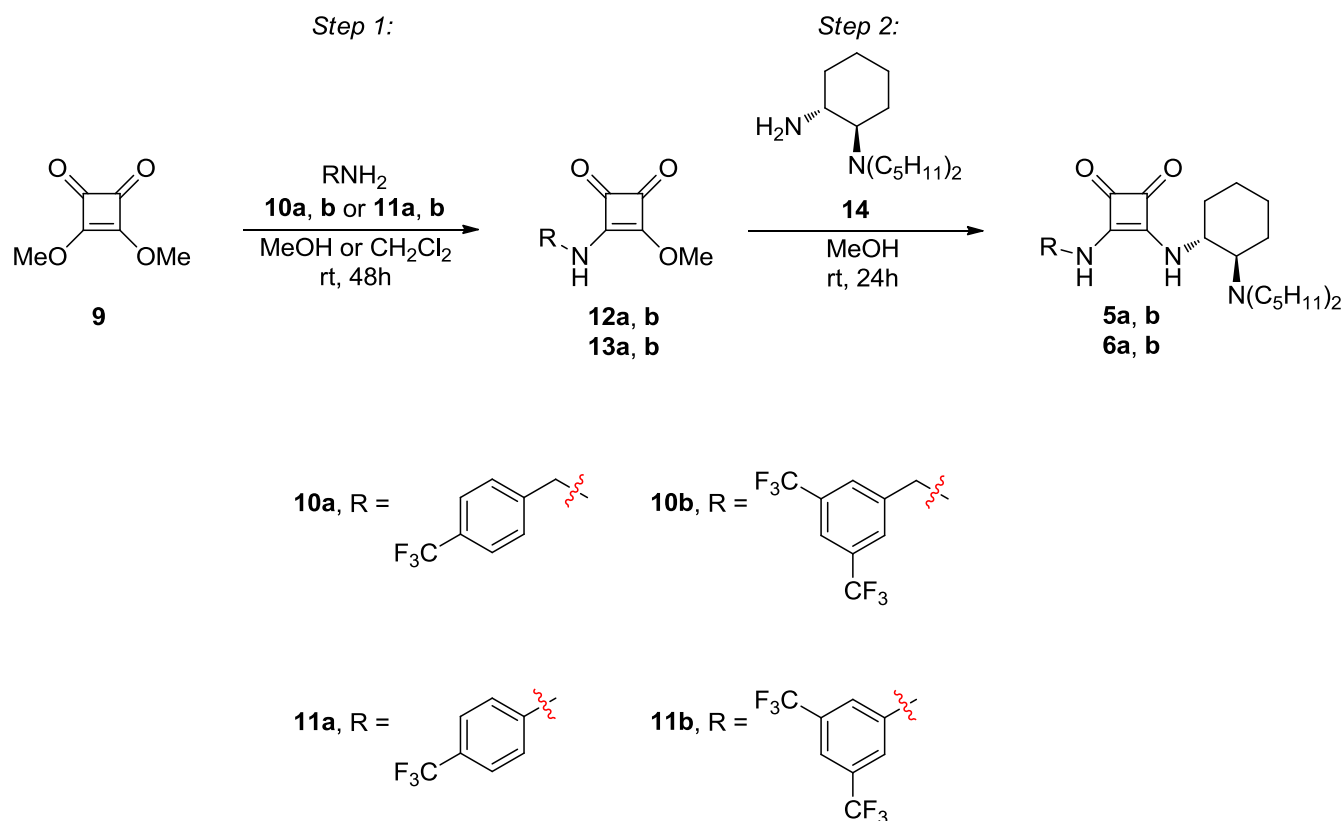

**Scheme S-1** Synthetic route to chiral squaramides **5a**, **5b**, **6a** and **6b**.

*General procedure for the preparation of squaramide catalysts (Scheme S-1):* **Step 1.** 3,4-Dimethoxycyclobut-3-ene-1,2-dione (**9**) (1.0 equiv.) was suspended/dissolved in either MeOH or CH<sub>2</sub>Cl<sub>2</sub> (0.07 M) and the amine **10a**, **b** or **11a**, **b** (1.1 equiv.) was added. The resulting mixture was stirred at ambient temperature for 48 hours. The mixture was then filtered; the collected solid residue was washed with ice-cold MeOH and dried *in vacuo* to afford the corresponding squaramate **12a**, **b**<sup>1</sup> or **13a**, **b**<sup>2, 3</sup>. **Step 2.** 3-(Benzylamino)- or 3-(arylamino)-4-methoxycyclobut-3-ene-1,2-dione **12a**, **b** or **13a**, **b** (1.0 equiv.) was suspended in MeOH (0.07 M) and (1*R*,2*R*)-*N*<sup>1</sup>,*N*<sup>1</sup>-dipentylcyclohexane-1,2-diamine (**14**) (1.0 equiv.) was added. The resulting mixture was stirred at ambient temperature for 24 hours. The mixture was then filtered; the collected solid residue was washed with ice-cold MeOH and dried *in vacuo* to afford the corresponding squaramide **5a**, **b** or **6a**, **b**.

*Notice!* (1*R*,2*R*)-*N*<sup>1</sup>,*N*<sup>1</sup>-dipentylcyclohexane-1,2-diamine (**14**) was prepared according to literature procedure<sup>4</sup> from commercially available (1*R*,2*R*)-cyclohexane-1,2-diamine (Aldrich; 98%, optical purity *ee*: 99% by GLC). The optical antipode, (1*S*,2*S*)-*N*<sup>1</sup>,*N*<sup>1</sup>-dipentylcyclohexane-1,2-diamine (**ent-14**), was prepared in the same manner from commercially available (1*S*,2*S*)-cyclohexane-1,2-diamine D-tartrate (Aldrich; 99%).

**3-(((1*R*,2*R*)-2-(Dipentylamino)cyclohexyl)amino)-4-((4-(trifluoromethyl)benzyl)amino)cyclobut-3-ene-1,2-dione (5a).**

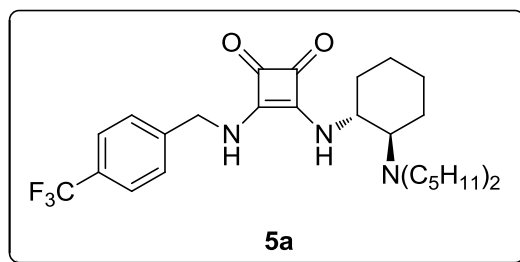

Prepared according to the general procedure by reacting 3-methoxy-4-((4-(trifluoromethyl)benzyl)amino)-cyclobut-3-ene-1,2-dione (**12a**) (0.250 g, 0.88 mmol) with (1*R*,2*R*)-*N*<sup>1</sup>,*N*<sup>1</sup>-dipentylcyclohexane-1,2-diamine (**14**) (0.223 g, 0.88 mmol) to afford the title compound **5a** after recrystallization from pentane. Yield: 0.211 g (48%), colourless solid; M.p.: 204 – 205 °C, decomp.; TLC (hexanes/EtOAc 1:1): *R*<sub>f</sub> = 0.06;  $[\alpha]_D^{20} = -634.9$  (*c* = 0.04, CHCl<sub>3</sub>); <sup>1</sup>H NMR (400 MHz, DMSO-*d*<sub>6</sub>) δ 7.85 (bs, 1H), 7.70 (d, *J* = 8.0 Hz, 2H), 7.53 (d, *J* = 8.0 Hz, 2H), 7.16 (bs, 1H), 4.80 (s, 2H), 4.00 – 3.57 (m, 1H), 2.43 – 2.28 (m, 3H), 2.28 – 2.16 (m, 2H), 2.05 – 1.90 (m, 1H), 1.84 – 1.73 (m, 1H), 1.73 – 1.53 (m, 2H), 1.39 – 0.97 (m, 16H), 0.76 (t, *J* = 6.7 Hz, 6H); <sup>13</sup>C NMR (101 MHz, DMSO-*d*<sub>6</sub>) δ 182.6, 181.9, 168.1, 166.9, 144.0, 128.2 (2C), 124.4 – 126.4 (m, 3C), 124.2 (q, <sup>1</sup>*J*<sub>CF</sub> = 272.0 Hz, 1C), 63.8, 54.1, 49.4 (2C), 46.1, 34.6, 29.0 (2C), 28.5 (2C), 25.0, 24.6, 24.0, 22.1 (2C), 13.9 (2C); HRMS (EI): Exact mass calculated for C<sub>28</sub>H<sub>40</sub>F<sub>3</sub>N<sub>3</sub>O<sub>2</sub> [*M*]<sup>+</sup>: 507.3073, found 507.3066.

**3-((3,5-Bis(trifluoromethyl)benzyl)amino)-4-(((1*R*,2*R*)-2-(dipentylamino)cyclohexyl)amino)cyclobut-3-ene-1,2-dione (5b).**

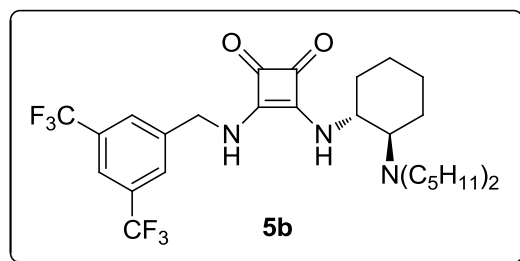

Prepared according to the general procedure by reacting 3-((3,5-bis(trifluoromethyl)benzyl)amino)-4-methoxycyclobut-3-ene-1,2-dione (**12b**) (1.050 g, 2.97 mmol) with (1*R*,2*R*)-*N*<sup>1</sup>,*N*<sup>1</sup>-dipentylcyclohexane-1,2-diamine (**14**) (0.756 g, 2.97 mmol) to afford the title compound **5b**. Yield: 1.045 g (85%), colourless solid; M.p.: 216 – 218 °C, decomp.; TLC (hexanes/EtOAc 1:1): *R*<sub>f</sub> = 0.06;  $[\alpha]_D^{20} = -86.0$  (*c* = 0.05, CHCl<sub>3</sub>); <sup>1</sup>H NMR (300 MHz, DMSO-*d*<sub>6</sub>) δ 8.02 (s, 3H), 7.87 (bs, 1H), 7.24 (bs, 1H), 5.08 – 4.67 (m, 2H), 4.05 – 3.57 (m, 1H), 2.41 – 2.26 (m, 3H), 2.26 – 2.12 (m, 2H), 2.04 – 1.85 (m, 1H), 1.83 – 1.72 (m, 1H), 1.72 – 1.54 (m, 2H), 1.41 – 0.87 (m, 16H), 0.70 (t, *J* = 6.4 Hz, 6H); <sup>13</sup>C NMR (101 MHz, DMSO-*d*<sub>6</sub> + DCl) δ 183.0, 182.4, 169.3, 167.9, 142.8, 130.9 (q, <sup>2</sup>*J*<sub>CF</sub> = 32.9 Hz, 2C), 129.0 (2C), 123.8 (q, <sup>1</sup>*J*<sub>CF</sub> = 272.9 Hz, 2C), 121.6, 64.1, 52.4, 52.0, 51.3, 46.3, 34.4, 28.8, 28.7, 24.7, 24.3 (2C), 24.1, 24.0, 22.1, 21.9, 14.2, 14.0; HRMS (EI): Exact mass calculated for C<sub>29</sub>H<sub>39</sub>F<sub>6</sub>N<sub>3</sub>O<sub>2</sub> [*M*]<sup>+</sup>: 575.2946, found 575.2937.

**3-(((1*R*,2*R*)-2-(Dipentylamino)cyclohexyl)amino)-4-((4-(trifluoromethyl)phenyl)amino)cyclobut-3-ene-1,2-dione (6a).**

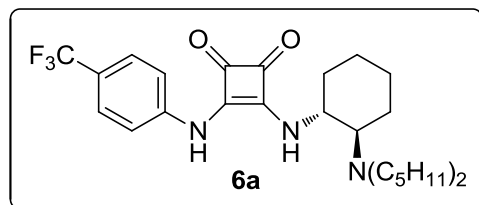

Prepared according to the general procedure by reacting 3-methoxy-4-((4-(trifluoromethyl)phenyl)amino)-cyclobut-3-ene-1,2-dione (**13a**) (0.763 g, 2.81 mmol) with (1*R*,2*R*)-*N*<sup>1</sup>,*N*<sup>1</sup>-dipentylcyclohexane-1,2-diamine (**14**) (0.715 g, 2.81 mmol) to afford the title compound **6a**. Yield: 0.905 g (66%), colourless solid; M.p.: 200 – 201 °C, decomp.; TLC (hexanes/EtOAc 1:1): *R*<sub>f</sub> = 0.10;  $[\alpha]_D^{20} = -141.7$  (*c* = 0.13, CHCl<sub>3</sub>); <sup>1</sup>H NMR (300 MHz, TFA) δ

7.59 (d,  $J = 8.2$  Hz, 2H), 7.36 (d,  $J = 8.2$  Hz, 2H), 4.75 – 4.52 (m, 1H), 3.76 – 3.45 (m, 2H), 3.33 (td,  $J = 12.6$ , 4.3 Hz, 1H), 3.14 (td,  $J = 12.3$ , 5.2 Hz, 1H), 2.89 (td,  $J = 12.2$ , 4.6 Hz, 1H), 2.36 – 2.21 (m, 1H), 2.21 – 2.06 (m, 1H), 2.04 – 1.50 (m, 8H), 1.50 – 1.35 (m, 2H), 1.35 – 1.14 (m, 8H), 0.94 – 0.68 (m, 6H);  $^{13}\text{C}$  NMR (101 MHz, DMSO- $d_6$ )  $\delta$  184.5, 179.6, 169.7, 162.0, 142.8, 126.6 (2C), 124.5 (q,  $^1J_{\text{CF}} = 271.0$  Hz), 122.1 (q,  $^2J_{\text{CF}} = 32.1$  Hz), 117.6 (2C), 64.1 (2C), 54.6, 49.2, 34.2, 29.2 (2C), 28.5 (2C), 24.9, 24.6, 23.6, 22.2 (2C), 14.0 (2C); HRMS (EI): Exact mass calculated for  $\text{C}_{27}\text{H}_{38}\text{F}_3\text{N}_3\text{O}_2$  [ $M$ ] $^+$ : 493.2916, found 493.2921.

**3-((3,5-Bis(trifluoromethyl)phenyl)amino)-4-(((1*R*,2*R*)-2-(dipentylamino)cyclohexyl)amino)cyclobut-3-ene-1,2-dione (**6b**).**

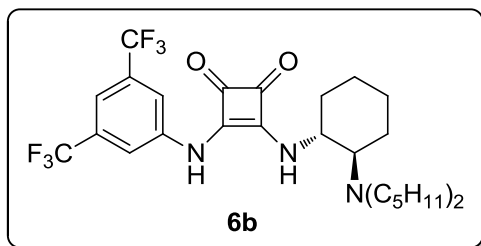

Prepared according to the general procedure by reacting 3-((3,5-bis(trifluoromethyl)phenyl)amino)-4-methoxycyclobut-3-ene-1,2-dione (**13b**) (1.000 g, 2.94 mmol) with (1*R*,2*R*)- $N^1,N^1$ -dipentylcyclohexane-1,2-diamine (**14**) (0.748 g, 2.94 mmol) to afford the title compound **6b**. Yield: 1.050 g (64%), colourless solid; M.p.: 195 – 196 °C, decomp.; TLC (hexanes/EtOAc 1:1):  $R_f = 0.12$ ;  $[\alpha]_D^{20} = -107.6$  ( $c = 0.10$ ,  $\text{CHCl}_3$ );  $^1\text{H}$  NMR (300 MHz, TFA)  $\delta$  7.87 (s, 2H), 7.79 (s, 1H), 4.74 (td,  $J = 11.2$ , 4.2 Hz, 1H), 3.89 – 3.54 (m, 2H), 3.44 (td,  $J = 12.5$ , 6.3 Hz, 1H), 3.25 (td,  $J = 12.4$ , 5.2 Hz, 1H), 2.99 (td,  $J = 12.2$ , 4.5 Hz, 1H), 2.47 – 2.32 (m, 1H), 2.32 – 2.17 (m, 1H), 2.16 – 1.46 (m, 10H), 1.46 – 1.26 (m, 8H), 1.02 – 0.81 (m, 6H);  $^{13}\text{C}$  NMR (101 MHz, DMSO- $d_6$ )  $\delta$  184.5, 179.7, 170.0, 161.4, 141.3, 131.4 (q,  $^2J_{\text{CF}} = 32.9$ , 31.6 Hz, 2C), 123.1 (q,  $^1J_{\text{CF}} = 273.0$  Hz, 2C), 117.5 (2C), 114.3, 64.2 (2C), 54.7, 49.2, 34.1, 29.2 (2C), 28.5 (2C), 24.8, 24.6, 23.7, 22.2 (2C), 13.9 (2C); HRMS (EI): Exact mass calculated for  $\text{C}_{28}\text{H}_{37}\text{F}_6\text{N}_3\text{O}_2$  [ $M$ ] $^+$ : 561.2790, found 561.2799.

**3-((3,5-Bis(trifluoromethyl)phenyl)amino)-4-(((1*S*,2*S*)-2-(dipentylamino)cyclohexyl)amino)cyclobut-3-ene-1,2-dione (*ent*-**6b**).**

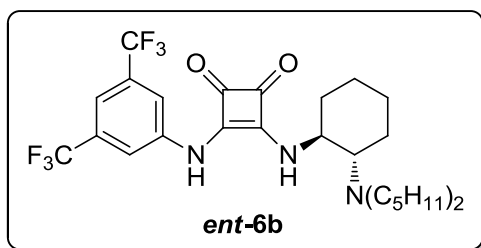

Prepared according to the general procedure by reacting 3-((3,5-bis(trifluoromethyl)phenyl)amino)-4-methoxycyclobut-3-ene-1,2-dione (**13b**) (0.240 g, 0.71 mmol) with (1*S*,2*S*)- $N^1,N^1$ -dipentylcyclohexane-1,2-diamine (*ent*-**14**) (0.180 g, 0.71 mmol) to afford the title compound *ent*-**6b**. Yield: 0.164 g (41%), colourless solid; TLC (hexanes/EtOAc 1:1):  $R_f = 0.12$ ;  $[\alpha]_D^{20} = 110.6$  ( $c = 0.11$ ,  $\text{CHCl}_3$ ).



JET-176-017-35  
PROTON DMSO {D:\uio\AVII400-05} jorinet 12

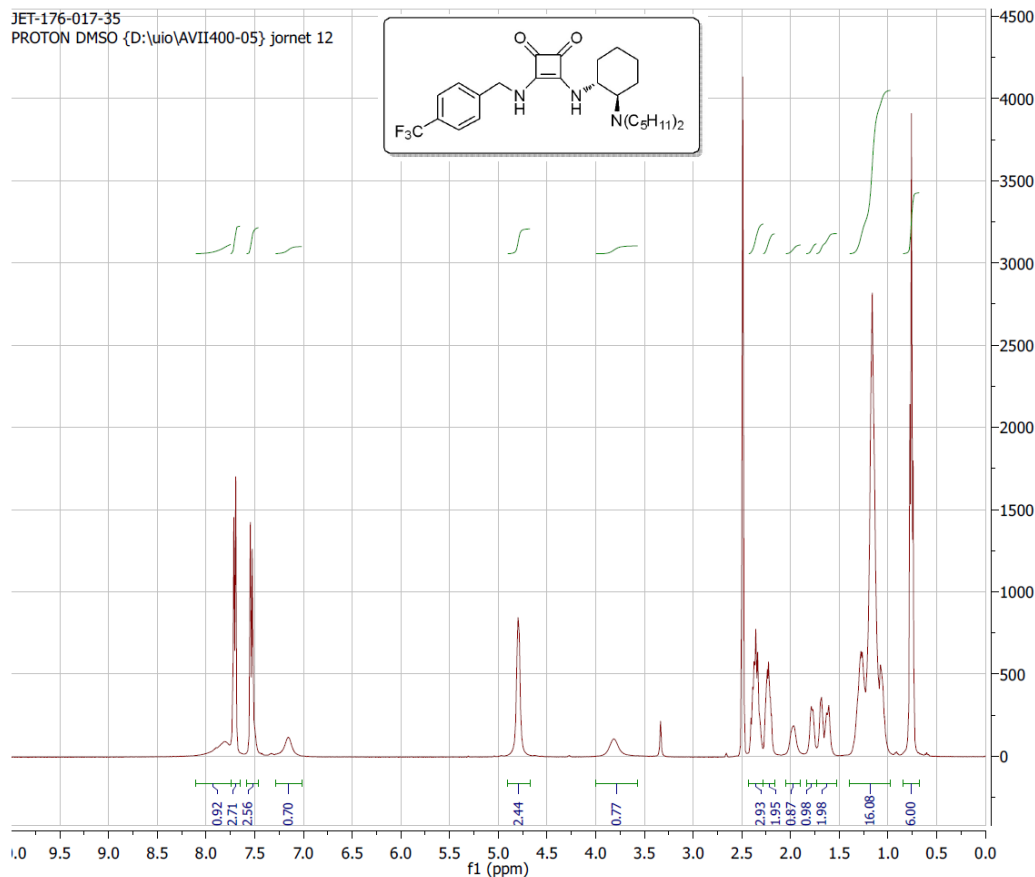

| Parameter                 | Value                                           |
|---------------------------|-------------------------------------------------|
| 1 Data File Name          | M:/ Jorin/ NMR/ AVI400/ JET-176-017-35/ 10/ fid |
| 2 Title                   | JET-176-017-35                                  |
| 3 Comment                 | PROTON DMSO {D:\uio\ AVII400-05} jorinet 12     |
| 4 Origin                  | Bruker BioSpin GmbH                             |
| 5 Owner                   | tnnr                                            |
| 6 Site                    |                                                 |
| 7 Spectrometer            | spect                                           |
| 8 Author                  |                                                 |
| 9 Solvent                 | DMSO                                            |
| 10 Temperature            | 294.7                                           |
| 11 Pulse Sequence         | zg30                                            |
| 12 Experiment             | 1D                                              |
| 13 Number of Scans        | 16                                              |
| 14 Receiver Gain          | 72                                              |
| 15 Relaxation Delay       | 1.0000                                          |
| 16 Pulse Width            | 12.1500                                         |
| 17 Acquisition Time       | 3.9846                                          |
| 18 Acquisition Date       | 2012-05-05T16:49:00                             |
| 19 Modification Date      | 2012-05-05T16:49:10                             |
| 20 Spectrometer Frequency | 400.18                                          |
| 21 Spectral Width         | 8223.7                                          |
| 22 Lowest Frequency       | -1646.4                                         |
| 23 Nucleus                | 1H                                              |
| 24 Acquired Size          | 32768                                           |
| 25 Spectral Size          | 65536                                           |

Figure S-1 <sup>1</sup>H-NMR spectrum of compound 5a.

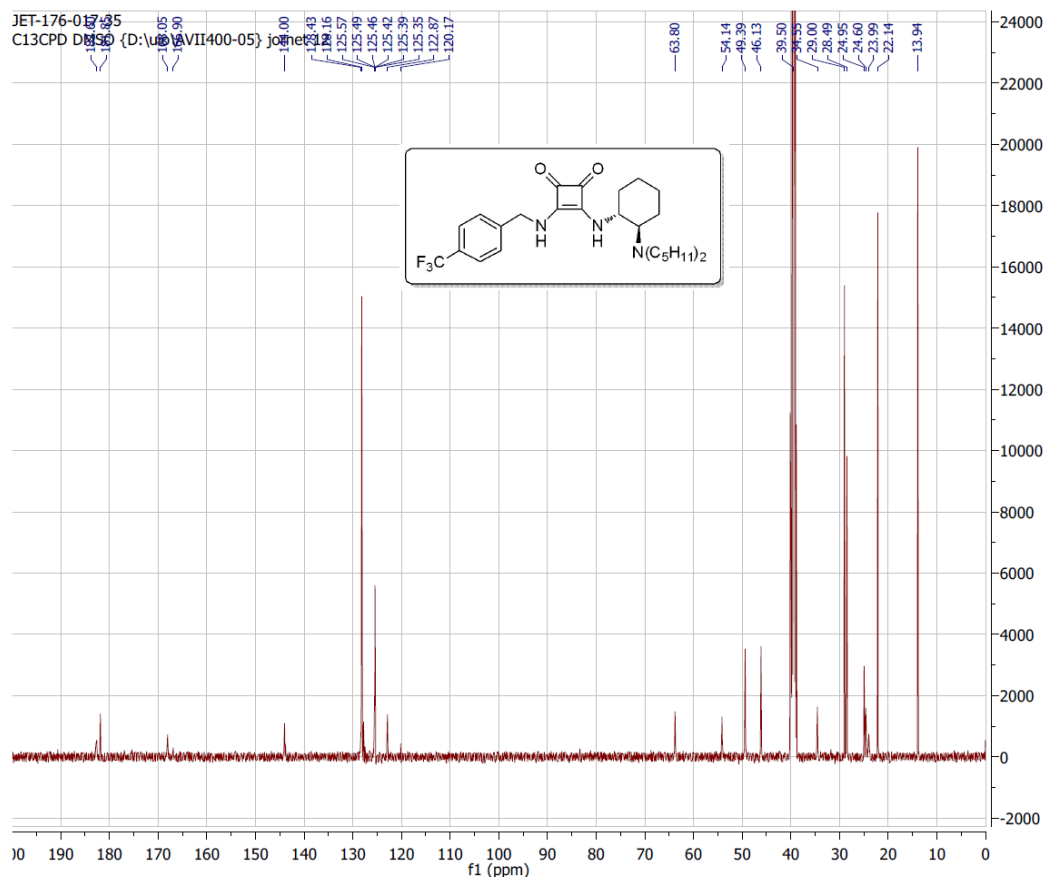

| Parameter                 | Value                                           |
|---------------------------|-------------------------------------------------|
| 1 Data File Name          | M:/ Jorin/ NMR/ AVI400/ JET-176-017-35/ 11/ fid |
| 2 Title                   | JET-176-017-35                                  |
| 3 Comment                 | C13CPD DMSO {D:\uio\ AVII400-05} jorinet 12     |
| 4 Origin                  | Bruker BioSpin GmbH                             |
| 5 Owner                   | tnnr                                            |
| 6 Site                    |                                                 |
| 7 Spectrometer            | spect                                           |
| 8 Author                  |                                                 |
| 9 Solvent                 | DMSO                                            |
| 10 Temperature            | 295.7                                           |
| 11 Pulse Sequence         | zgpg30                                          |
| 12 Experiment             | 1D                                              |
| 13 Number of Scans        | 2048                                            |
| 14 Receiver Gain          | 1620                                            |
| 15 Relaxation Delay       | 2.0000                                          |
| 16 Pulse Width            | 7.0000                                          |
| 17 Acquisition Time       | 1.2977                                          |
| 18 Acquisition Date       | 2012-05-05T18:45:00                             |
| 19 Modification Date      | 2012-05-05T18:45:59                             |
| 20 Spectrometer Frequency | 100.64                                          |
| 21 Spectral Width         | 25252.5                                         |
| 22 Lowest Frequency       | -1102.0                                         |
| 23 Nucleus                | 13C                                             |
| 24 Acquired Size          | 32768                                           |
| 25 Spectral Size          | 65536                                           |

Figure S-2 <sup>13</sup>C-NMR spectrum of compound 5a.

JET-176-038-77/20  
 PROTON DMSO D: {UIO\jornet} 4

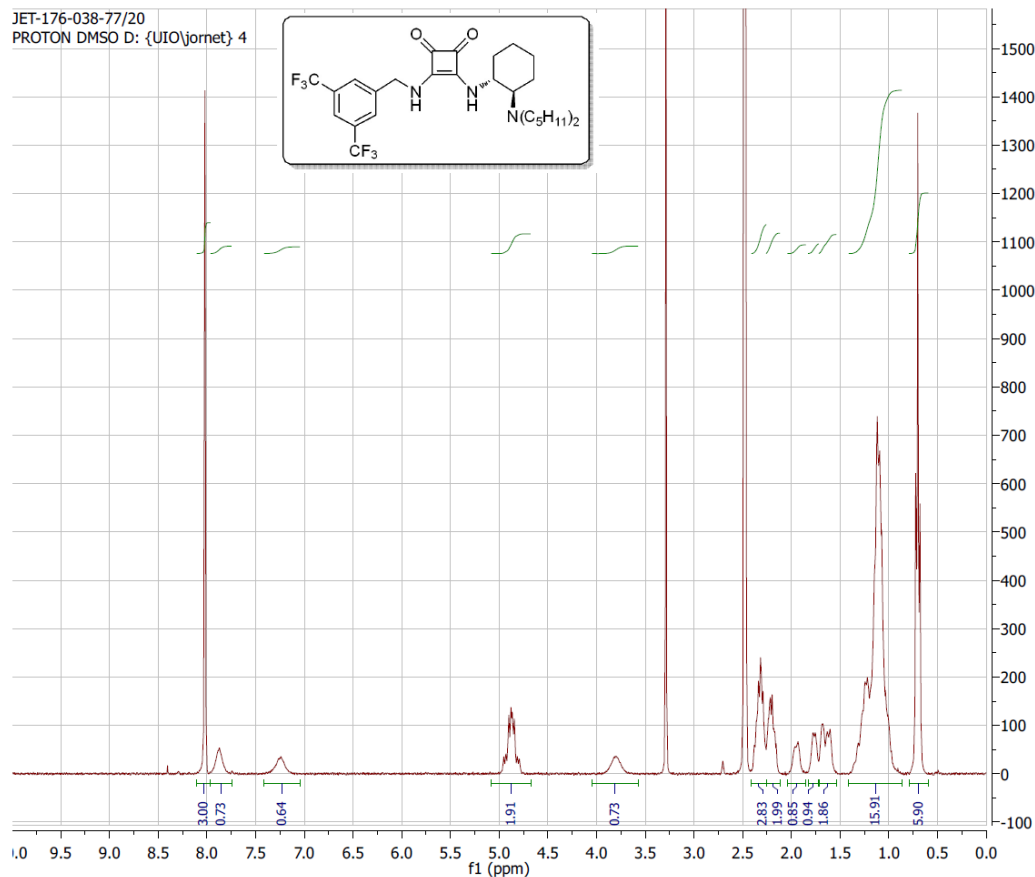

| Parameter                 | Value                                 |
|---------------------------|---------------------------------------|
| 1 Data File Name          | M:/Jorn/ NMR/ JET-176-038-77/ 20/ fid |
| 2 Title                   | JET-176-038-77/ 20                    |
| 3 Comment                 | PROTON DMSO D: {UIO\jornet} 4         |
| 4 Origin                  | Bruker BioSpin GmbH                   |
| 5 Owner                   | tnnr                                  |
| 6 Site                    |                                       |
| 7 Spectrometer            | DPX300                                |
| 8 Author                  |                                       |
| 9 Solvent                 | DMSO                                  |
| 10 Temperature            | 298.2                                 |
| 11 Pulse Sequence         | zg30                                  |
| 12 Experiment             | 1D                                    |
| 13 Number of Scans        | 64                                    |
| 14 Receiver Gain          | 1149                                  |
| 15 Relaxation Delay       | 1.0000                                |
| 16 Pulse Width            | 10.0000                               |
| 17 Acquisition Time       | 5.3084                                |
| 18 Acquisition Date       | 2012-01-10T18:53:29                   |
| 19 Modification Date      | 2012-01-10T17:53:34                   |
| 20 Spectrometer Frequency | 300.13                                |
| 21 Spectral Width         | 6172.8                                |
| 22 Lowest Frequency       | -1240.8                               |
| 23 Nucleus                | 1H                                    |
| 24 Acquired Size          | 32768                                 |
| 25 Spectral Size          | 65536                                 |

Figure S-3 <sup>1</sup>H-NMR spectrum of compound 5b.

JET-176-315-CF3  
 C13CPD DMSO {D:\G05\AVII400-05} joriet

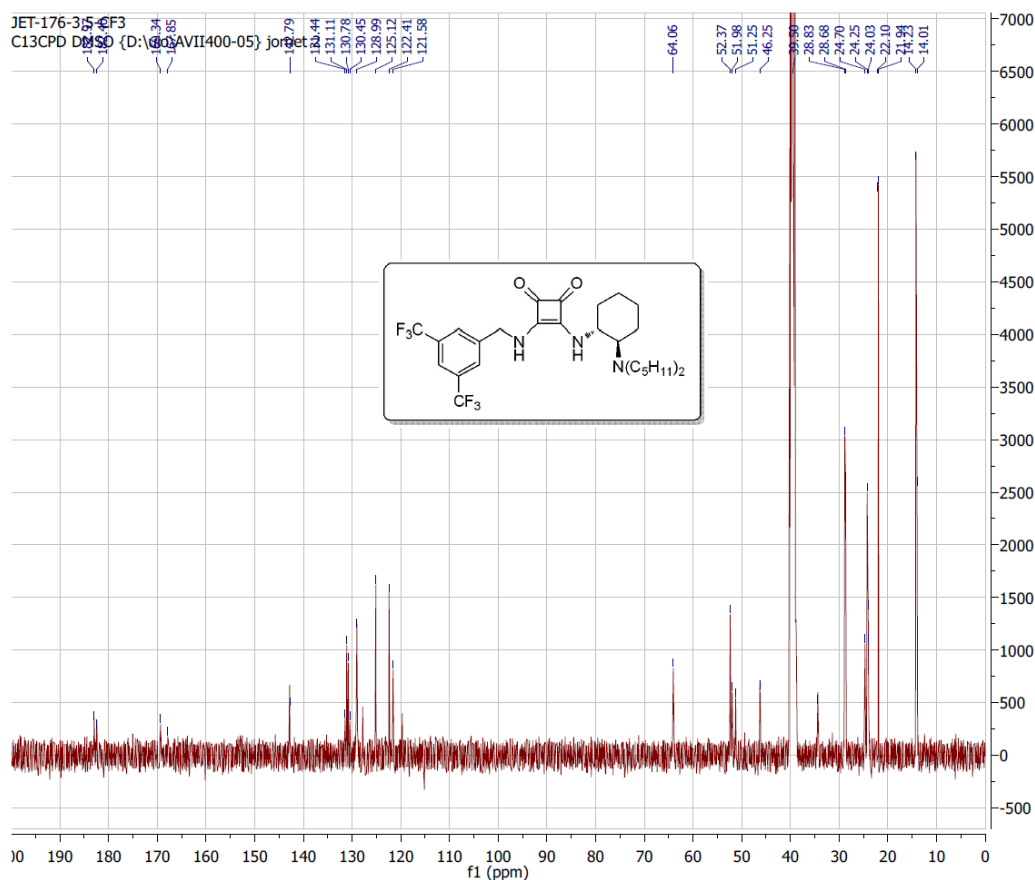

| Parameter                 | Value                                            |
|---------------------------|--------------------------------------------------|
| 1 Data File Name          | M:/Jorn/ NMR/ AVI400/ JET-176-3, 5- CF3/ 30/ fid |
| 2 Title                   | JET-176-3, 5- CF3                                |
| 3 Comment                 | C13CPD DMSO {D:\ uio\ AVII400-05} joriet 2       |
| 4 Origin                  | Bruker BioSpin GmbH                              |
| 5 Owner                   | tnnr                                             |
| 6 Site                    |                                                  |
| 7 Spectrometer            | spect                                            |
| 8 Author                  |                                                  |
| 9 Solvent                 | DMSO                                             |
| 10 Temperature            | 300.0                                            |
| 11 Pulse Sequence         | zgpg30                                           |
| 12 Experiment             | 1D                                               |
| 13 Number of Scans        | 1024                                             |
| 14 Receiver Gain          | 2050                                             |
| 15 Relaxation Delay       | 5.0000                                           |
| 16 Pulse Width            | 7.0000                                           |
| 17 Acquisition Time       | 1.2977                                           |
| 18 Acquisition Date       | 2012-11-05T09:59:00                              |
| 19 Modification Date      | 2012-11-05T09:59:39                              |
| 20 Spectrometer Frequency | 100.64                                           |
| 21 Spectral Width         | 25252.5                                          |
| 22 Lowest Frequency       | -1038.7                                          |
| 23 Nucleus                | 13C                                              |
| 24 Acquired Size          | 32768                                            |
| 25 Spectral Size          | 65536                                            |

Figure S-4 <sup>13</sup>C-NMR spectrum of compound 5b.

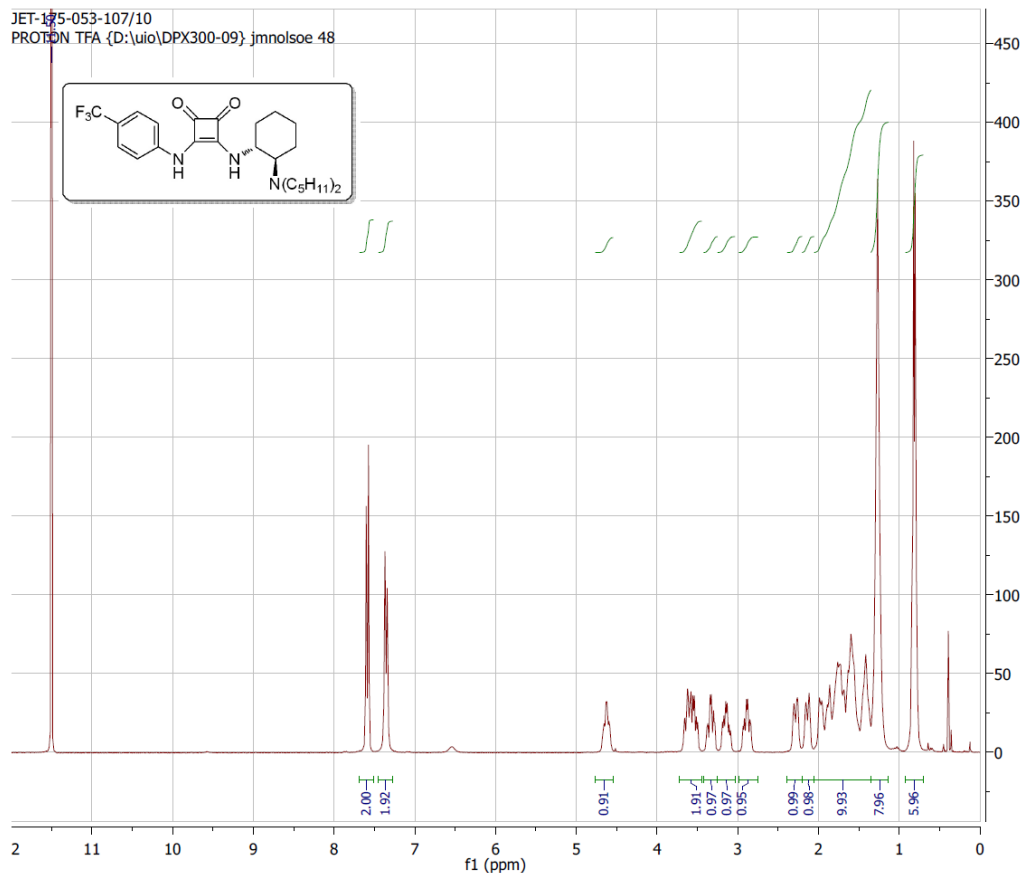

| Parameter                 | Value                                    |
|---------------------------|------------------------------------------|
| 1 Data File Name          | M:/ NMR/ JET-175-053-107/ 10/ fid        |
| 2 Title                   | JET-175-053-107/ 10                      |
| 3 Comment                 | PROTON TFA {D:\uio\DPX300-09} jmnolse 48 |
| 4 Origin                  | Bruker BioSpin GmbH                      |
| 5 Owner                   | tnmr                                     |
| 6 Site                    |                                          |
| 7 Spectrometer            | DPX300                                   |
| 8 Author                  |                                          |
| 9 Solvent                 | TFA                                      |
| 10 Temperature            | 298.2                                    |
| 11 Pulse Sequence         | zg30                                     |
| 12 Experiment             | 1D                                       |
| 13 Number of Scans        | 16                                       |
| 14 Receiver Gain          | 161                                      |
| 15 Relaxation Delay       | 1.0000                                   |
| 16 Pulse Width            | 10.0000                                  |
| 17 Acquisition Time       | 5.3084                                   |
| 18 Acquisition Date       | 2012-09-18T16:39:52                      |
| 19 Modification Date      | 2012-09-18T16:39:57                      |
| 20 Spectrometer Frequency | 300.13                                   |
| 21 Spectral Width         | 6172.8                                   |
| 22 Lowest Frequency       | -1277.1                                  |
| 23 Nucleus                | $^1\text{H}$                             |
| 24 Acquired Size          | 32768                                    |
| 25 Spectral Size          | 65536                                    |

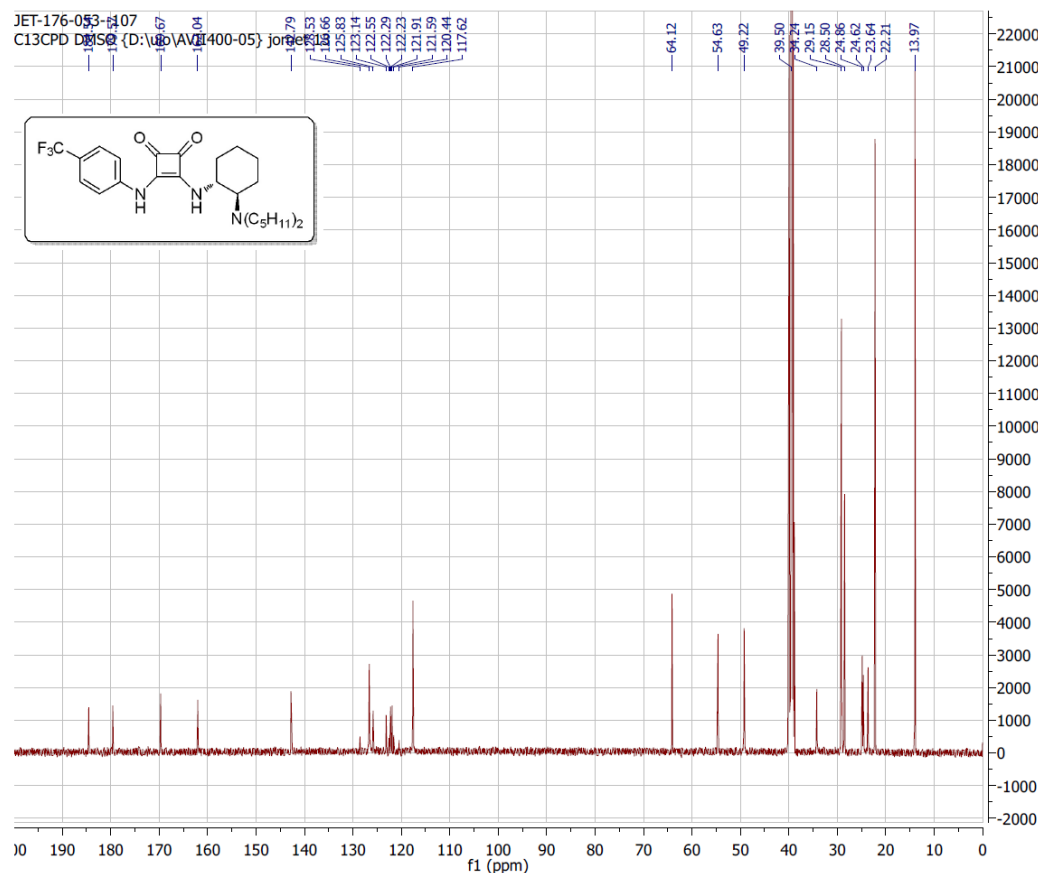

| Parameter                 | Value                                             |
|---------------------------|---------------------------------------------------|
| 1 Data File Name          | M:/ Jorjet/ NMR/ AVI400/ JET-176-053-107/ 11/ fid |
| 2 Title                   | JET-176-053-107                                   |
| 3 Comment                 | C13CPD DMSO {D:\uio\AVI400-05} jorjet 13          |
| 4 Origin                  | Bruker BioSpin GmbH                               |
| 5 Owner                   | tnmr                                              |
| 6 Site                    |                                                   |
| 7 Spectrometer            | spect                                             |
| 8 Author                  |                                                   |
| 9 Solvent                 | DMSO                                              |
| 10 Temperature            | 295.8                                             |
| 11 Pulse Sequence         | zgpg30                                            |
| 12 Experiment             | 1D                                                |
| 13 Number of Scans        | 2048                                              |
| 14 Receiver Gain          | 1150                                              |
| 15 Relaxation Delay       | 2.0000                                            |
| 16 Pulse Width            | 7.0000                                            |
| 17 Acquisition Time       | 1.2977                                            |
| 18 Acquisition Date       | 2012-05-05T20:48:00                               |
| 19 Modification Date      | 2012-05-05T20:49:06                               |
| 20 Spectrometer Frequency | 100.64                                            |
| 21 Spectral Width         | 25252.5                                           |
| 22 Lowest Frequency       | -1101.7                                           |
| 23 Nucleus                | $^{13}\text{C}$                                   |
| 24 Acquired Size          | 32768                                             |
| 25 Spectral Size          | 65536                                             |

JET 222-47-97/30  
 PROTON TFA {D:\uio\DPX300-09} jmnolse 43

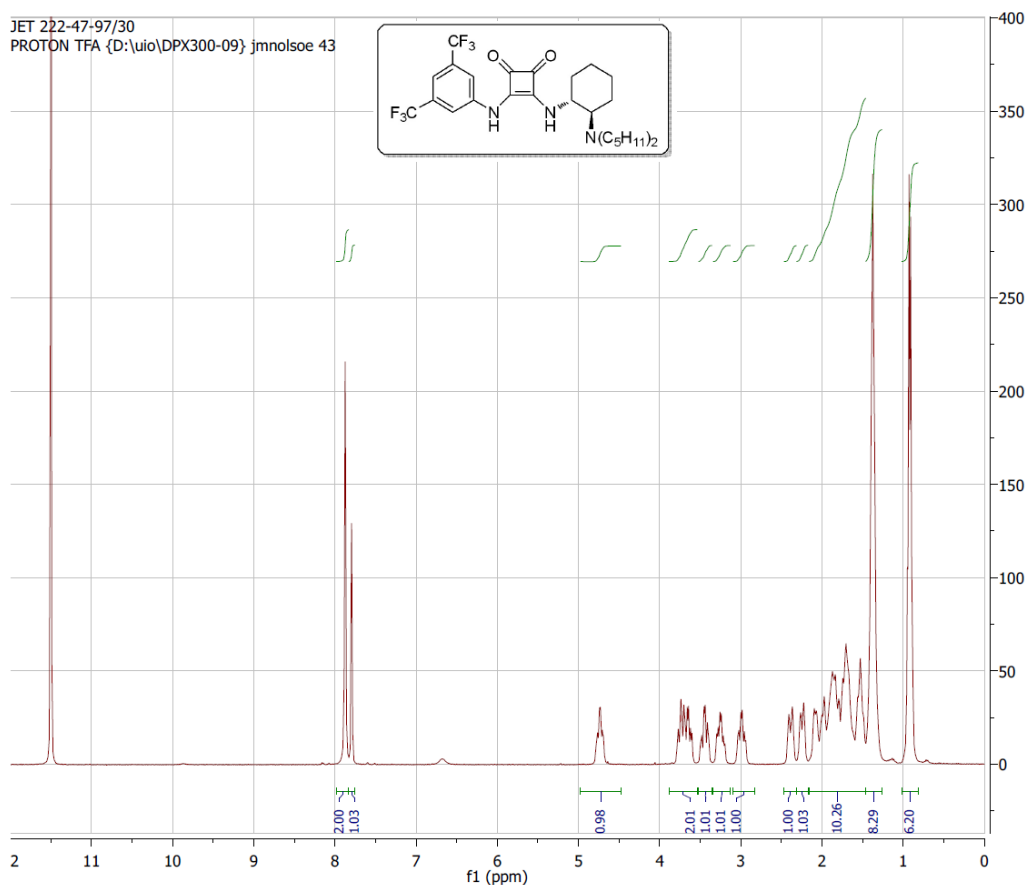

| Parameter                 | Value                                      |
|---------------------------|--------------------------------------------|
| 1 Data File Name          | M:/ NMR/ JET 222-47-97/ 30/ fid            |
| 2 Title                   | JET 222-47-97/ 30                          |
| 3 Comment                 | PROTON TFA {D:\ uio\ DPX300-09} jmnolse 43 |
| 4 Origin                  | Bruker BioSpin GmbH                        |
| 5 Owner                   | tnnr                                       |
| 6 Site                    |                                            |
| 7 Spectrometer            | DPX300                                     |
| 8 Author                  |                                            |
| 9 Solvent                 | TFA                                        |
| 10 Temperature            | 298.2                                      |
| 11 Pulse Sequence         | zg30                                       |
| 12 Experiment             | 1D                                         |
| 13 Number of Scans        | 16                                         |
| 14 Receiver Gain          | 203                                        |
| 15 Relaxation Delay       | 1.0000                                     |
| 16 Pulse Width            | 10.0000                                    |
| 17 Acquisition Time       | 5.3084                                     |
| 18 Acquisition Date       | 2012-09-05T18:17:27                        |
| 19 Modification Date      | 2012-09-05T18:17:34                        |
| 20 Spectrometer Frequency | 300.13                                     |
| 21 Spectral Width         | 6172.8                                     |
| 22 Lowest Frequency       | -1275.9                                    |
| 23 Nucleus                | 1H                                         |
| 24 Acquired Size          | 32768                                      |
| 25 Spectral Size          | 65536                                      |

Figure S-7 <sup>1</sup>H-NMR spectrum of compound 6b.

JET-176-091-183  
 C13CPD DMSO {D:\uio\AVI400-05} jorjet 14

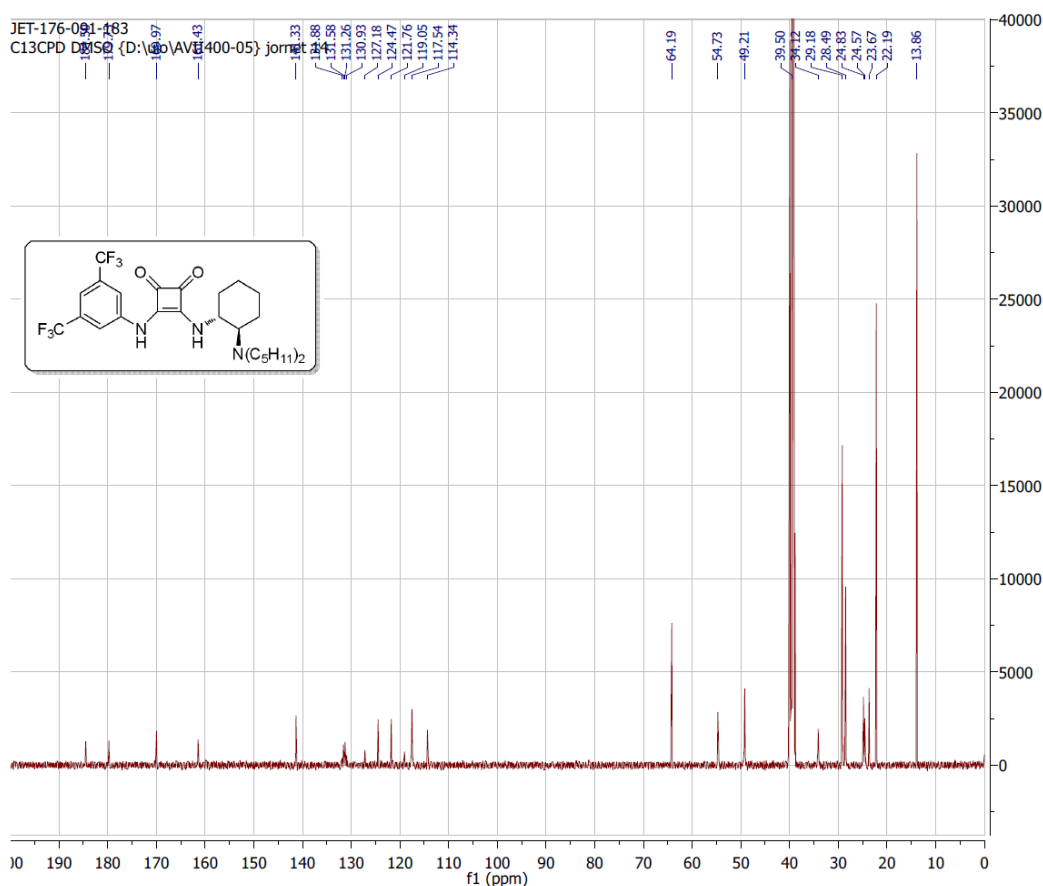

| Parameter                 | Value                                           |
|---------------------------|-------------------------------------------------|
| 1 Data File Name          | M:/ Jern/ NMR/ AVI400/ JET-176-091-183/ 11/ fid |
| 2 Title                   | JET-176-091-183                                 |
| 3 Comment                 | C13CPD DMSO {D:\ uio\ AVI400-05} jorjet 14      |
| 4 Origin                  | Bruker BioSpin GmbH                             |
| 5 Owner                   | tnnr                                            |
| 6 Site                    |                                                 |
| 7 Spectrometer            | spect                                           |
| 8 Author                  |                                                 |
| 9 Solvent                 | DMSO                                            |
| 10 Temperature            | 295.7                                           |
| 11 Pulse Sequence         | zgpg30                                          |
| 12 Experiment             | 1D                                              |
| 13 Number of Scans        | 2048                                            |
| 14 Receiver Gain          | 2050                                            |
| 15 Relaxation Delay       | 2.0000                                          |
| 16 Pulse Width            | 7.0000                                          |
| 17 Acquisition Time       | 1.2977                                          |
| 18 Acquisition Date       | 2012-05-05T22:51:00                             |
| 19 Modification Date      | 2012-05-05T22:51:49                             |
| 20 Spectrometer Frequency | 100.64                                          |
| 21 Spectral Width         | 25252.5                                         |
| 22 Lowest Frequency       | -1101.2                                         |
| 23 Nucleus                | 13C                                             |
| 24 Acquired Size          | 32768                                           |
| 25 Spectral Size          | 65536                                           |

Figure S-8 <sup>13</sup>C-NMR spectrum of compound 6b.

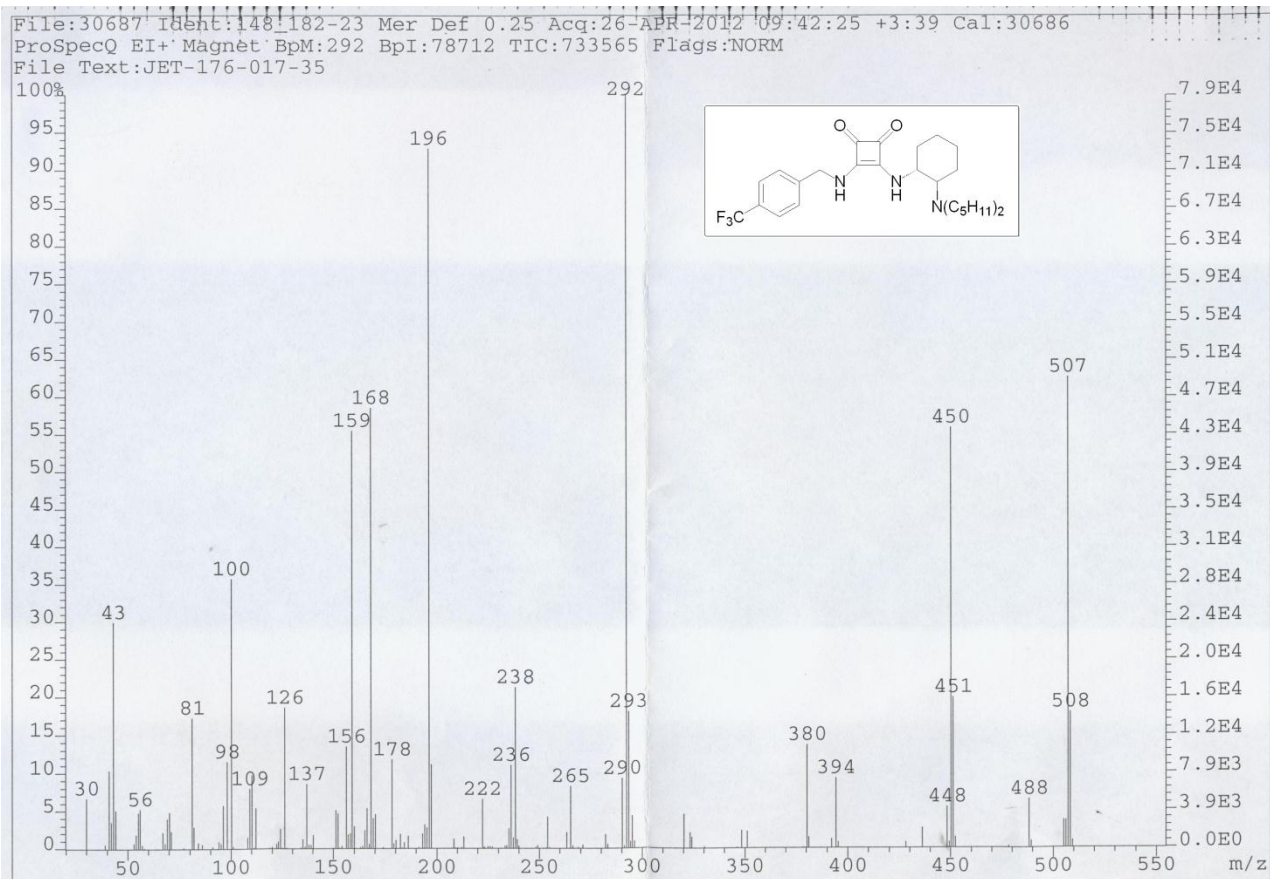

Figure S-9 MS spectrum of compound 5a.

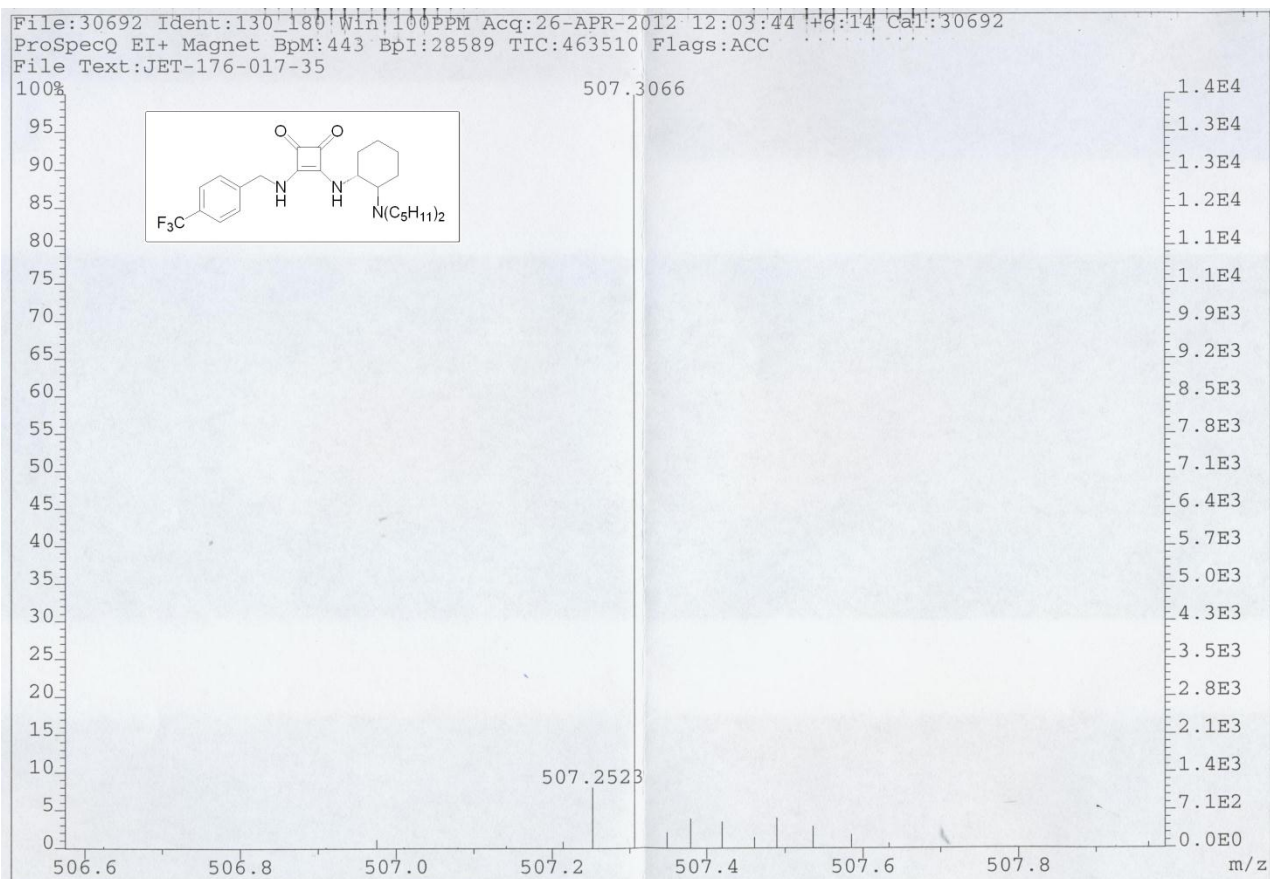

Figure S-10 HRMS spectrum of compound 5a.



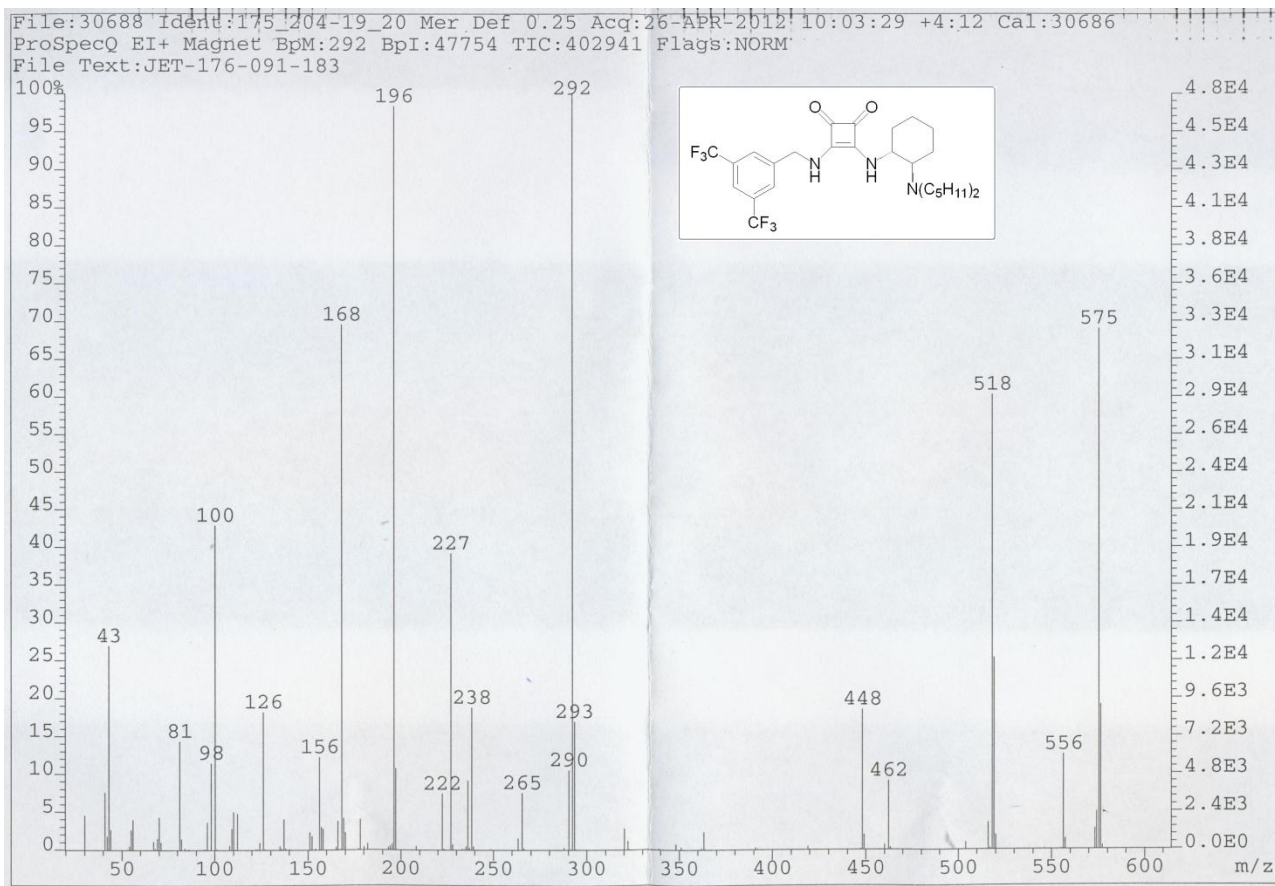

Figure S-11 MS spectrum of compound 5b.

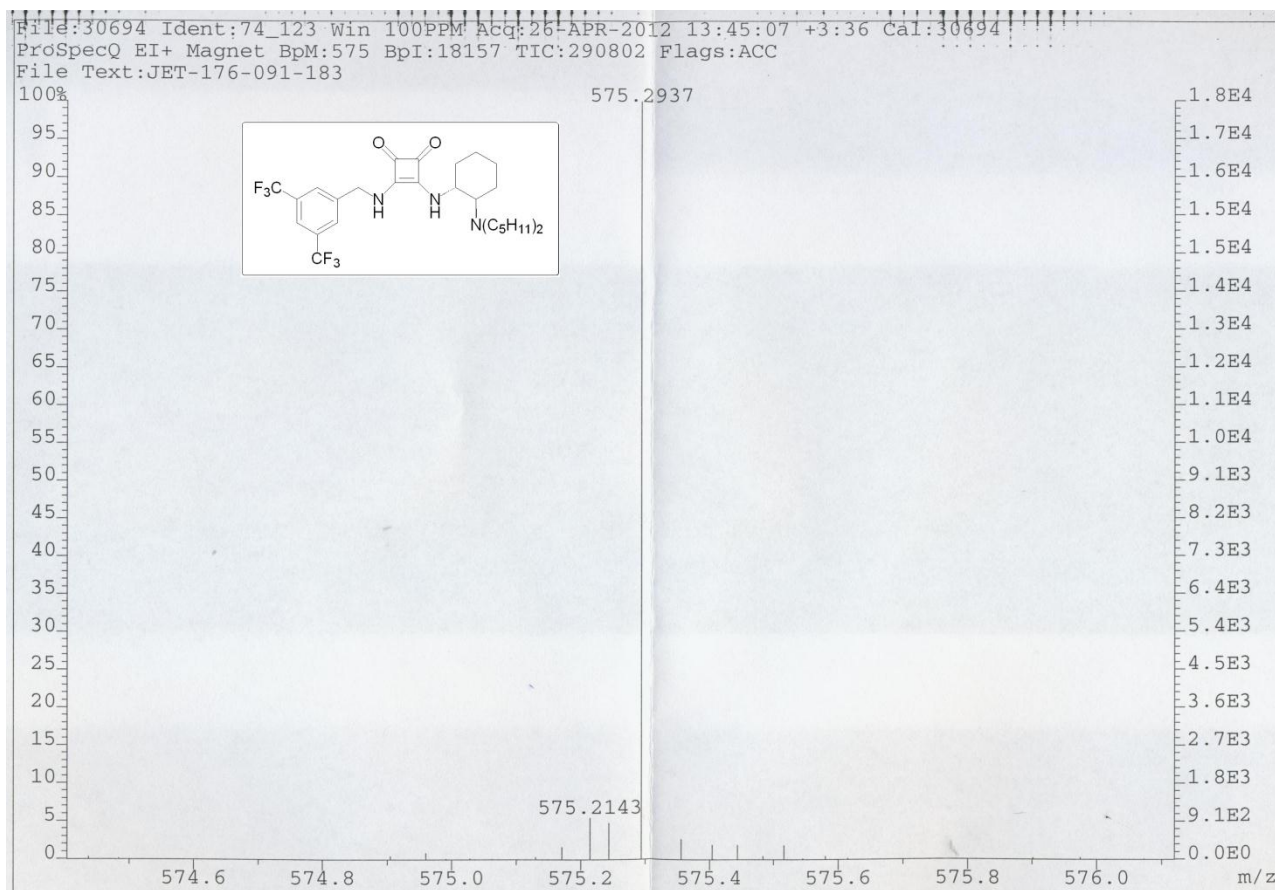

Figure S-12 HRMS spectrum of compound 5b.

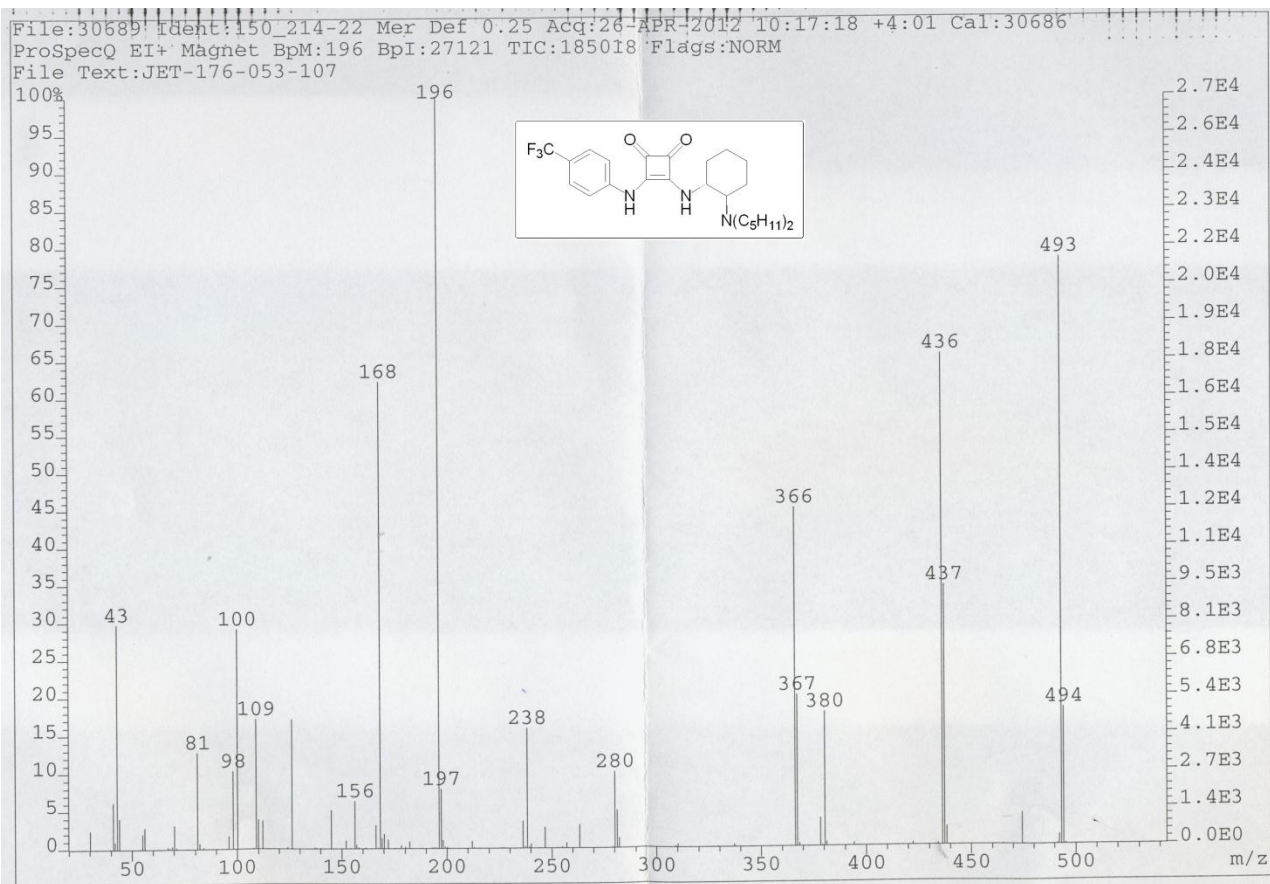

Figure S-13 MS spectrum of compound 6a.

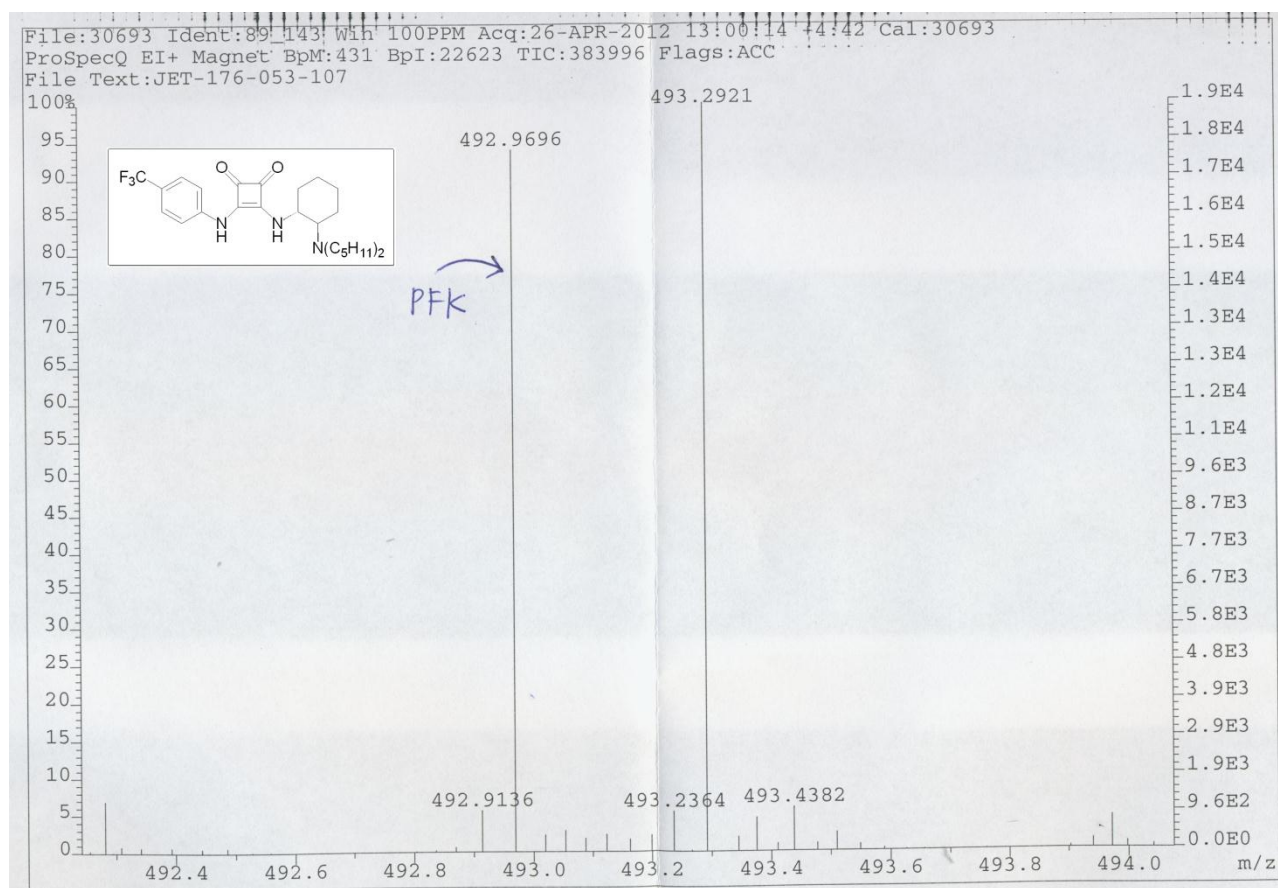

Figure S-14 HRMS spectrum of compound 6a.



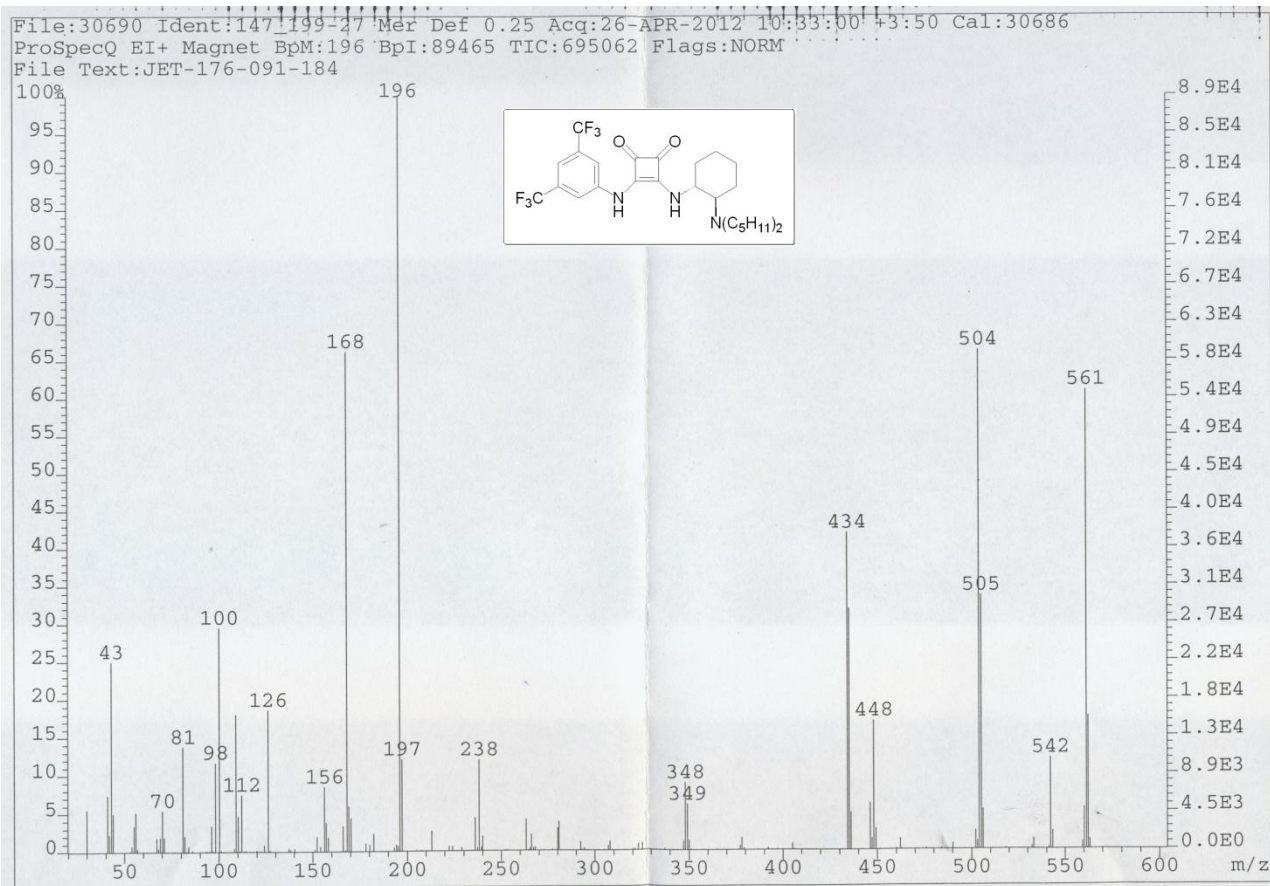

Figure S-15 MS spectrum of compound 6b.

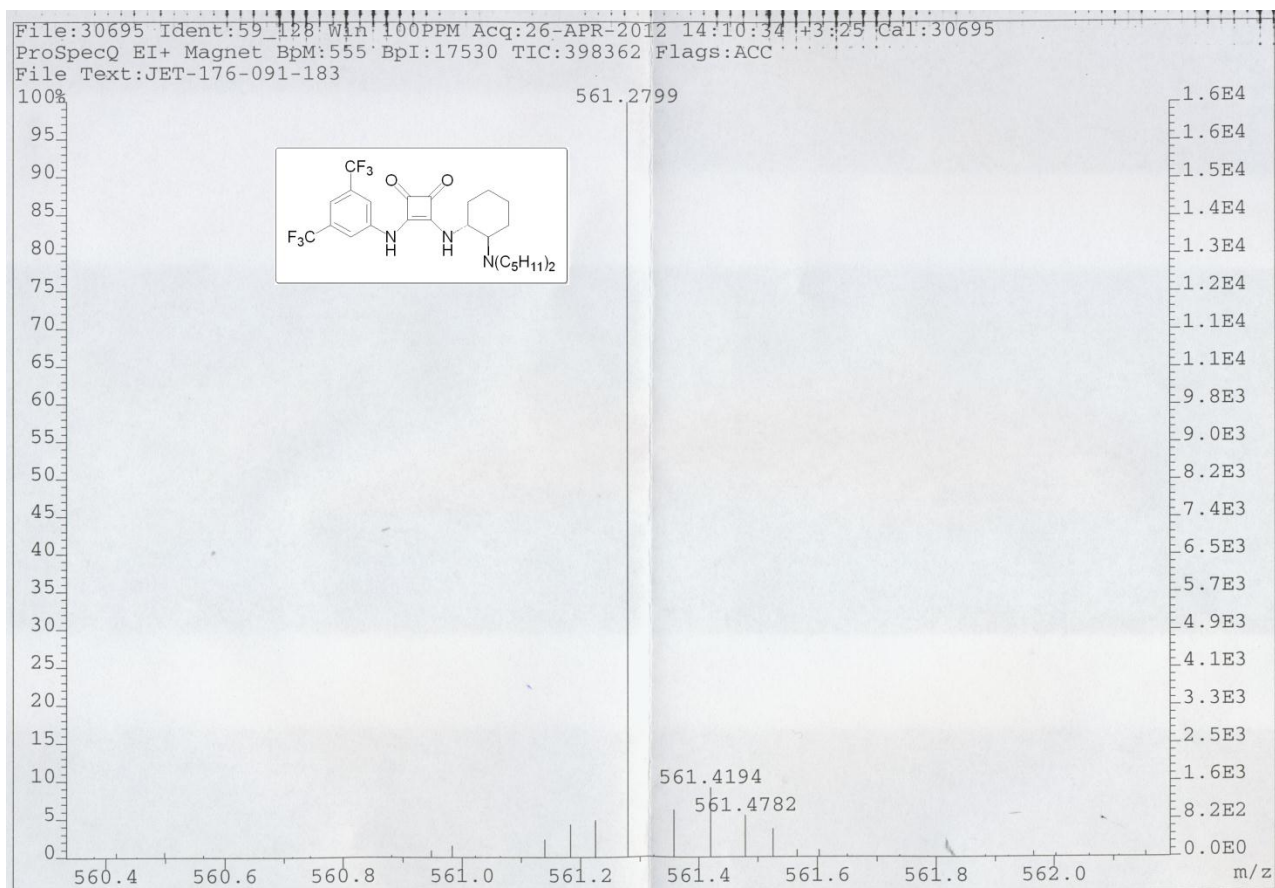

Figure S-16 HRMS spectrum of compound 6b.



## Preparation of Starting Materials

*General procedure for the preparation of  $\gamma$ - and  $\delta$ -unsaturated acids:* **Step 1.** 4-Aryl-4-oxobutanoic acid (1.0 equiv.) or 5-aryl-5-oxopentanoic acid (1.0 equiv.) was suspended in MeOH (0.25 M), the suspension was cooled to 0 °C and acetyl chloride (1.2 equiv.) was added. Cooling was discontinued and the resulting homogeneous mixture was stirred overnight at ambient temperature. The mixture was diluted with CH<sub>2</sub>Cl<sub>2</sub> and washed in succession with satd. aq. NaHCO<sub>3</sub>, brine and water. The organic phase was dried over MgSO<sub>4</sub>, filtered and the solvent was evaporated *in vacuo* to afford the corresponding 4-aryl-4-oxobutanoic acid methyl ester or 5-aryl-5-oxopentanoic acid methyl ester. **Step 2.** Triphenylphosphonium bromide (1.3 equiv.) was suspended in THF (0.75 M) and cooled to 0 °C, whereupon KHMDs (0.5 M in toluene, 1.3 equiv.) was added in one go. The resulting mixture was stirred for 1 hour then cooled to -78 °C and a solution of the 4-aryl-4-oxobutanoic acid methyl ester or 5-aryl-5-oxopentanoic acid methyl ester (1.0 equiv.) in THF (~0.25 M) was added in a dropwise manner. Cooling was discontinued and the resulting mixture was stirred at ambient temperature until TLC indicated full conversion of the starting material. The mixture was treated with satd. aq. NH<sub>4</sub>Cl and extracted with EtOAc. The combined organic extracts were dried over MgSO<sub>4</sub>, filtered and the solvent was evaporated *in vacuo*. The residue was purified by flash chromatography on silica (hexanes, followed by hexanes/EtOAc in various proportions) to afford the corresponding 4-aryl-4-oxobutanoic acid methyl ester or 5-arylhex-5-enoic acid methyl ester. **Step 3.** 4-Arylpent-4-enoic methyl ester or 5-arylhex-5-enoic acid methyl ester (1.0 equiv.) was dissolved in THF and water was added (8:1 THF/water, ~0.10 M), followed by LiOH·H<sub>2</sub>O (1.5 equiv.). The resulting biphasic mixture was stirred vigorously overnight at ambient temperature, whereupon the solvent was evaporated *in vacuo*. The residue was dissolved in 1 M aq. NaOH and washed with CH<sub>2</sub>Cl<sub>2</sub>. The pH was adjusted to approx. 2 and the aq. phase was extracted twice with CH<sub>2</sub>Cl<sub>2</sub>. The combined organic extracts were dried over MgSO<sub>4</sub>, filtered and evaporated *in vacuo* to afford the corresponding 4-arylpent-4-enoic acid or 5-arylhex-5-enoic acid, respectively.

Alternatively, some of the  $\gamma$ - and  $\delta$ -unsaturated acids were prepared directly from the corresponding 4-aryl-4-oxobutanoic acids or 5-aryl-5-oxopentanoic acids according to the procedure of Takemiya *et al.*<sup>5</sup>

### 5-Phenylhex-5-enoic acid (**1a**).<sup>4</sup>

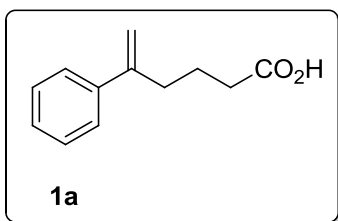

Prepared from commercially available 5-oxo-5-phenylpentanoic acid (**15a**) by a Wittig reaction according to the procedure of Takemiya *et al.*<sup>5</sup> All physical data were in full agreement with those reported in the literature. <sup>1</sup>H NMR (400 MHz, CDCl<sub>3</sub>)  $\delta$  11.82 (s, 1H), 7.15 – 7.63 (m, 5H), 5.34 (s, 1H), 5.11 (s, 1H), 2.61 (t,  $J$  = 7.5 Hz, 2H), 2.41 (t,  $J$  = 7.4 Hz, 2H), 1.83 (p,  $J$  = 7.4 Hz, 2H); <sup>13</sup>C NMR (101 MHz, CDCl<sub>3</sub>)  $\delta$  180.2, 147.3, 140.7, 128.3 (2C), 127.5, 126.1 (2C), 113.1, 34.4, 33.3, 23.0.

### 5-(Naphthalen-2-yl)hex-5-enoic acid (**1b**).<sup>4</sup>

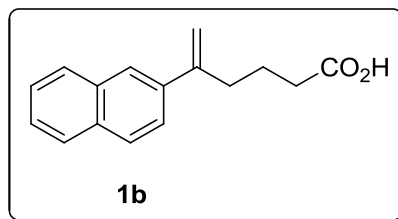

Prepared according to the general procedure using 5-(naphthalen-2-yl)-5-oxopentanoic acid (**15b**). All physical data were in full agreement with those reported in the literature. <sup>1</sup>H NMR (300 MHz, CDCl<sub>3</sub>)  $\delta$  11.23 (bs, 1H), 7.77–7.96 (m, 4H), 7.61 (dd,  $J$  = 8.6, 1.8 Hz, 1H), 7.42 – 7.56 (m, 2H), 5.51 (d,  $J$  = 1.3 Hz, 1H), 5.23 (d,  $J$  = 1.5 Hz, 1H), 2.73 (t,  $J$  = 7.5 Hz, 2H), 2.45 (t,  $J$  = 7.4 Hz, 2H), 1.89 (p,  $J$  = 7.4 Hz, 1H); <sup>13</sup>C NMR (75 MHz, CDCl<sub>3</sub>)  $\delta$  180.1, 147.1, 137.9, 133.4, 132.8, 128.1, 127.9, 127.5, 126.1, 125.8, 124.7, 124.5, 113.6, 34.4, 33.3, 23.1.

#### 5-(*p*-Tolyl)hex-5-enoic acid (**1c**).<sup>4</sup>

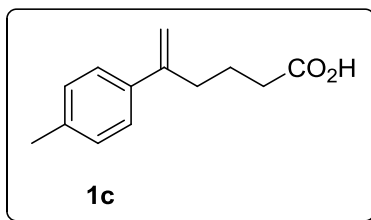

Prepared according to the general procedure using 5-oxo-5-(*p*-tolyl)pentanoic acid (**15c**). All physical data were in full agreement with those reported in the literature. <sup>1</sup>H NMR (400 MHz, DMSO-*d*<sub>6</sub>) δ 7.34 (d, *J* = 8.0 Hz, 2H), 7.15 (d, *J* = 7.9 Hz, 2H), 5.29 (d, *J* = 2.0 Hz, 1H), 5.01 (d, *J* = 1.9 Hz, 1H), 2.48 (t, *J* = 7.4 Hz, 2H), 2.29 (s, 3H), 2.22 (t, *J* = 7.4 Hz, 2H), 1.60 (p, *J* = 7.4 Hz, 2H). <sup>13</sup>C NMR (101 MHz, DMSO-*d*<sub>6</sub>) δ 174.3, 147.0, 137.2, 136.8, 129.0 (2C), 125.7 (2C), 111.8, 33.8, 33.0, 23.2, 20.7.

#### 5-(4-Methoxyphenyl)hex-5-enoic acid (**1d**).<sup>4</sup>

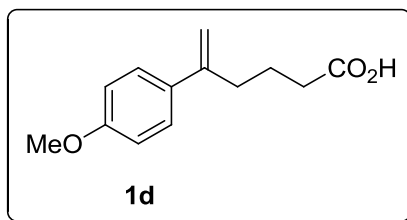

Prepared according to the general procedure using 5-(4-methoxyphenyl)-5-oxopentanoic acid (**15d**). All physical data were in full agreement with those reported in the literature. <sup>1</sup>H NMR (300 MHz, CDCl<sub>3</sub>) δ 7.31 – 7.41 (m, 2H), 6.84 – 6.91 (m, 2H), 5.25 (d, *J* = 1.4 Hz, 1H), 5.01 (d, *J* = 1.4 Hz, 1H), 3.82 (s, 3H), 2.56 (t, *J* = 7.4 Hz, 2H), 2.39 (t, *J* = 7.4 Hz, 2H), 1.81 (p, *J* = 7.5 Hz, 2H). <sup>13</sup>C NMR (75 MHz, CDCl<sub>3</sub>) δ 179.5, 159.1, 146.5, 133.1, 127.2 (2C), 113.7 (2C), 111.5, 55.3, 34.5, 33.2, 23.1.

#### 5-(4-Fluorophenyl)hex-5-enoic acid (**1e**).<sup>4</sup>

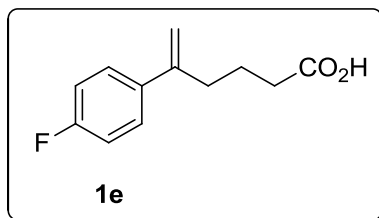

Prepared according to the general procedure using 5-(4-fluorophenyl)-5-oxopentanoic acid (**15e**). All physical data were in full agreement with those reported in the literature. <sup>1</sup>H NMR (300 MHz, CDCl<sub>3</sub>) δ 11.35 (bs, 1H), 7.32 – 7.45 (m, 2H), 6.97 – 7.08 (m, 2H), 5.24 – 5.30 (m, 1H), 5.04 – 5.11 (m, 1H), 2.56 (t, *J* = 7.5 Hz, 1H), 2.39 (t, *J* = 7.5 Hz, 1H), 1.80 (p, *J* = 7.5 Hz, 1H); <sup>13</sup>C NMR (75 MHz, CDCl<sub>3</sub>) δ 180.0, 162.3 (d, <sup>1</sup>*J*<sub>CF</sub> = 246 Hz), 146.3, 136.7 (d, <sup>4</sup>*J*<sub>CF</sub> = 3.3 Hz), 127.7 (d, <sup>3</sup>*J*<sub>CF</sub> = 7.9 Hz, 2C), 115.2 (d, <sup>2</sup>*J*<sub>CF</sub> = 21.3 Hz, 2C), 113.0, 34.5, 33.2, 22.9.

#### 5-(4-Chlorophenyl)hex-5-enoic acid (**1f**).<sup>4</sup>

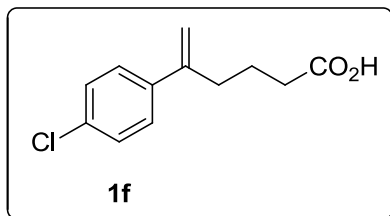

Prepared from 5-(4-chlorophenyl)-5-oxopentanoic acid (**15f**) by a Wittig reaction according to the procedure of Takemiya *et al.*<sup>5</sup> All physical data were in full agreement with those reported in the literature. <sup>1</sup>H NMR (400 MHz, CDCl<sub>3</sub>) δ 9.76 (bs, 1H), 7.28 – 7.38 (m, 4H), 5.31 (d, *J* = 1.3 Hz, 1H), 5.11 (d, *J* = 2.0 Hz, 1H), 2.55 (t, *J* = 7.5 Hz, 2H), 2.39 (t, *J* = 7.4 Hz, 2H), 1.79 (p, *J* = 7.4 Hz, 2H); <sup>13</sup>C NMR (101 MHz, CDCl<sub>3</sub>) δ 179.6, 146.2, 139.1, 133.3, 128.5 (2C), 127.4 (2C), 113.6, 34.3, 33.2, 22.9.

#### 5-(4-Bromophenyl)hex-5-enoic acid (**1g**).<sup>4</sup>

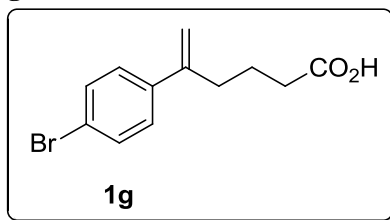

Prepared according to the general procedure using 5-(4-bromophenyl)-5-oxopentanoic acid (**15g**). All physical data were in full agreement with those reported in the literature. <sup>1</sup>H NMR (300 MHz, CDCl<sub>3</sub>) δ 11.44 (bs, 1H), 7.42–7.52 (m, 2H), 7.24–7.33 (m, 2H), 5.33 (s, 1H), 5.12 (s, 1H), 2.56 (t, *J* = 7.5 Hz, 2H), 2.40 (t, *J* = 7.4 Hz, 2H), 1.80 (p, *J* = 7.4 Hz, 2H); <sup>13</sup>C NMR (75 MHz, CDCl<sub>3</sub>) δ 180.0, 146.2, 139.5, 131.4 (2C), 127.7 (2C), 121.4, 113.6, 34.2, 33.2, 22.9.

#### 6-Methyl-5-methyleneheptanoic acid (**1h**).<sup>4,5</sup>

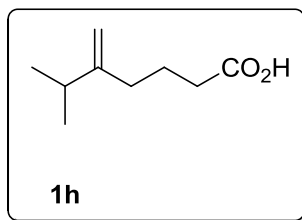

Prepared from commercially available 6-methyl-5-methyleneheptanoic acid (**15h**) by a Wittig reaction according to the procedure of Takemiya *et al.*<sup>5</sup> All physical data were in full agreement with those reported in the literature. <sup>1</sup>H NMR (300 MHz, CDCl<sub>3</sub>) δ 11.09 (bs, 1H), 4.76–4.83 (m, 1H), 4.67–4.74 (m, 1H), 2.38 (t, *J* = 7.5 Hz, 2H), 2.24 (hept, *J* = 7.0 Hz, 1H), 2.09 (t, *J* = 7.5 Hz, 2H), 1.80 (p, *J* = 7.5 Hz, 2H), 1.03 (d, *J* = 7.0 Hz, 6H); <sup>13</sup>C NMR (75 MHz, CDCl<sub>3</sub>) δ 180.3, 154.6, 107.1, 33.6 (3C), 23.0, 21.8 (2C).

#### 4-Phenylpent-4-enoic acid (**3a**).<sup>4</sup>

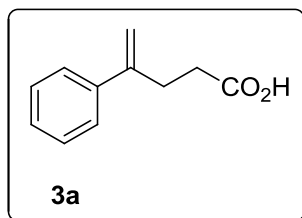

Prepared according to the general procedure using 4-oxo-4-phenylbutanoic acid (**16a**). All physical data were in full agreement with those reported in the literature. <sup>1</sup>H NMR (300 MHz, CDCl<sub>3</sub>) δ 10.56 (bs, 1H), 7.23–7.48 (m, 5H), 5.35 (s, 1H), 5.14 (s, 1H), 2.88 (t, *J* = 7.7 Hz, 2H), 2.56 (t, *J* = 7.7 Hz, 2H); <sup>13</sup>C NMR (75 MHz, CDCl<sub>3</sub>) δ 179.5, 146.5, 140.4, 128.4 (2C), 127.7, 126.1 (2C), 112.9, 33.0, 30.1.

#### 4-(4-Chlorophenyl)pent-4-enoic acid (**3b**).<sup>6</sup>

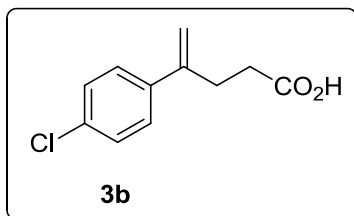

Prepared according to the general procedure using 4-(4-chlorophenyl)-4-oxobutanoic acid (**16b**). All physical data were in full agreement with those reported in the literature. <sup>1</sup>H NMR (300 MHz, CDCl<sub>3</sub>) δ 10.60 (bs, 1H), 7.28–7.38 (m, 4H), 5.32 (s, 1H), 5.14 (s, 1H), 2.83 (t, *J* = 7.7 Hz, 1H), 2.54 (t, *J* = 7.7 Hz, 2H); <sup>13</sup>C NMR (75 MHz, CDCl<sub>3</sub>) δ 179.3, 145.4, 138.8, 133.5, 128.6 (2C), 127.4 (2C), 113.5, 32.8, 30.0.

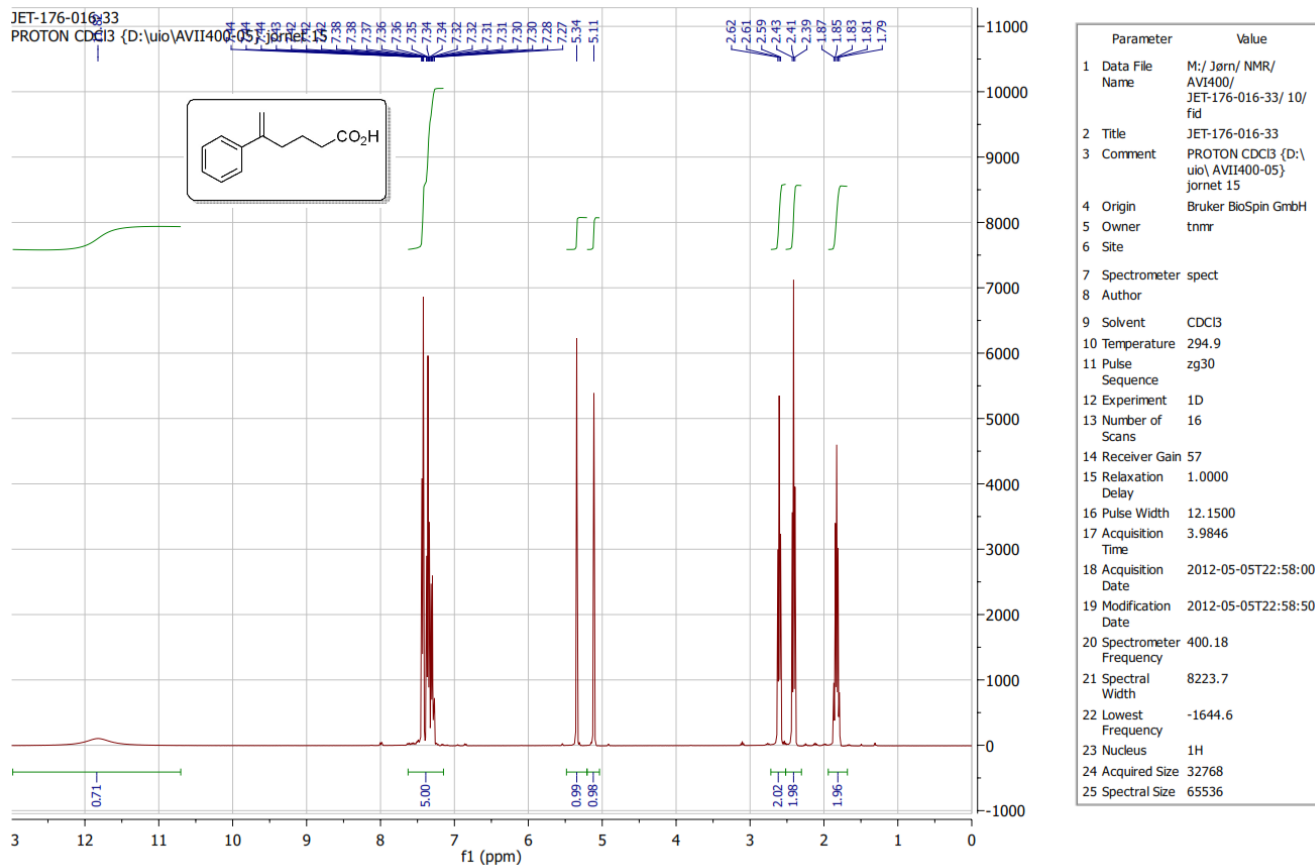

Figure S-17 <sup>1</sup>H-NMR spectrum of compound 1a.

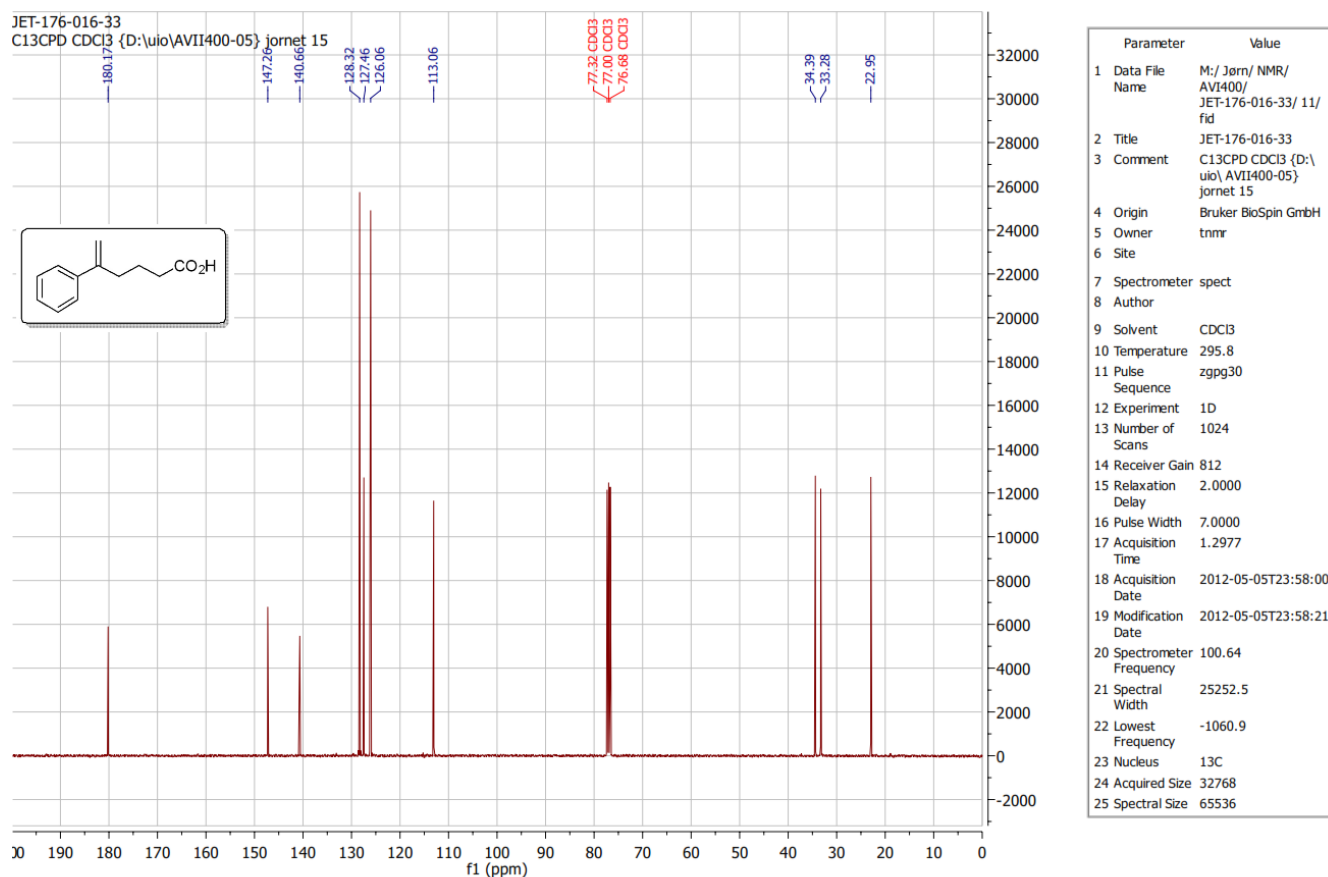

Figure S-18 <sup>13</sup>C-NMR spectrum of compound 1a.

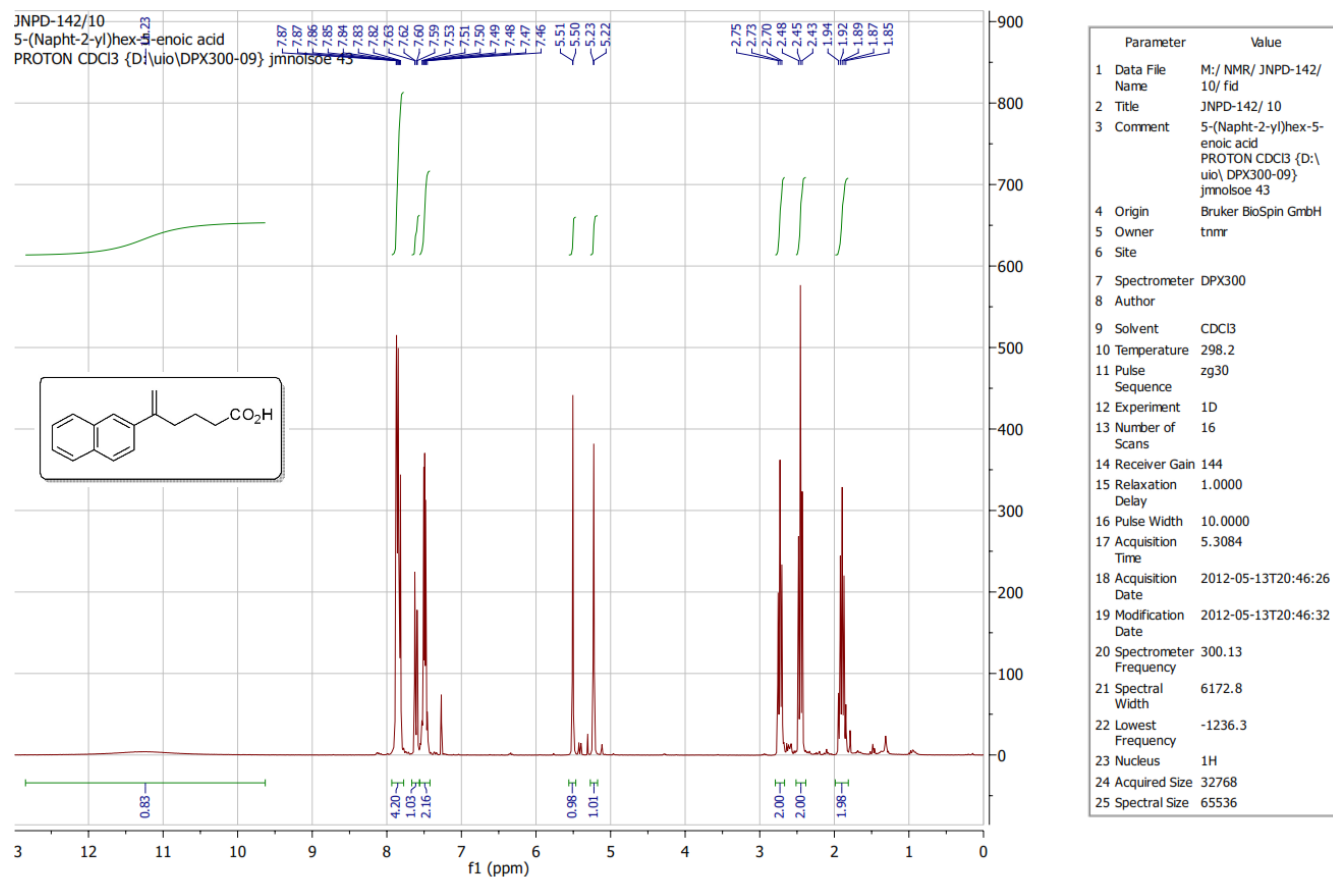

Figure S-19 <sup>1</sup>H-NMR spectrum of compound 1b.

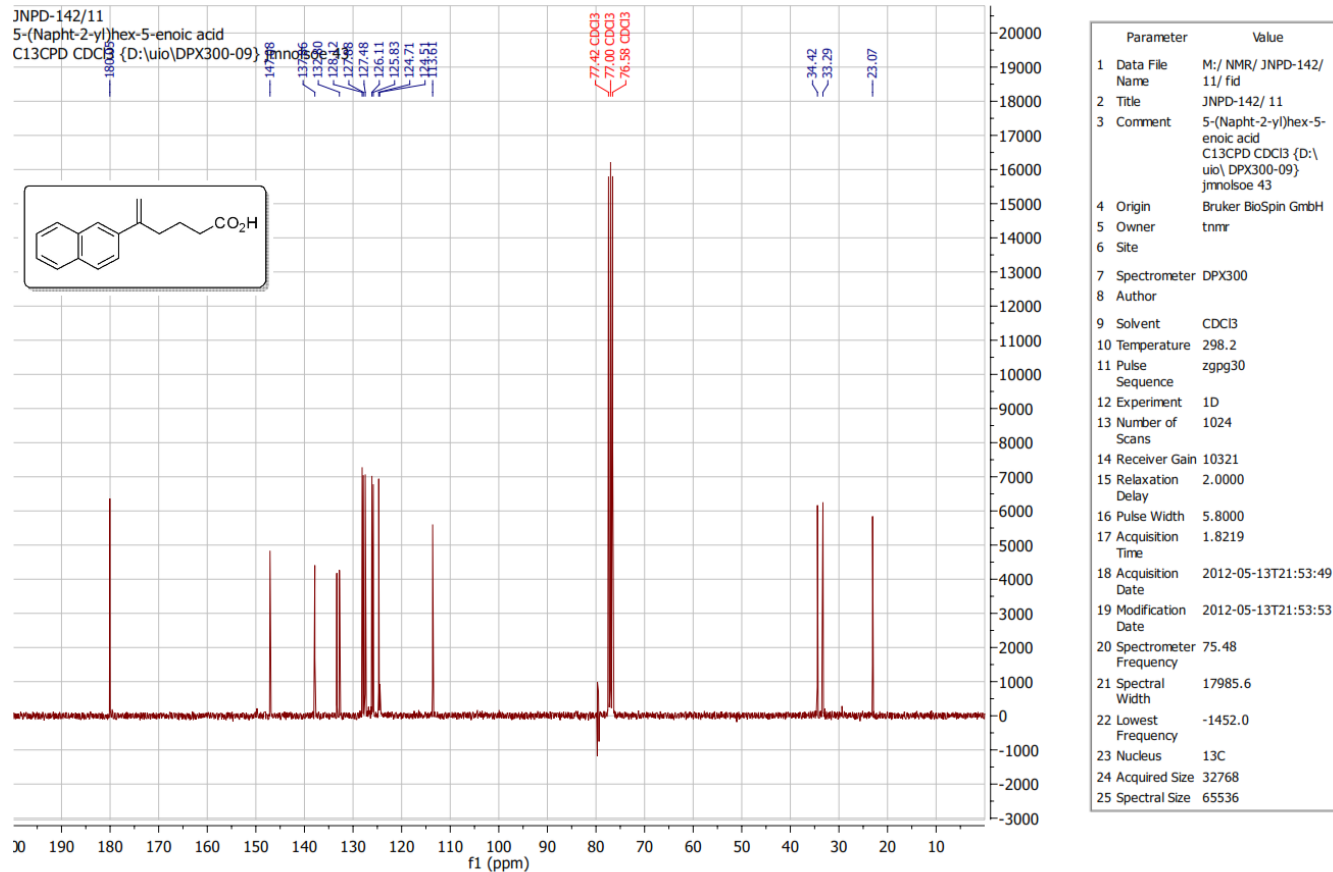

Figure S-20 <sup>13</sup>C-NMR spectrum of compound 1b.

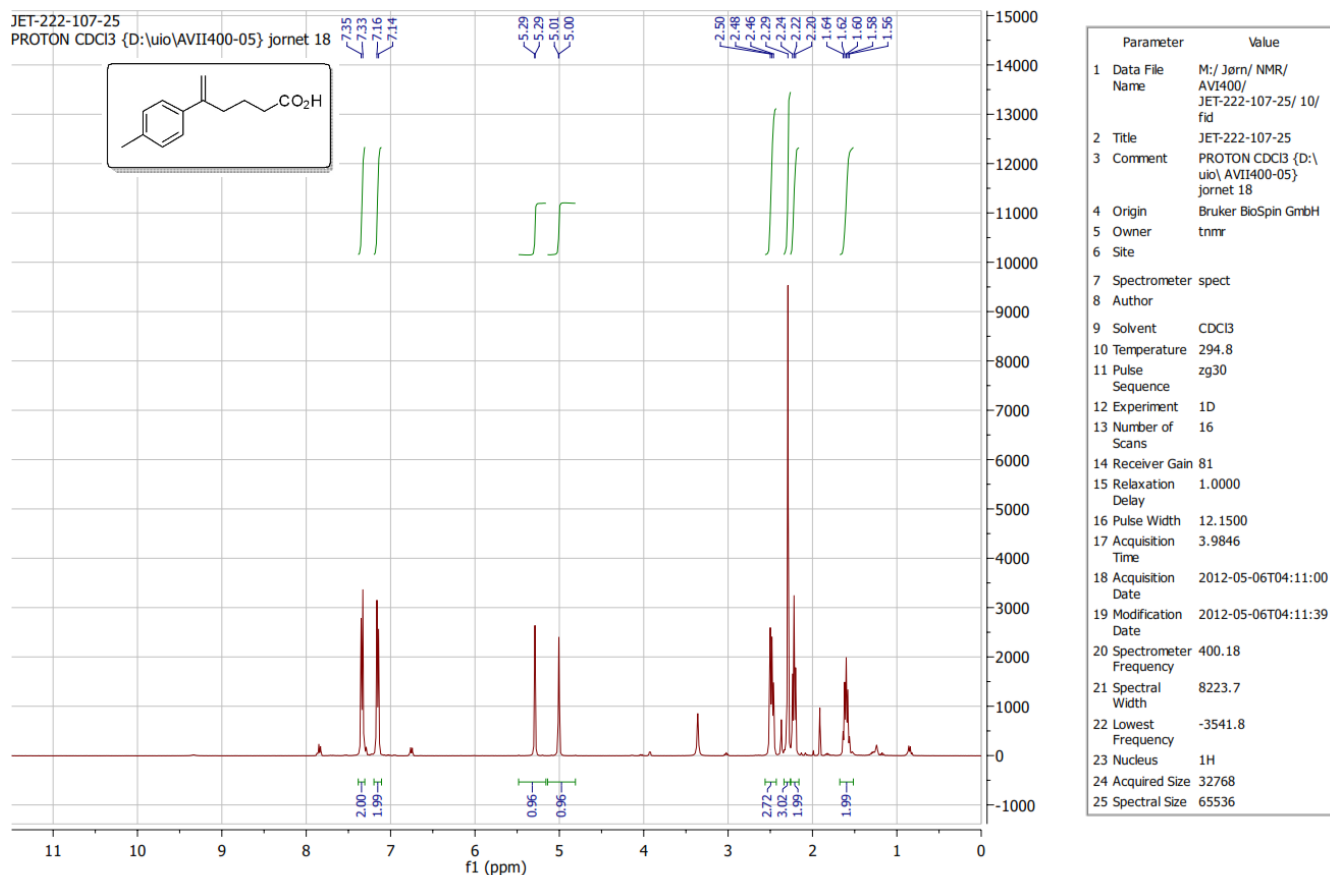

**Figure S-21** <sup>1</sup>H-NMR spectrum of compound 1c.

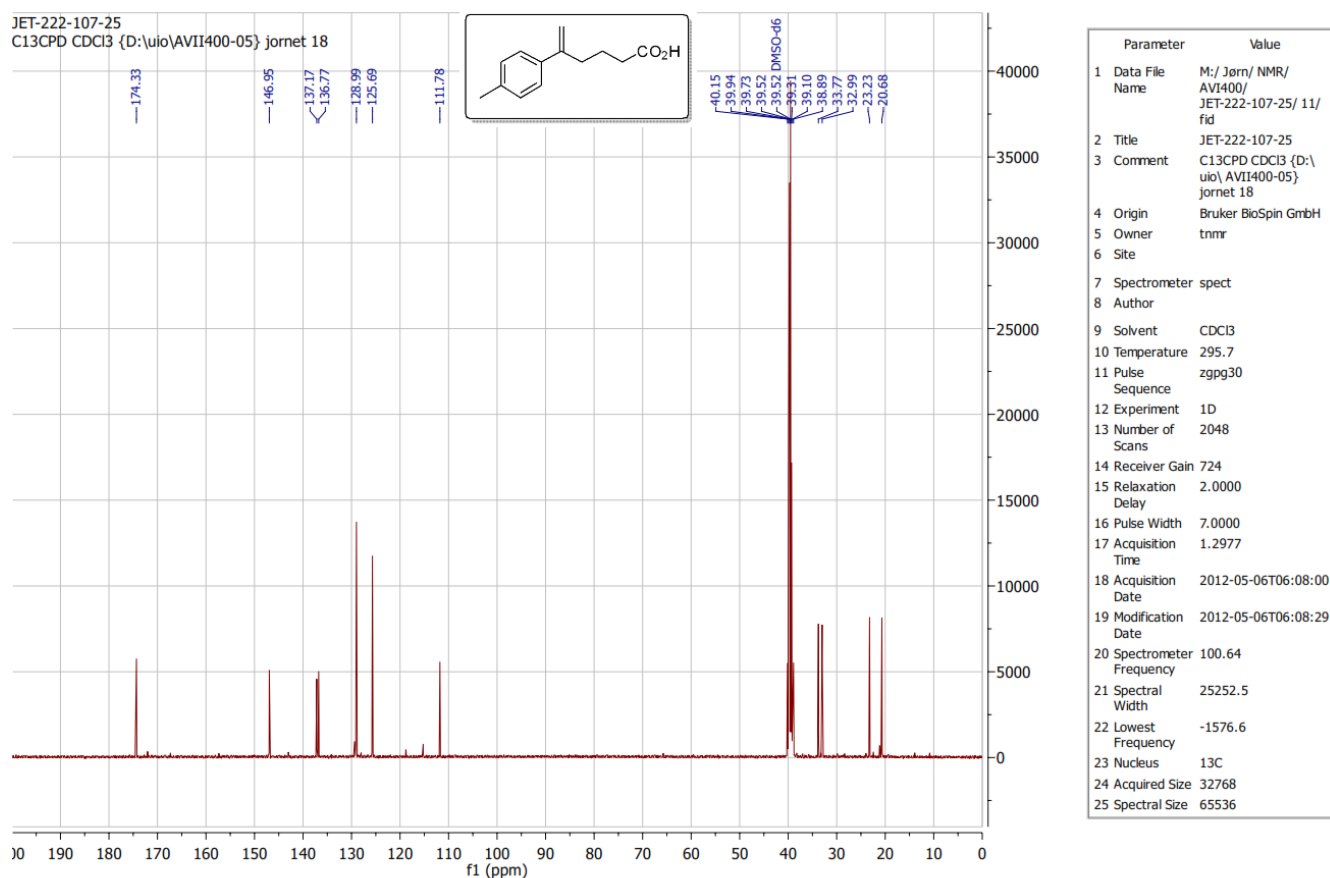

**Figure S-22** <sup>13</sup>C-NMR spectrum of compound 1c.

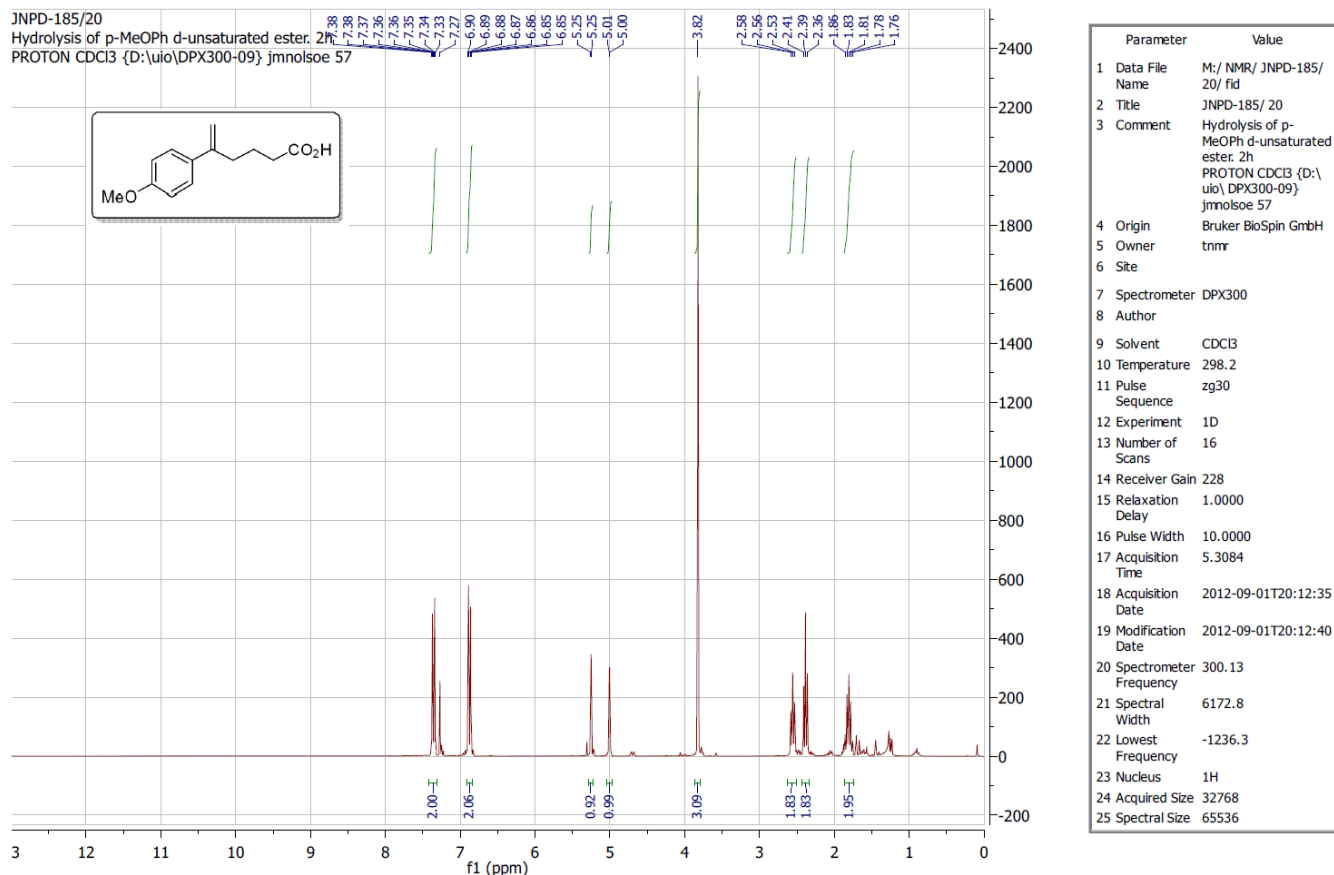

Figure S-23 <sup>1</sup>H-NMR spectrum of compound 1d.

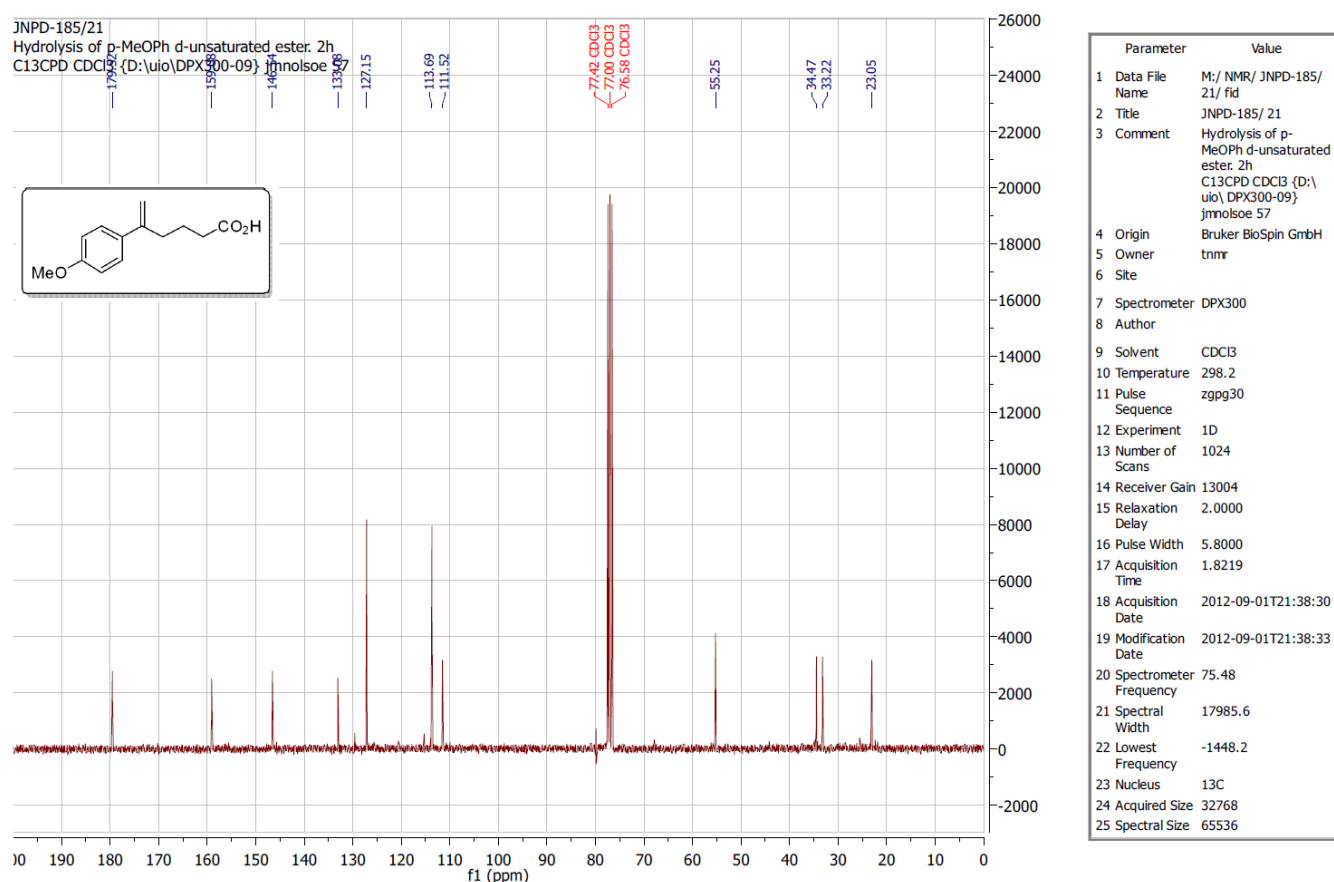

Figure S-24 <sup>13</sup>C-NMR spectrum of compound 1d.

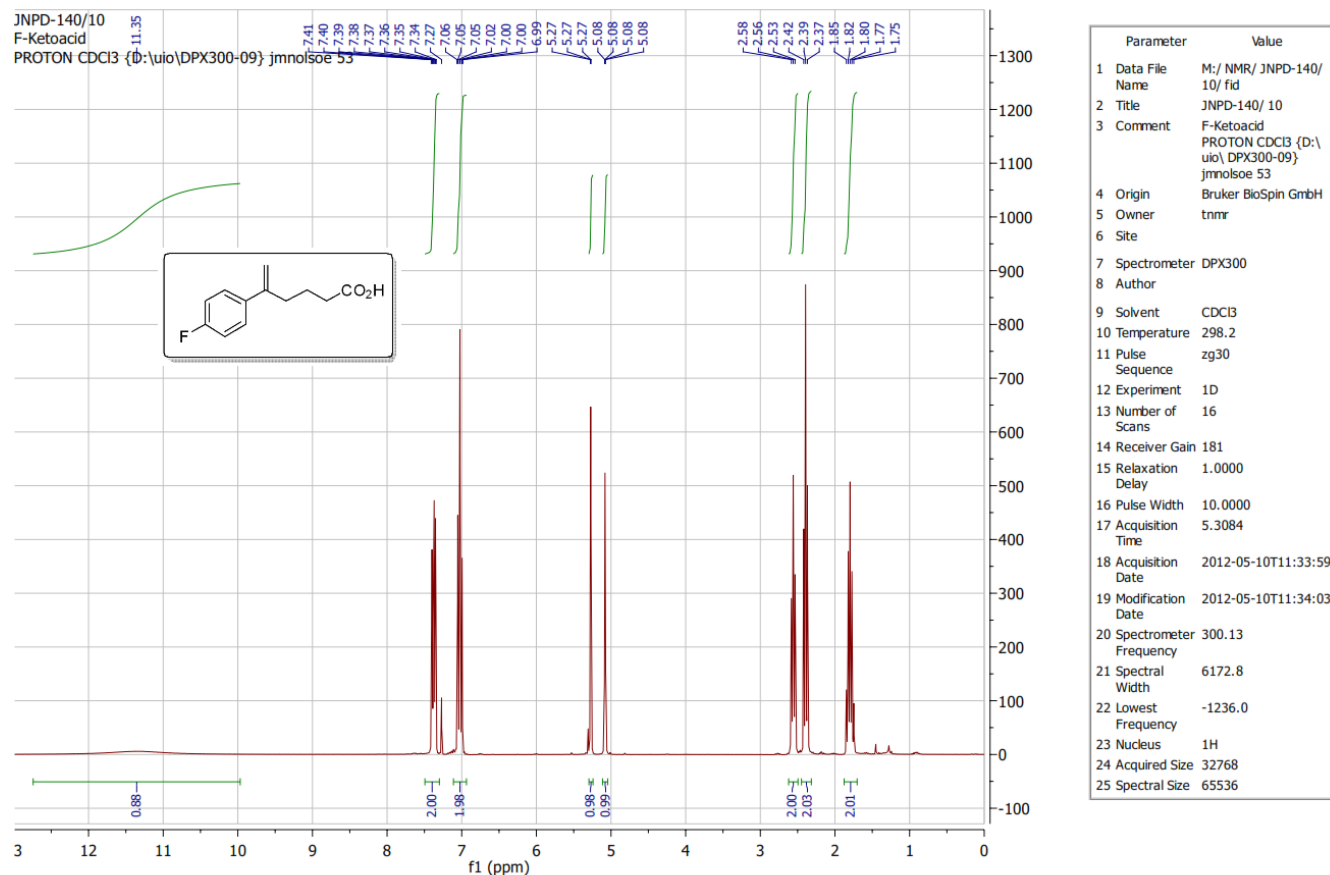

Figure S-25 <sup>1</sup>H-NMR spectrum of compound **1e**.

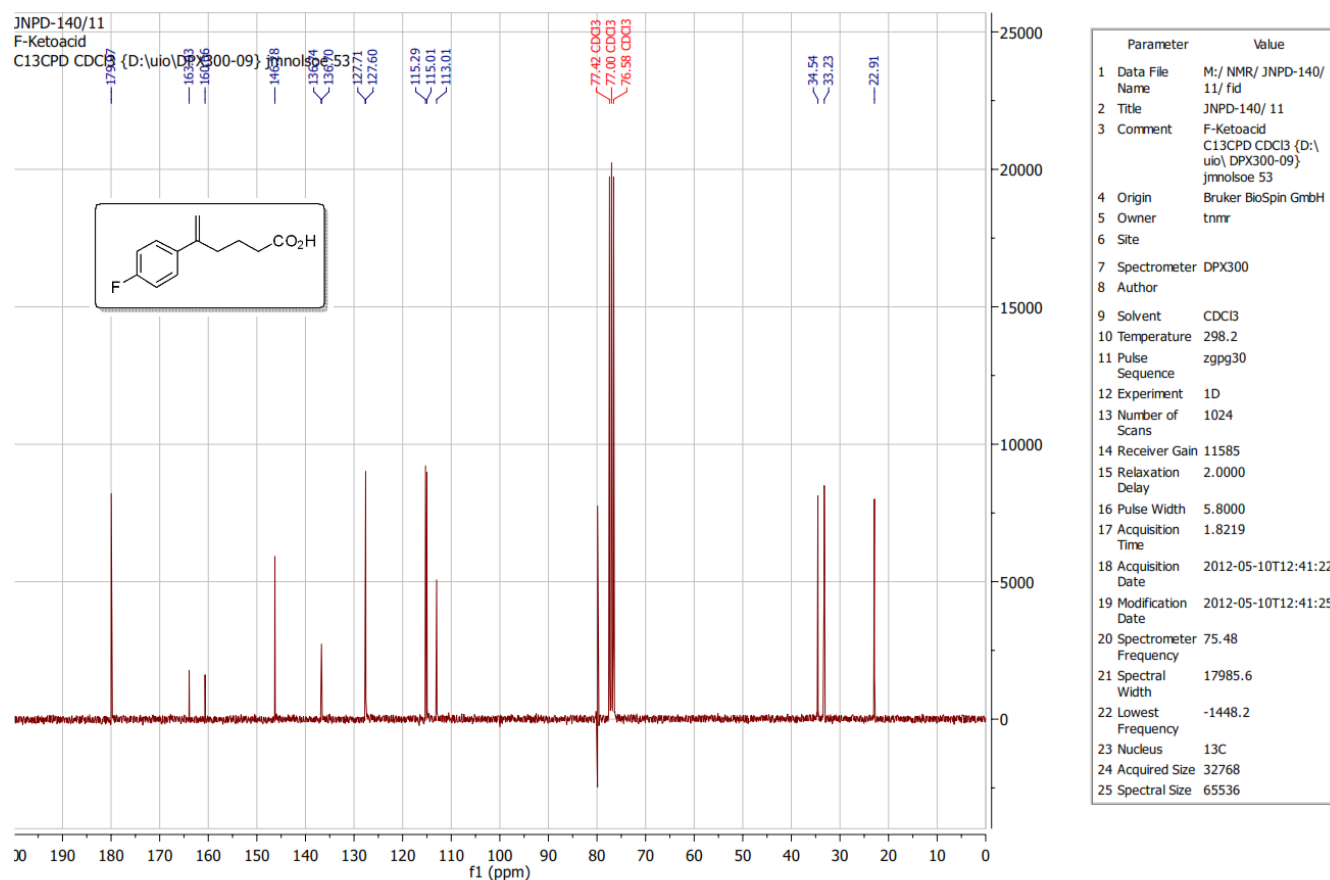

Figure S-26 <sup>13</sup>C-NMR spectrum of compound **1e**.



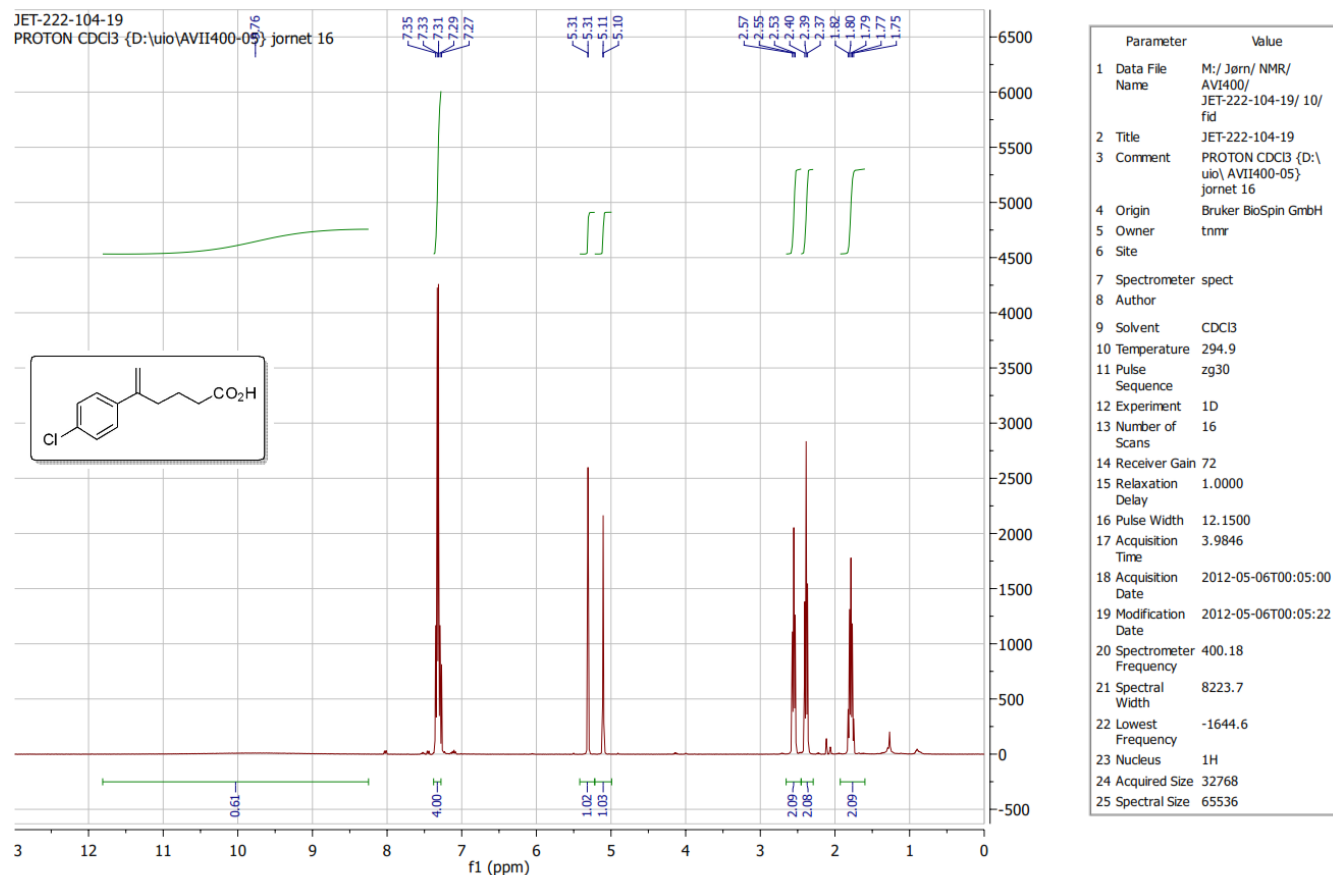

Figure S-27  $^1\text{H}$ -NMR spectrum of compound 1f.

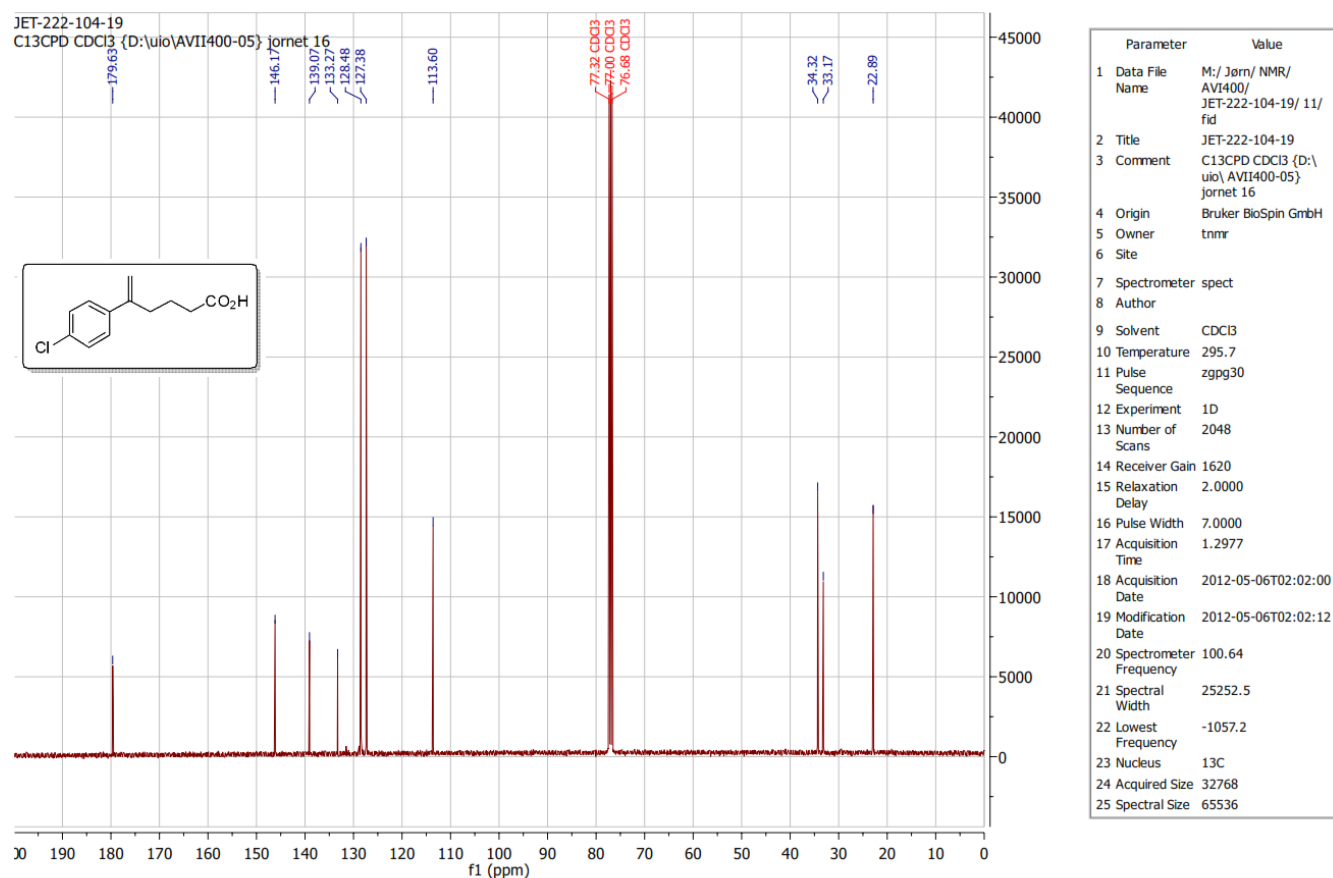

Figure S-28  $^{13}\text{C}$ -NMR spectrum of compound 1f.

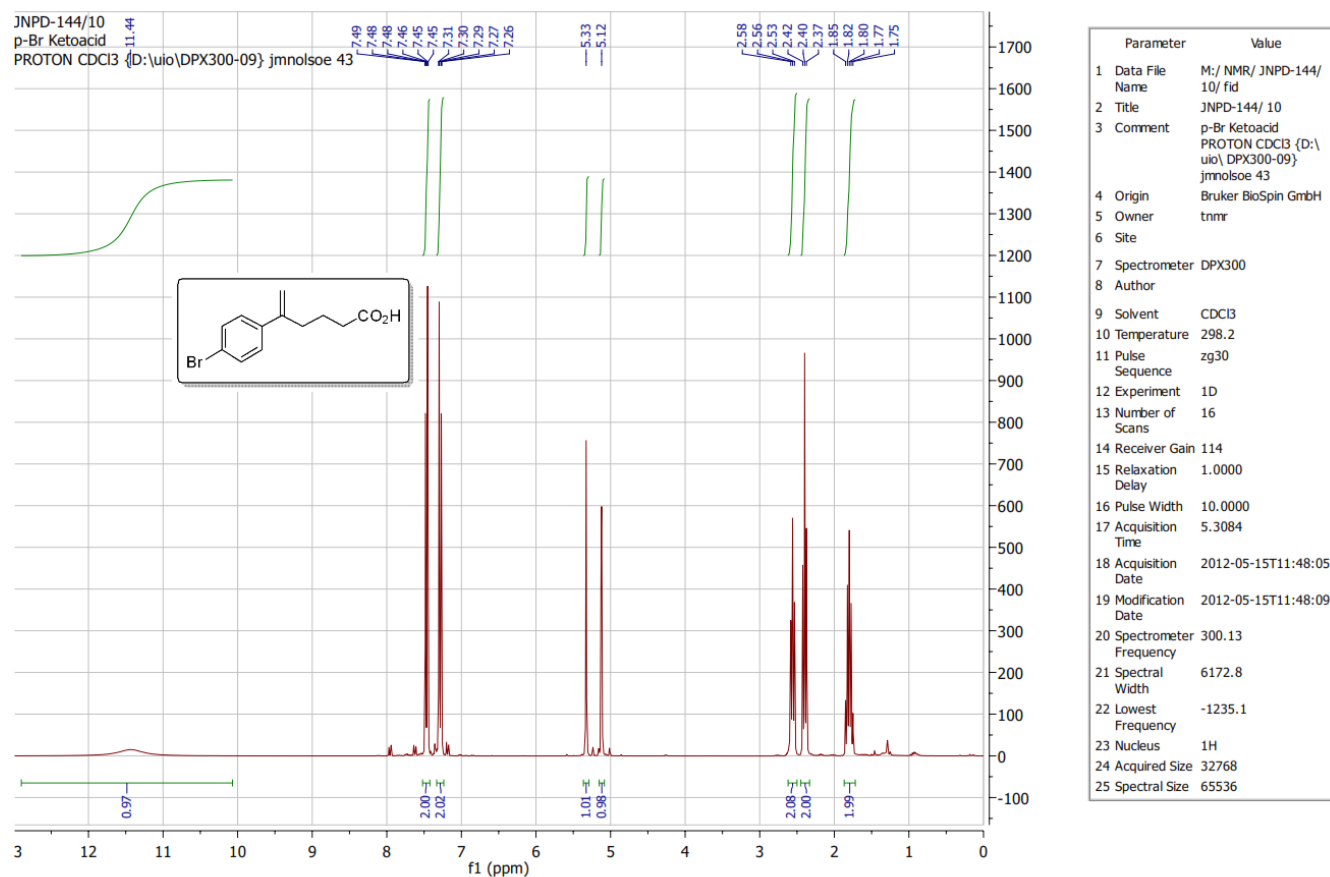

**Figure S-29** <sup>1</sup>H-NMR spectrum of compound **1g**.

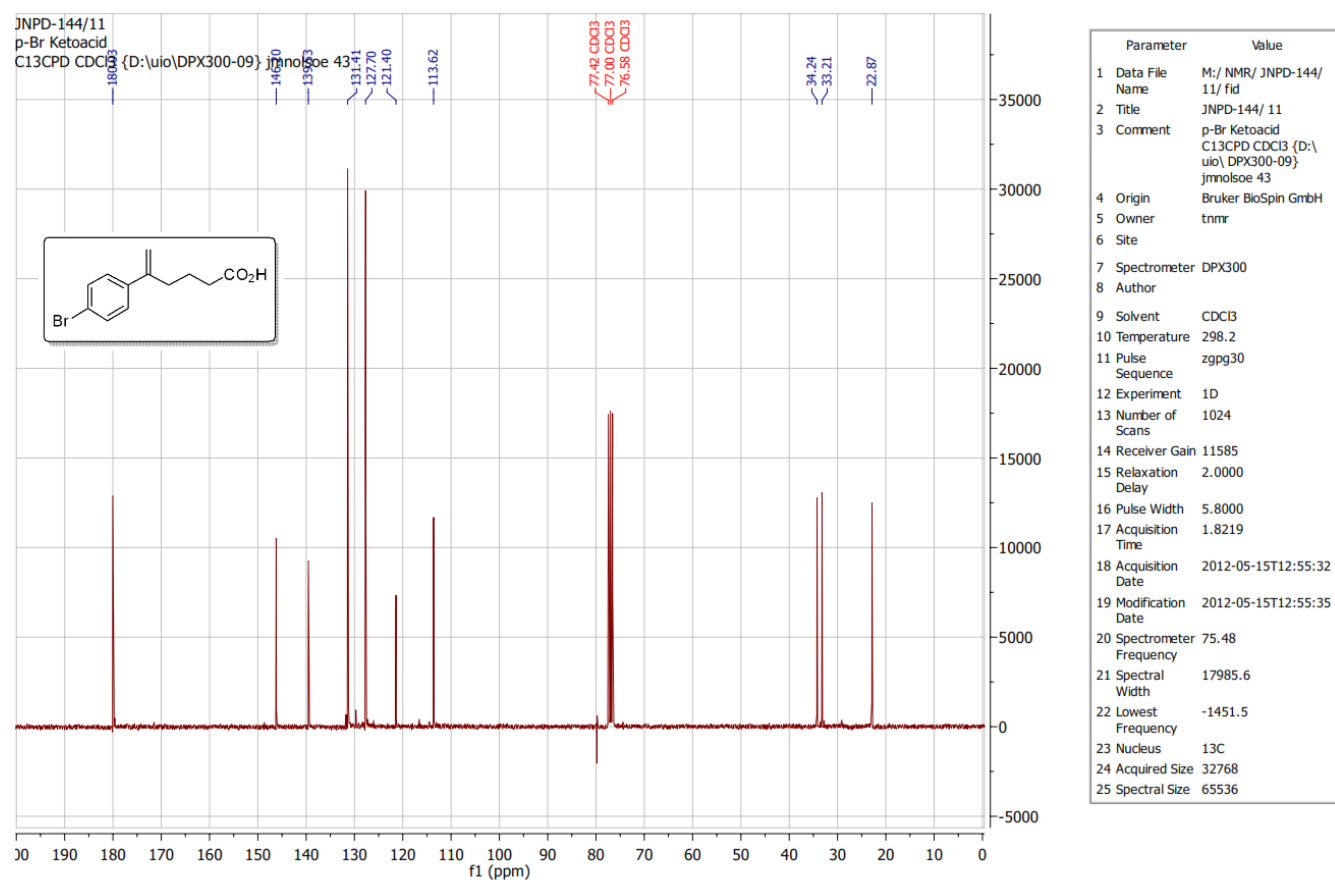

**Figure S-30** <sup>13</sup>C-NMR spectrum of compound **1g**.

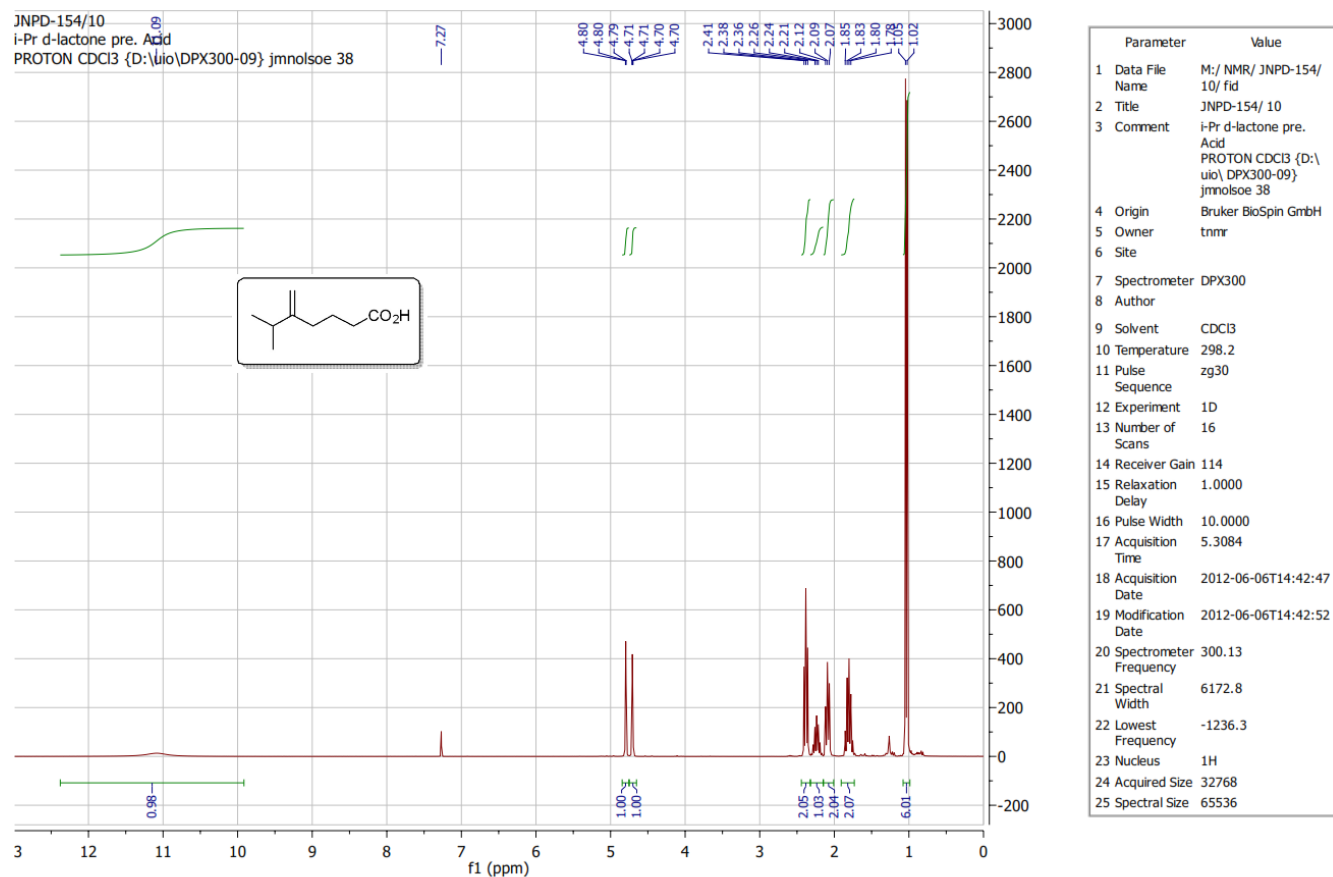

**Figure S-31** <sup>1</sup>H-NMR spectrum of compound **1h**.

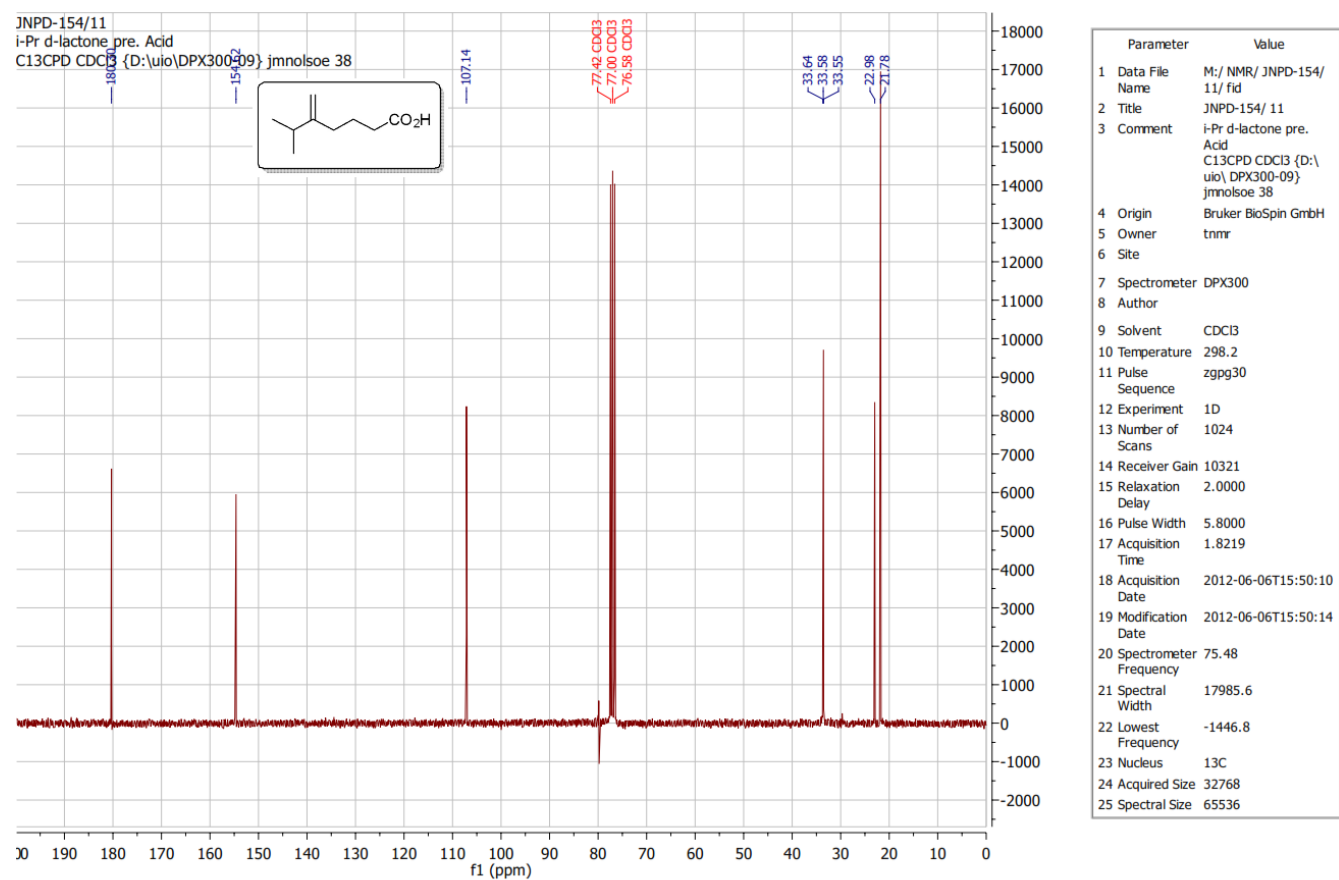

**Figure S-32** <sup>13</sup>C-NMR spectrum of compound **1h**.

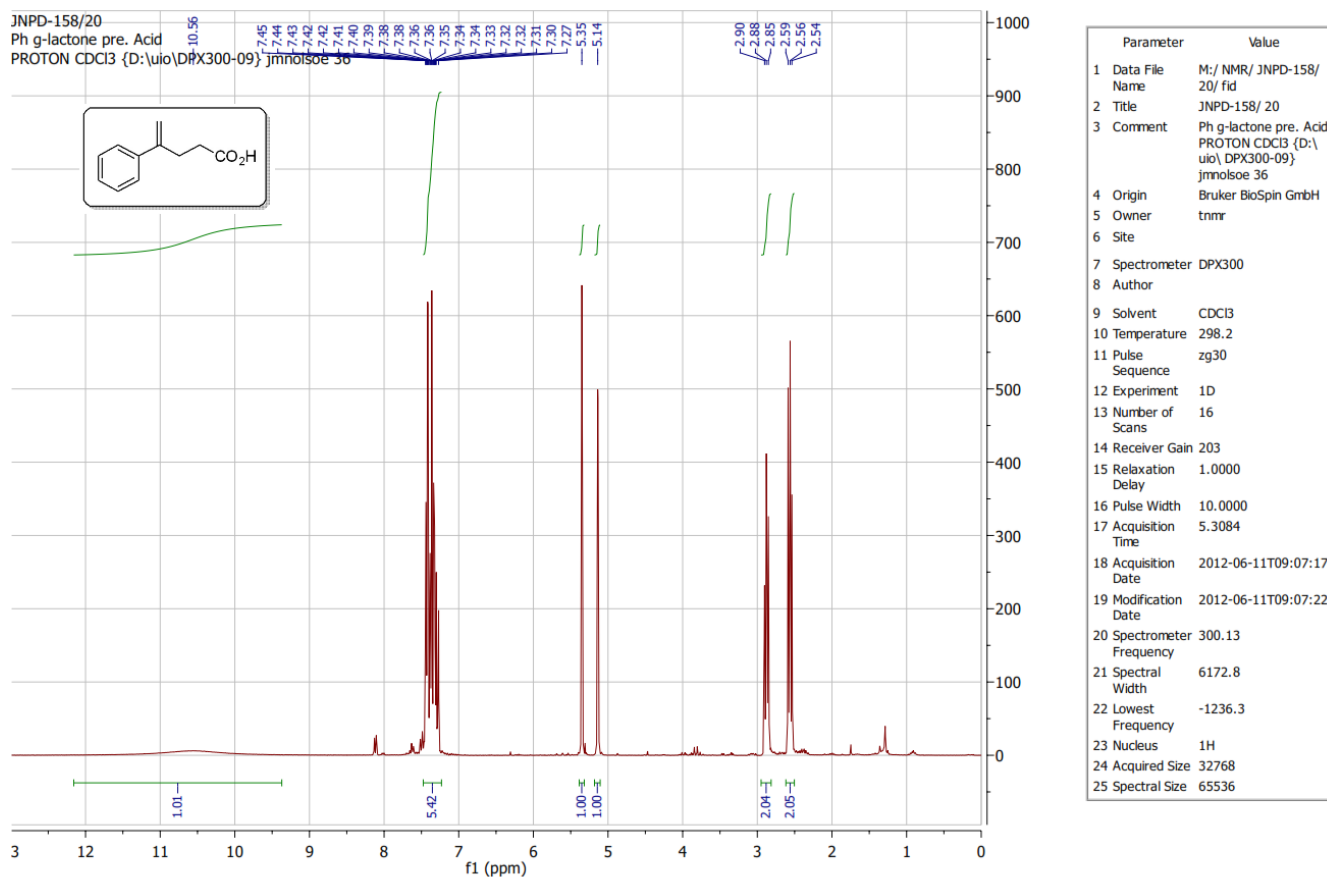

Figure S-33  $^1\text{H}$ -NMR spectrum of compound 3a.

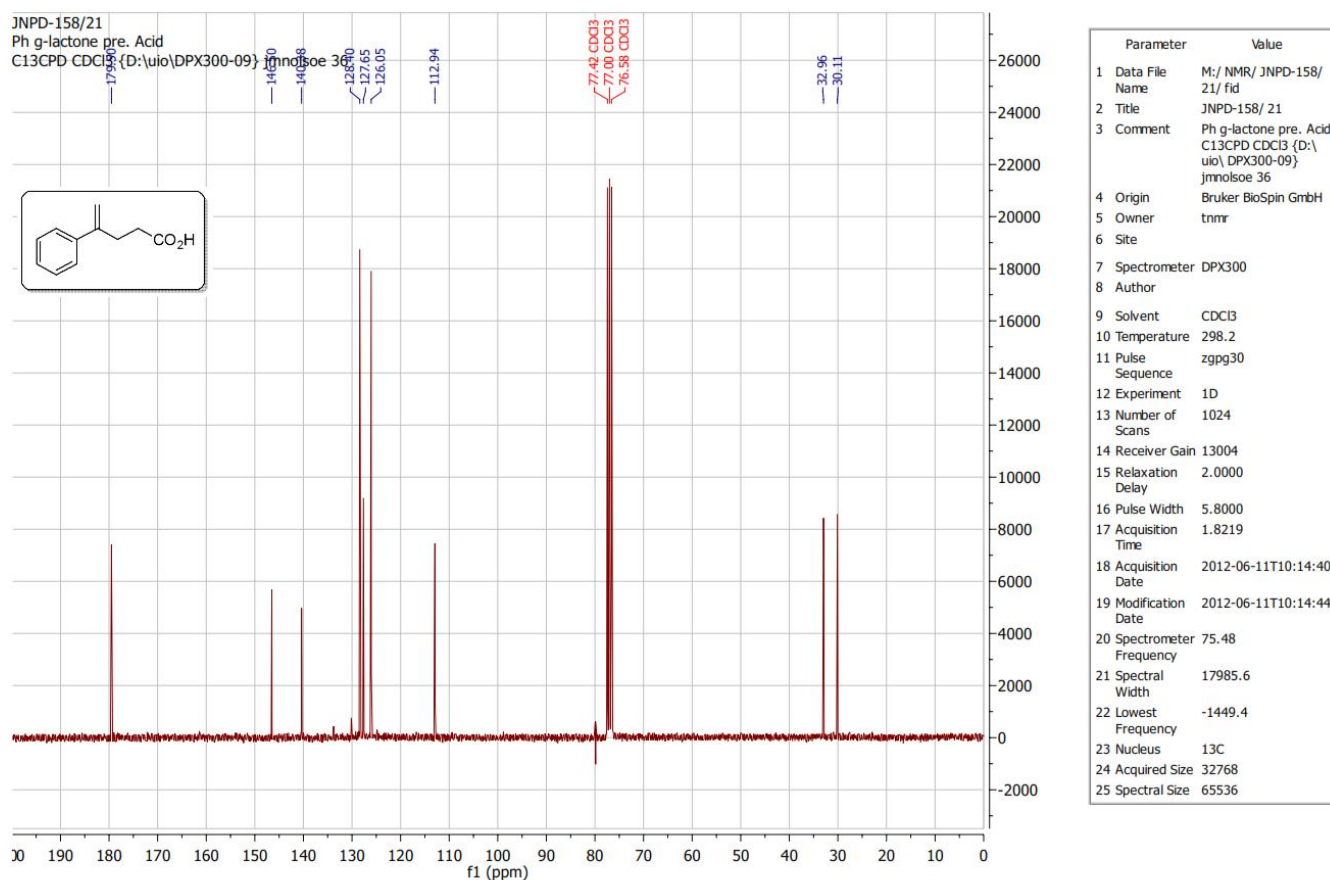

Figure S-34  $^{13}\text{C}$ -NMR spectrum of compound 3a.

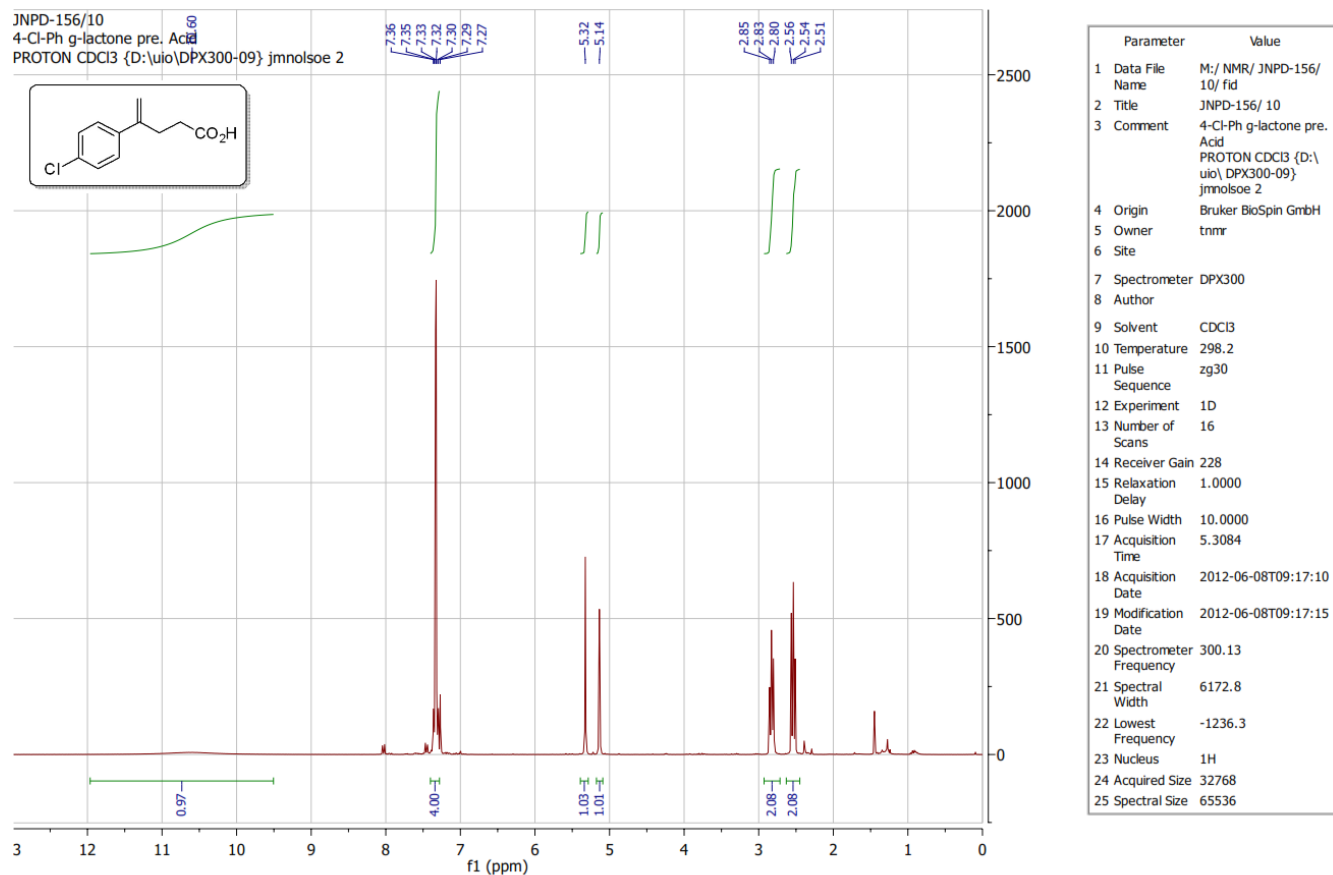

**Figure S-35** <sup>1</sup>H-NMR spectrum of compound **3b**.

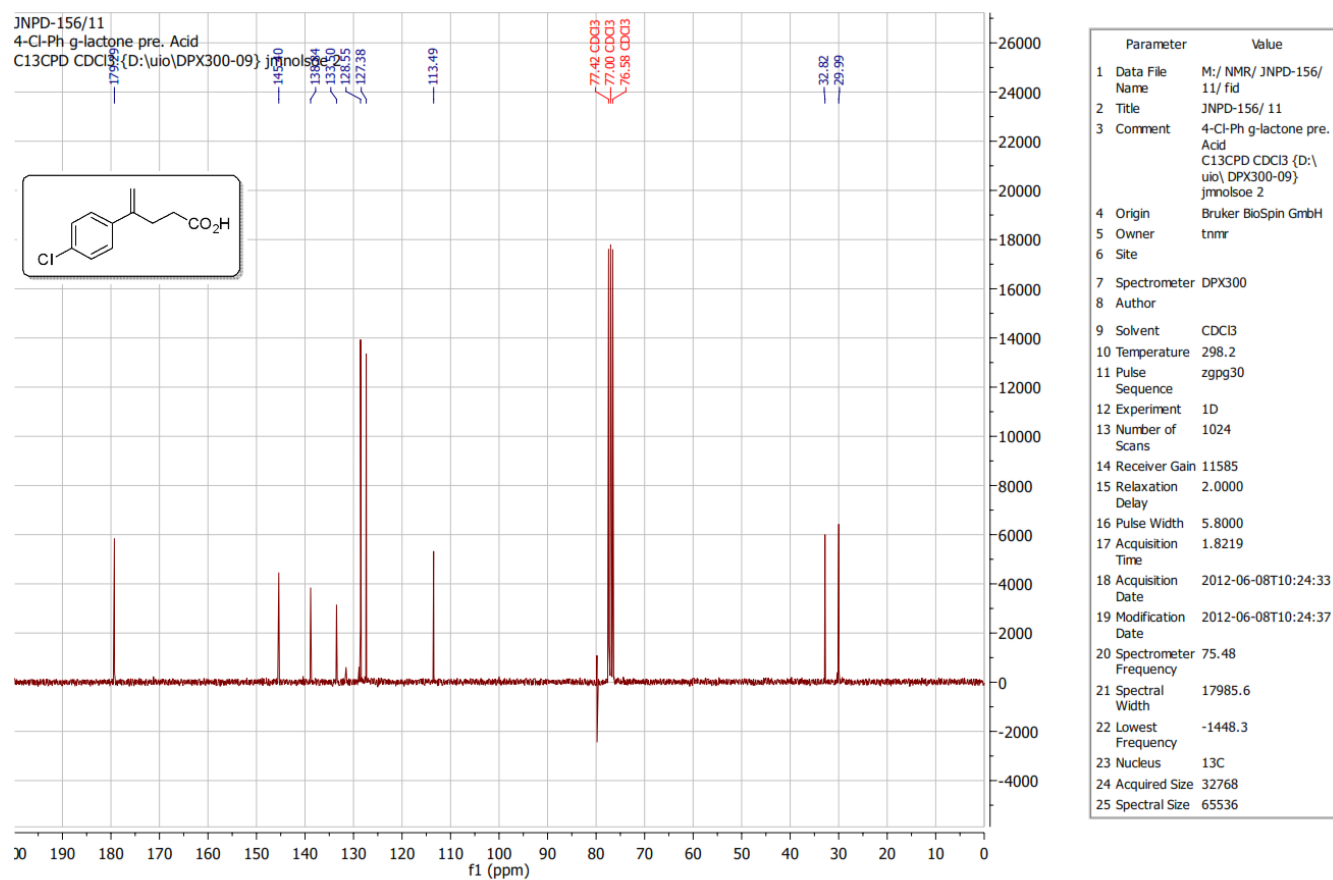

**Figure S-36** <sup>13</sup>C-NMR spectrum of compound **3b**.

## Enantioselective Iodolactonization Utilizing Chiral Squaramides

**General procedure for asymmetric iodolactonization with chiral squaramides:** Iodine (0.15 equiv.) and *N*-iodosuccinimide (1.0 equiv.) was dissolved in a combination of acetone/ $\text{CH}_2\text{Cl}_2$  (1:1, 0.20 M). Subsequently, the squaramide **5-8** (0.15 equiv.) was added and the resulting mixture was cooled to  $-78^\circ\text{C}$ . A solution of unsaturated acid **1** or **3** (1.0 equiv.) in a combination of acetone/ $\text{CH}_2\text{Cl}_2$  (1:1, 0.20 M) was added and the resulting mixture was stirred at  $-78^\circ\text{C}$  for 24 hours. The reaction mixture was treated with satd. aq.  $\text{Na}_2\text{S}_2\text{O}_3$  (10 ml) while still in the cold, allowed to equilibrate to ambient temperature and then EtOAc (30 ml) was added. The phases were separated and the organic phase was washed with aq. NaOH (2 x 20 ml, 1.0 M) and brine (20 ml). The organic phase was dried over  $\text{MgSO}_4$ , filtered and evaporated *in vacuo*. The residue was purified by column chromatography on silica (hexanes/EtOAc 4:1) to afford the corresponding iodolactone **2** or **4**.

**Notice!** The iodolactones were observed to be very labile in the condensed state under vacuum. Thus, to avoid decomposition, great care had to be taken when evaporating the solvent *in vacuo* after isolation by flash chromatography. Once all visible traces of solvent had been removed it was of paramount importance to equilibrate back to ambient pressure immediately. Without this precaution, the isolated iodolactone would turn black spontaneously. Due to the instability of the iodolactones they were stored under argon and refrigerated.

### (*S*)-6-(Iodomethyl)-6-phenyltetrahydro-2*H*-pyran-2-one (**2a**).<sup>4</sup>

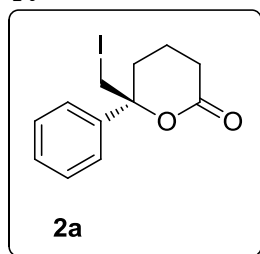

Prepared according to the general procedure using 5-phenylhex-5-enoic acid (**1a**) (40 mg, 210  $\mu\text{mol}$ ), squaramide **6b** (17 mg, 31  $\mu\text{mol}$ ), iodine (8 mg, 31  $\mu\text{mol}$ ) and *N*-iodosuccinimide (47 mg, 210  $\mu\text{mol}$ ). Purified by column chromatography on silica (hexanes/EtOAc 4:1). The enantiomeric excess was determined by chiral HPLC analysis (Chiralpak AD-H, hexanes/*i*-PrOH 98:2, 1 mL/min):  $t_r(e_1, \text{major}) = 24.04$  min and  $t_r(e_2, \text{minor}) = 27.20$  min. Yield: 55 mg (83%) of colourless oil; *ee*: 87%; TLC (hexanes/EtOAc 1:1):  $R_f = 0.48$ , visualized with anisaldehyde;  $[\alpha]_D^{20} = 27.2$  ( $c = 0.06$ ,  $\text{CHCl}_3$ );  $^1\text{H}$  NMR (400 MHz,  $\text{CDCl}_3$ )  $\delta$  7.30 – 7.54 (m, 5H), 3.57 (d,  $J = 1.4$  Hz, 2H), 2.28 – 2.59 (m, 4H), 1.69 – 1.98 (m, 1H), 1.45 – 1.69 (m, 1H);  $^{13}\text{C}$  NMR (101 MHz,  $\text{CDCl}_3$ )  $\delta$  170.4, 140.1, 128.9 (2C), 128.3, 125.1 (2C), 84.3, 32.0, 28.9, 17.7, 16.5; HRMS (EI): Exact mass calculated for  $\text{C}_{12}\text{H}_{13}\text{IO}_2$  [ $M$ ]<sup>+</sup>: 315.9960, found 315.9972.

### (*R*)-6-(Iodomethyl)-6-phenyltetrahydro-2*H*-pyran-2-one (*ent*-**2a**).<sup>4</sup>

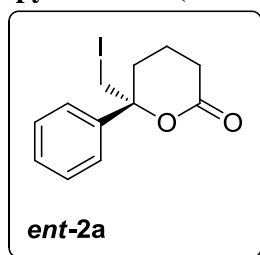

Prepared according to the general procedure using 5-phenylhex-5-enoic acid (**1a**) (40 mg, 210  $\mu\text{mol}$ ), squaramide *ent*-**6b** (17 mg, 31  $\mu\text{mol}$ ), iodine (8 mg, 31  $\mu\text{mol}$ ) and *N*-iodosuccinimide (47 mg, 210  $\mu\text{mol}$ ). Purified by column chromatography on silica (hexanes/EtOAc 4:1). The enantiomeric excess was determined by chiral HPLC analysis (Chiralpak AD-H, hexanes/*i*-PrOH 98:2, 1 mL/min):  $t_r(e_1, \text{minor}) = 27.00$  min and  $t_r(e_2, \text{major}) = 31.00$  min. Yield: 52 mg (79%) of colourless oil; *ee*: 82%; TLC (hexanes/EtOAc 1:1):  $R_f = 0.48$ , visualized with anisaldehyde;  $[\alpha]_D^{20} = -26.0$  ( $c = 0.07$ ,  $\text{CHCl}_3$ );  $^1\text{H}$  NMR (400 MHz,  $\text{CDCl}_3$ )  $\delta$  7.30 – 7.54 (m, 5H), 3.57 (d,  $J = 1.4$  Hz, 2H), 2.28 – 2.59 (m, 4H), 1.69 – 1.98 (m, 1H), 1.45 – 1.69 (m, 1H);  $^{13}\text{C}$  NMR (101 MHz,  $\text{CDCl}_3$ )  $\delta$  170.4, 140.1, 128.9 (2C), 128.3, 125.1 (2C), 84.3, 32.0, 28.9, 17.7, 16.5.

**(S)-6-(Iodomethyl)-6-(naphthalen-2-yl)tetrahydro-2H-pyran-2-one (2b).**<sup>4</sup>

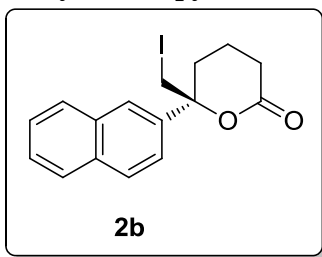

Prepared according to the general procedure using 5-(naphthalen-2-yl)hex-5-enoic acid (**1b**) (40 mg, 166  $\mu$ mol), squaramide **6b** (14 mg, 25  $\mu$ mol), iodine (7 mg, 25  $\mu$ mol) and *N*-iodosuccinimide (37 mg, 166  $\mu$ mol). Purified by column chromatography on silica (hexanes/EtOAc 4:1). The enantiomeric excess was determined by chiral HPLC analysis (Chiralpak AD-H, hexanes/*i*PrOH 99:1, 1 mL/min):  $t_r(e_1, \text{major}) = 66.14$  min and  $t_r(e_2, \text{minor}) = 82.74$  min. Yield: 55 mg (91%) of colourless oil; *ee*: 92%; TLC (hexanes/EtOAc 1:1):  $R_f = 0.56$ , visualized with anisaldehyde;  $[\alpha]_D^{20} = 22.0$  ( $c = 0.13$ ,  $\text{CHCl}_3$ );  $^1\text{H}$  NMR (400 MHz,  $\text{CDCl}_3$ )  $\delta$  7.81 – 7.97 (m, 4H), 7.48 – 7.62 (m, 2H), 7.41 (dd,  $J = 8.6, 2.0$  Hz, 1H), 3.67 (d,  $J = 2.8$  Hz, 2H), 2.29 – 2.77 (m, 4H), 1.78 – 1.93 (m, 1H), 1.52 – 1.69 (m, 1H);  $^{13}\text{C}$  NMR (101 MHz,  $\text{CDCl}_3$ )  $\delta$  170.5, 137.4, 133.0, 132.8, 129.0, 128.3, 127.5, 126.8 (2C), 125.0, 122.3, 84.6, 32.1, 29.0, 17.4, 16.6; HRMS (EI): Exact mass calculated for  $\text{C}_{16}\text{H}_{15}\text{IO}_2$   $[M]^+$ : 366.0117, found 366.0109.

**(S)-6-(Iodomethyl)-6-(*p*-tolyl)tetrahydro-2H-pyran-2-one (2c).**<sup>4</sup>

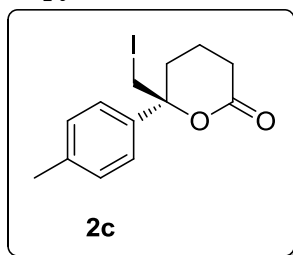

Prepared according to the general procedure using 5-(*p*-tolyl)hex-5-enoic acid (**1c**) (40 mg, 196  $\mu$ mol), squaramide **6b** (17 mg, 29  $\mu$ mol), iodine (7 mg, 29  $\mu$ mol) and *N*-iodosuccinimide (44 mg, 196  $\mu$ mol). Purified by column chromatography on silica (hexanes/EtOAc 4:1). The enantiomeric excess was determined by chiral HPLC analysis (Chiralpak AD-H, hexanes/*i*PrOH 98:2, 1 mL/min):  $t_r(e_1, \text{major}) = 25.32$  min and  $t_r(e_2, \text{minor}) = 34.16$  min. Yield: 51 mg (80%) of colourless oil; *ee*: 86%; TLC (hexanes/EtOAc 1:1):  $R_f = 0.56$ , visualized with anisaldehyde;  $[\alpha]_D^{20} = 24.6$  ( $c = 0.10$ ,  $\text{CHCl}_3$ );  $^1\text{H}$  NMR (400 MHz,  $\text{CDCl}_3$ )  $\delta$  7.25 (d,  $J = 8.4$  Hz, 2H), 7.20 (d,  $J = 8.2$  Hz, 2H), 3.55 (s, 2H), 2.40 – 2.54 (m, 2H), 2.35 (s, 3H), 2.27 – 2.40 (m, 2H), 1.74 – 1.89 (m, 1H), 1.66 – 1.49 (m, 1H);  $^{13}\text{C}$  NMR (101 MHz,  $\text{CDCl}_3$ )  $\delta$  170.5, 138.2, 137.1, 129.6 (2C), 125.1 (2C), 84.3, 31.9, 28.9, 21.0, 17.9, 16.5; HRMS (EI): Exact mass calculated for  $\text{C}_{13}\text{H}_{15}\text{IO}_2$   $[M]^+$ : 330.0117, found 330.0108.

**(S)-6-(Iodomethyl)-6-(4-methoxyphenyl)tetrahydro-2H-pyran-2-one (2d).**<sup>4</sup>

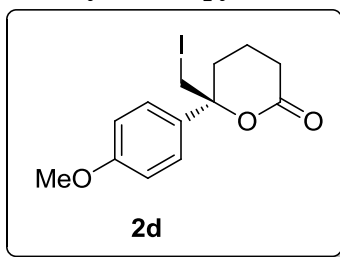

Prepared according to the general procedure using 5-(4-methoxyphenyl)hex-5-enoic acid (**1d**) (48 mg, 218  $\mu$ mol), squaramide **6b** (18 mg, 33  $\mu$ mol), iodine (8 mg, 33  $\mu$ mol) and *N*-iodosuccinimide (49 mg, 218  $\mu$ mol). Purified by column chromatography on silica (hexanes/EtOAc 4:1). The enantiomeric excess was determined by chiral HPLC analysis (Chiralpak AD-H, hexanes/*i*PrOH 90:10, 1 mL/min):  $t_r(e_1, \text{major}) = 12.91$  min and  $t_r(e_2, \text{minor}) = 15.56$  min. Yield: 65 mg (87%) of colourless oil; *ee*: 12%; TLC (hexanes/EtOAc 1:1):  $R_f = 0.53$ , visualized with anisaldehyde;  $[\alpha]_D^{20} = 1.6$  ( $c = 0.06$ ,  $\text{CHCl}_3$ );  $^1\text{H}$  NMR (300 MHz,  $\text{CDCl}_3$ )  $\delta$  7.24 – 7.33 (m, 2H), 6.86 – 6.95 (m, 2H), 3.81 (s, 3H), 3.50 – 3.58 (m, 2H), 2.39 – 2.55 (m, 2H), 2.25 – 2.39 (m, 2H), 1.75 – 1.90 (m, 1H), 1.48 – 1.70

(m, 1H);  $^{13}\text{C}$  NMR (75 MHz,  $\text{CDCl}_3$ )  $\delta$  170.5, 159.4, 132.0, 126.5 (2C), 114.2 (2C), 84.2, 55.3, 31.8, 28.9, 18.1, 16.5; HRMS (EI): Exact mass calculated for  $\text{C}_{13}\text{H}_{15}\text{IO}_3$   $[M]^+$ : 346.0066, found 346.0064.

**(S)-6-(4-Fluorophenyl)-6-(iodomethyl)tetrahydro-2H-pyran-2-one (2e).**<sup>4</sup>

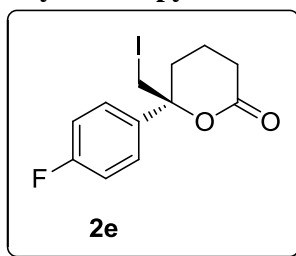

Prepared according to the general procedure using 5-(4-fluorophenyl)hex-5-enoic acid (**1e**) (42 mg, 200  $\mu\text{mol}$ ), squaramide **6b** (17 mg, 30  $\mu\text{mol}$ ), iodine (8 mg, 30  $\mu\text{mol}$ ) and *N*-iodosuccinimide (45 mg, 200  $\mu\text{mol}$ ). Purified by column chromatography on silica (hexanes/EtOAc 4:1). The enantiomeric excess was determined by chiral HPLC analysis (Chiralpak AD-H, hexanes/*i*-PrOH 90:10, 1 mL/min):  $t_r(e_1, \text{major}) = 10.70$  min and  $t_r(e_2, \text{minor}) = 12.17$  min. Yield: 55 mg (83%) of colourless oil; *ee*: 90%; TLC (hexanes/EtOAc 1:1):  $R_f = 0.49$ , visualized with anisaldehyde;  $[\alpha]_D^{20} = 26.0$  ( $c = 0.10$ ,  $\text{CHCl}_3$ );  $^1\text{H}$  NMR (300 MHz,  $\text{CDCl}_3$ )  $\delta$  7.29 – 7.47 (m, 2H), 7.02 – 7.17 (m, 2H), 3.54 (s, 1H), 2.41 – 2.58 (m, 2H), 2.41 – 2.26 (m, 2H), 1.76 – 1.93 (m, 1H), 1.48 – 1.71 (m, 1H);  $^{13}\text{C}$  NMR (101 MHz,  $\text{CDCl}_3$ )  $\delta$  170.1, 162.4 (d,  $^1J_{\text{CF}} = 248$  Hz), 136.0 (d,  $^4J_{\text{CF}} = 3.2$  Hz), 127.1 (d,  $^3J_{\text{CF}} = 8.3$  Hz, 2C), 115.9 (d,  $^2J_{\text{CF}} = 21.5$  Hz, 2C), 84.1, 31.9, 28.9, 17.5, 16.5; HRMS (EI): Exact mass calculated for  $\text{C}_{12}\text{H}_{12}\text{FIO}_2$   $[M]^+$ : 333.9866, found 333.9867.

**(S)-6-(4-Chlorophenyl)-6-(iodomethyl)tetrahydro-2H-pyran-2-one (2f).**<sup>4</sup>

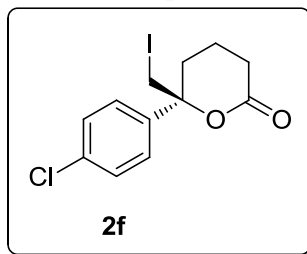

Prepared according to the general procedure using 5-(4-chlorophenyl)hex-5-enoic acid (**1f**) (40 mg, 178  $\mu\text{mol}$ ), squaramide **6b** (15 mg, 27  $\mu\text{mol}$ ), iodine (7 mg, 27  $\mu\text{mol}$ ) and *N*-iodosuccinimide (40 mg, 178  $\mu\text{mol}$ ). Purified by column chromatography on silica (hexanes/EtOAc 4:1). The enantiomeric excess was determined by chiral HPLC analysis (Chiralpak AD-H, hexanes/*i*-PrOH 98:2, 1 mL/min):  $t_r(e_1, \text{major}) = 31.58$  min and  $t_r(e_2, \text{minor}) = 46.09$  min. Yield: 49 mg (78%) of colourless oil; *ee*: 96%; TLC (hexanes/EtOAc 1:1):  $R_f = 0.46$ , visualized with anisaldehyde;  $[\alpha]_D^{20} = 27.2$  ( $c = 0.20$ ,  $\text{CHCl}_3$ );  $^1\text{H}$  NMR (400 MHz,  $\text{CDCl}_3$ )  $\delta$  7.38 (d,  $J = 8.8$  Hz, 2H), 7.32 (d,  $J = 8.8$  Hz, 2H), 2.42 – 2.59 (m, 2H), 2.27 – 2.41 (m, 2H), 1.78 – 1.93 (m, 1H), 1.50 – 1.66 (m, 1H);  $^{13}\text{C}$  NMR (101 MHz,  $\text{CDCl}_3$ )  $\delta$  170.0, 138.8, 134.5, 129.1 (2C), 126.7 (2C), 84.1, 32.0, 29.0, 17.1, 16.5; HRMS (EI): Exact mass calculated for  $\text{C}_{12}\text{H}_{12}\text{ClIO}_2$   $[M]^+$ : 349.9571, found 349.9577.

**(S)-6-(4-Bromophenyl)-6-(iodomethyl)tetrahydro-2H-pyran-2-one (2g).**<sup>4</sup>

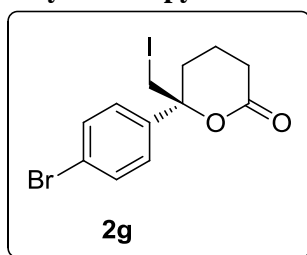

Prepared according to the general procedure using 5-(4-bromophenyl)hex-5-enoic acid (**1g**) (22 mg, 80  $\mu\text{mol}$ ), squaramide **6b** (7 mg, 12  $\mu\text{mol}$ ), iodine (3 mg, 27  $\mu\text{mol}$ ) and *N*-iodosuccinimide (18 mg, 178  $\mu\text{mol}$ ). Purified by column chromatography on silica (hexanes/EtOAc 4:1). The enantiomeric excess was determined by chiral HPLC analysis (Chiralpak AD-H, hexanes/*i*-PrOH 90:10, 1 mL/min):  $t_r(e_1, \text{major}) = 11.83$  min and  $t_r(e_2, \text{minor}) = 15.15$  min.



min. Yield: 23 mg (73%) of colourless oil; *ee*: 91%; TLC (hexanes/EtOAc 1:1):  $R_f$  = 0.50, visualized with anisaldehyde;  $[\alpha]_D^{20}$  = 23.3 ( $c$  = 0.15,  $\text{CHCl}_3$ );  $^1\text{H}$  NMR (400 MHz,  $\text{CDCl}_3$ )  $\delta$  7.54 (d,  $J$  = 8.6 Hz, 2H), 7.26 (d,  $J$  = 8.7 Hz, 2H), 3.54 (s, 2H), 2.42 – 2.57 (m, 2H), 2.28 – 2.42 (m, 2H), 1.78 – 1.92 (m, 1H), 1.50 – 1.70 (m, 1H);  $^{13}\text{C}$  NMR (101 MHz,  $\text{CDCl}_3$ )  $\delta$  170.0, 139.4, 132.1 (2C), 127.0 (2C), 122.6, 84.1, 31.9, 29.0, 16.9, 16.5; HRMS (EI): Exact mass calculated for  $\text{C}_{12}\text{H}_{12}\text{BrIO}_2$   $[M]^+$ : 393.9065, found 393.9070.

**(S)-6-(Iodomethyl)-6-isopropyltetrahydro-2H-pyran-2-one (2h).**<sup>4</sup>

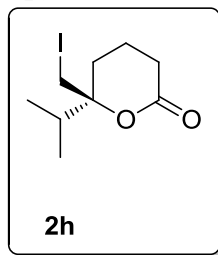

Prepared according to the general procedure using 6-methyl-5-methyleneheptanoic acid (**1h**) (29 mg, 186  $\mu\text{mol}$ ), squaramide **6b** (16 mg, 28  $\mu\text{mol}$ ), iodine (7 mg, 28  $\mu\text{mol}$ ) and *N*-iodosuccinimide (42 mg, 186  $\mu\text{mol}$ ). Purified by column chromatography on silica (hexanes/EtOAc 4:1). The enantiomeric excess was determined by chiral GLC analysis (Chiraldex G-TA, 170 °C isothermal):  $t_r(e_1, \text{major})$  = 22.56 min and  $t_r(e_2, \text{minor})$  = 22.91 min. Yield: 40 mg (77%) of colourless oil; *ee*: 16%; TLC (hexanes/EtOAc 1:1):  $R_f$  = 0.57, visualized with anisaldehyde;  $[\alpha]_D^{20}$  = 1.50 ( $c$  = 0.07,  $\text{CHCl}_3$ );  $^1\text{H}$  NMR (400 MHz,  $\text{CDCl}_3$ )  $\delta$  3.42 (s, 2H), 2.45 – 2.59 (m, 1H), 2.31 – 2.45 (m, 1H), 2.09 – 2.25 (m, 1H), 1.95 – 2.06 (m, 1H), 1.76 – 1.95 (m, 3H), 0.97 (d,  $J$  = 7.0 Hz, 6H);  $^{13}\text{C}$  NMR (101 MHz,  $\text{CDCl}_3$ )  $\delta$  170.4, 84.8, 35.2, 29.5, 26.7, 16.7, 16.6, 16.4, 13.0; HRMS (EI): Exact mass calculated for  $\text{C}_9\text{H}_{15}\text{IO}_2$   $[M]^+$ : 282.0119, found 282.0124.

**(R)-5-(Iodomethyl)-5-phenyldihydrofuran-2(3H)-one (4a).**<sup>4, 6</sup>

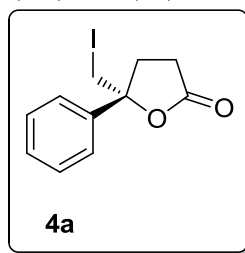

Prepared according to the general procedure using 4-phenylpent-4-enoic acid (**3a**) (40 mg, 227  $\mu\text{mol}$ ), squaramide **6b** (19 mg, 34  $\mu\text{mol}$ ), iodine (9 mg, 34  $\mu\text{mol}$ ) and *N*-iodosuccinimide (51 mg, 227  $\mu\text{mol}$ ). Purified by column chromatography on silica (hexanes/EtOAc 4:1). The enantiomeric excess was determined by chiral HPLC analysis (Chiralpak AD-H, hexanes/*i*-PrOH 98:2, 1 mL/min):  $t_r(e_1, \text{minor})$  = 20.69 min and  $t_r(e_2, \text{major})$  = 23.69 min. Yield: 59 mg (86%) of colourless oil; *ee*: 7%; TLC (hexanes/EtOAc 1:1):  $R_f$  = 0.55, visualized with anisaldehyde;  $[\alpha]_D^{20}$  = 5.70 ( $c$  = 0.02,  $\text{CHCl}_3$ );  $^1\text{H}$  NMR (300 MHz,  $\text{CDCl}_3$ )  $\delta$  7.31 – 7.49 (m, 5H), 3.64 (d,  $J$  = 0.9 Hz, 2H), 2.41 – 2.88 (m, 4H);  $^{13}\text{C}$  NMR (101 MHz,  $\text{CDCl}_3$ )  $\delta$  175.3, 140.5, 128.8 (2C), 128.5, 124.8 (2C), 86.0, 33.9, 29.2, 16.3; HRMS (EI): Exact mass calculated for  $\text{C}_{11}\text{H}_{11}\text{IO}_2$   $[M]^+$ : 301.9804, found 301.9793.

**(S)-5-(4-Chlorophenyl)-5-(iodomethyl)dihydrofuran-2(3H)-one (4b).**<sup>7</sup>

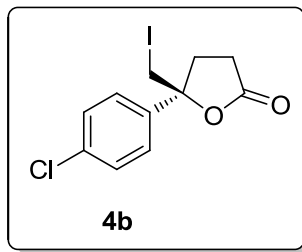

Prepared according to the general procedure using 4-(4-chlorophenyl)pent-4-enoic acid (**3b**) (42 mg, 200  $\mu\text{mol}$ ), squaramide **6b** (17 mg, 30  $\mu\text{mol}$ ), iodine (8 mg, 30  $\mu\text{mol}$ ) and *N*-iodosuccinimide (45 mg, 200  $\mu\text{mol}$ ). Purified by column chromatography on silica (hexanes/EtOAc 4:1). The enantiomeric excess was determined by chiral HPLC

analysis (Chiralpak AD-H, hexanes/*i*PrOH 98:2, 1 mL/min):  $t_r(e_1, \text{major}) = 25.97$  min and  $t_r(e_2, \text{minor}) = 27.98$  min. Yield: 57 mg (85%) of colourless oil; *ee*: 14%; TLC (hexanes/EtOAc 1:1):  $R_f = 0.52$ , visualized with anisaldehyde;  $[\alpha]_D = 0.0$  ( $c = 0.21$ ,  $\text{CHCl}_3$ );  $^1\text{H}$  NMR (300 MHz,  $\text{CDCl}_3$ )  $\delta$  7.30 – 7.43 (m, 4H), 3.59 (s, 2H), 2.65 – 2.88 (m, 2H), 2.43 – 2.65 (m, 2H);  $^{13}\text{C}$  NMR (101 MHz,  $\text{CDCl}_3$ )  $\delta$  174.9, 139.1, 134.6, 129.0 (2C), 126.3 (2C), 85.6, 33.8, 29.1, 15.7; HRMS (EI): Exact mass calculated for  $\text{C}_{11}\text{H}_{10}\text{ClIO}_2$   $[M]^+$ : 335.9414, found 335.9407.

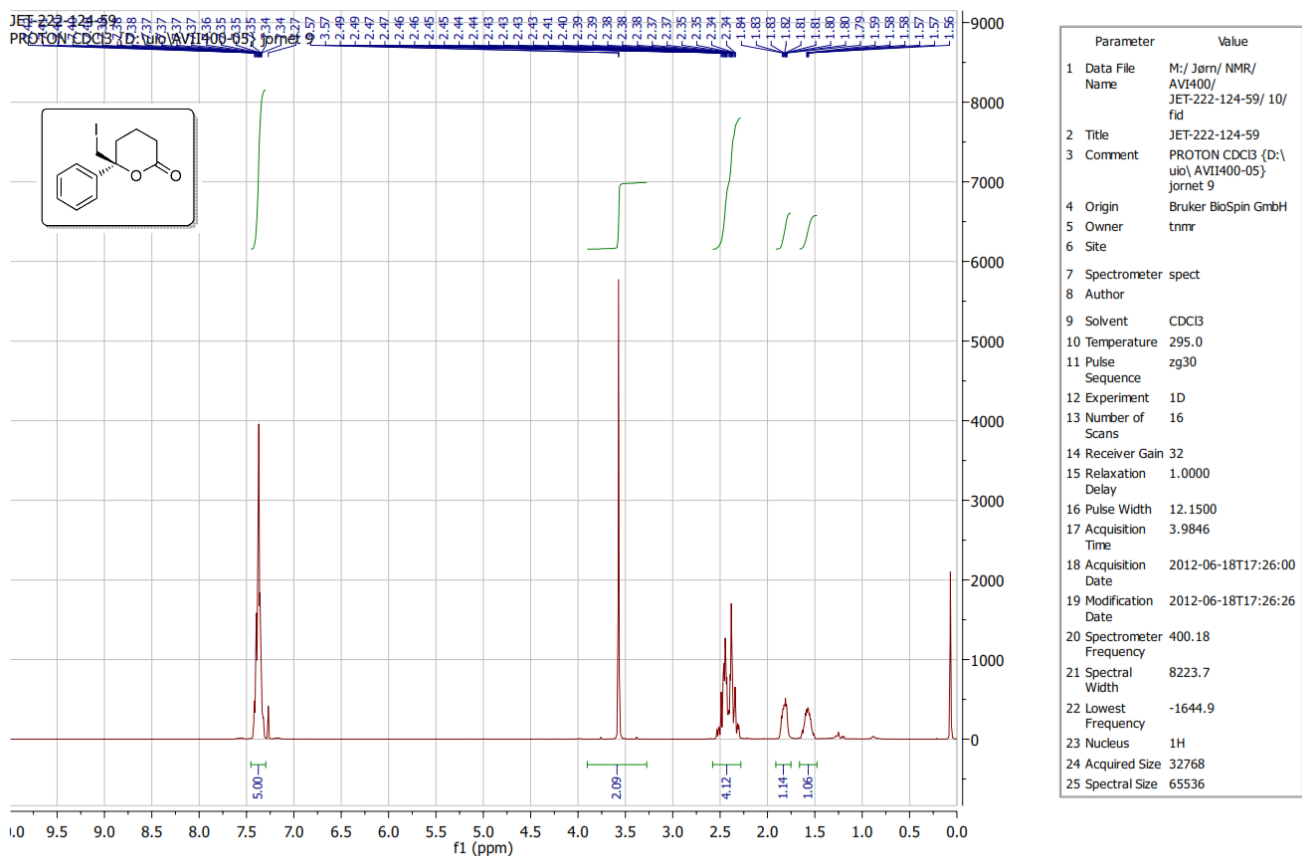

Figure S-37  $^1\text{H}$ -NMR spectrum of compound 2a.

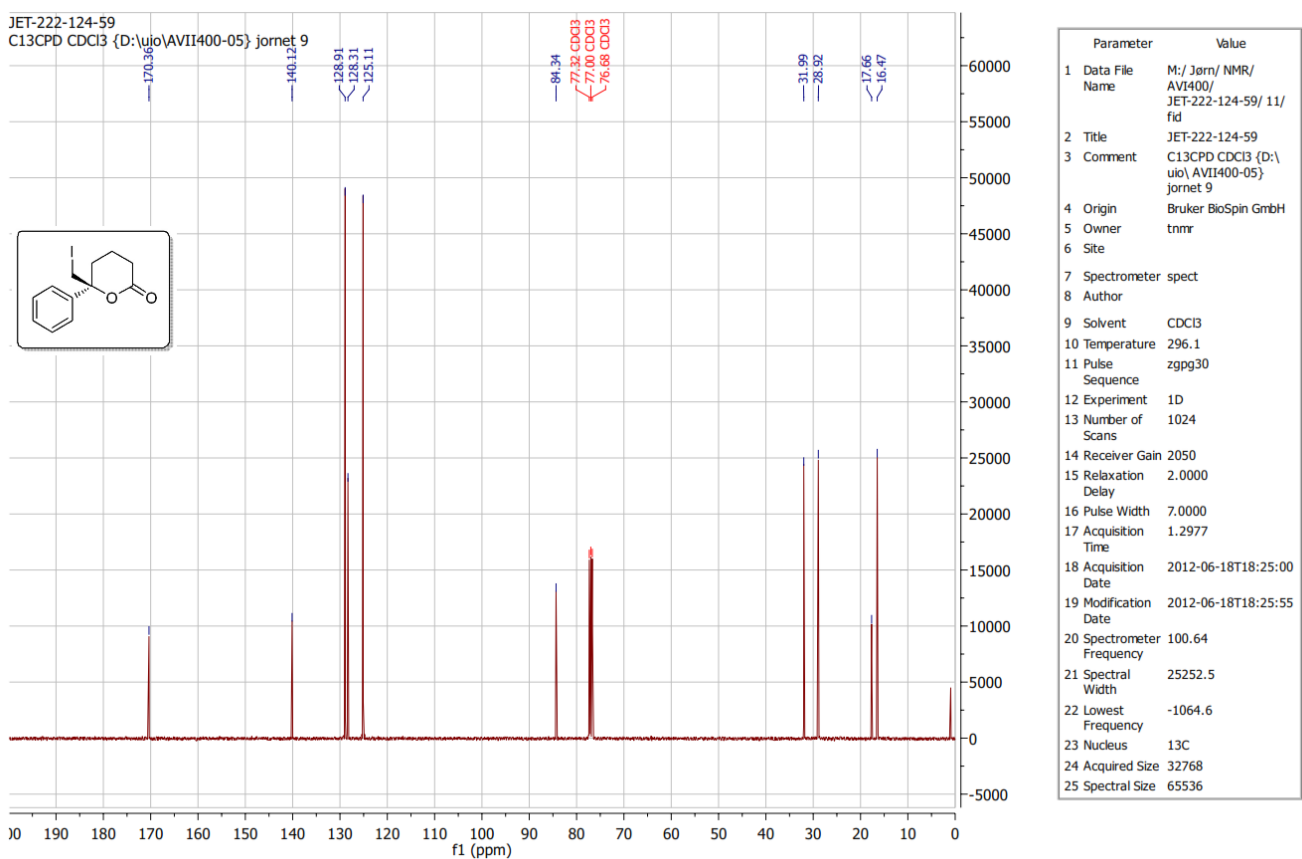

Figure S-38  $^{13}\text{C}$ -NMR spectrum of compound 2a.

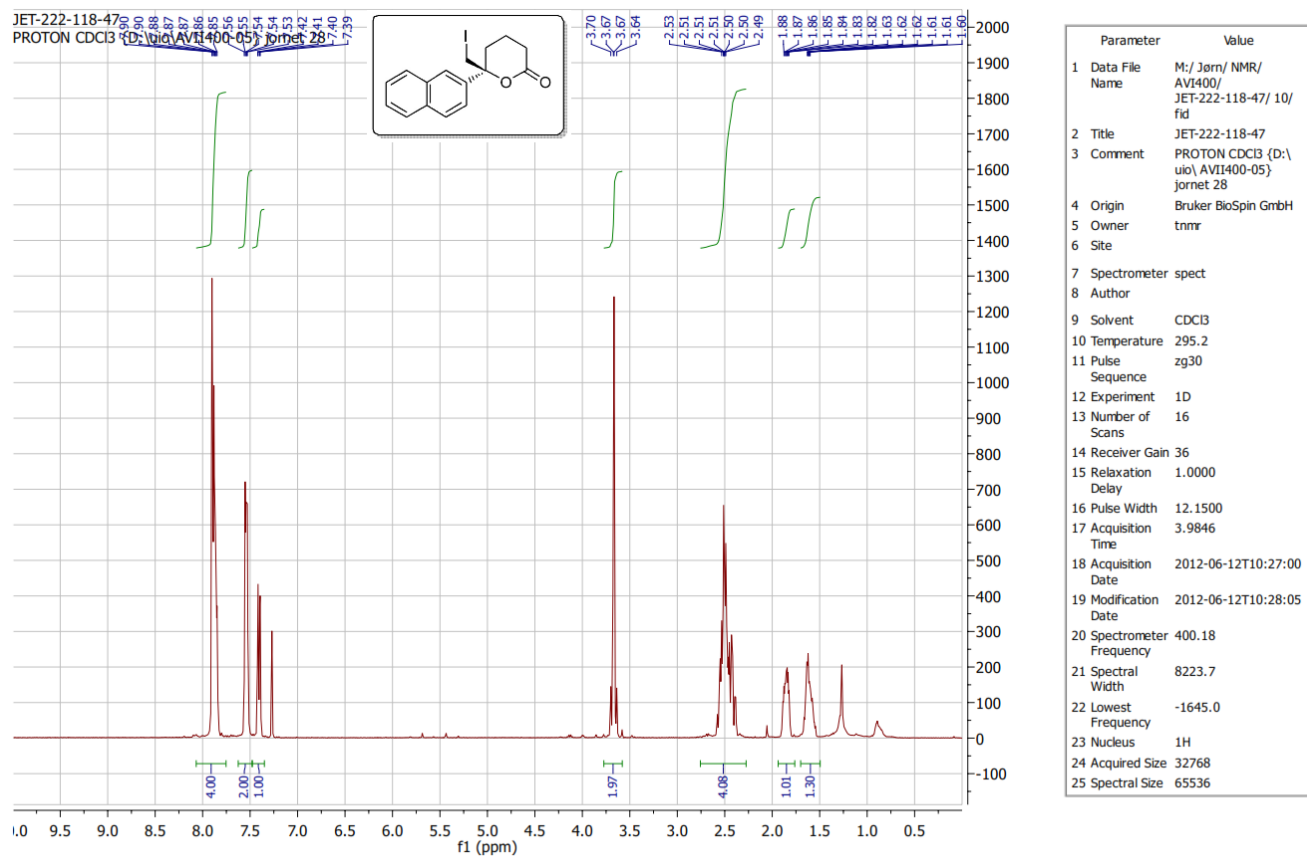

Figure S-39 <sup>1</sup>H-NMR spectrum of compound 2b.

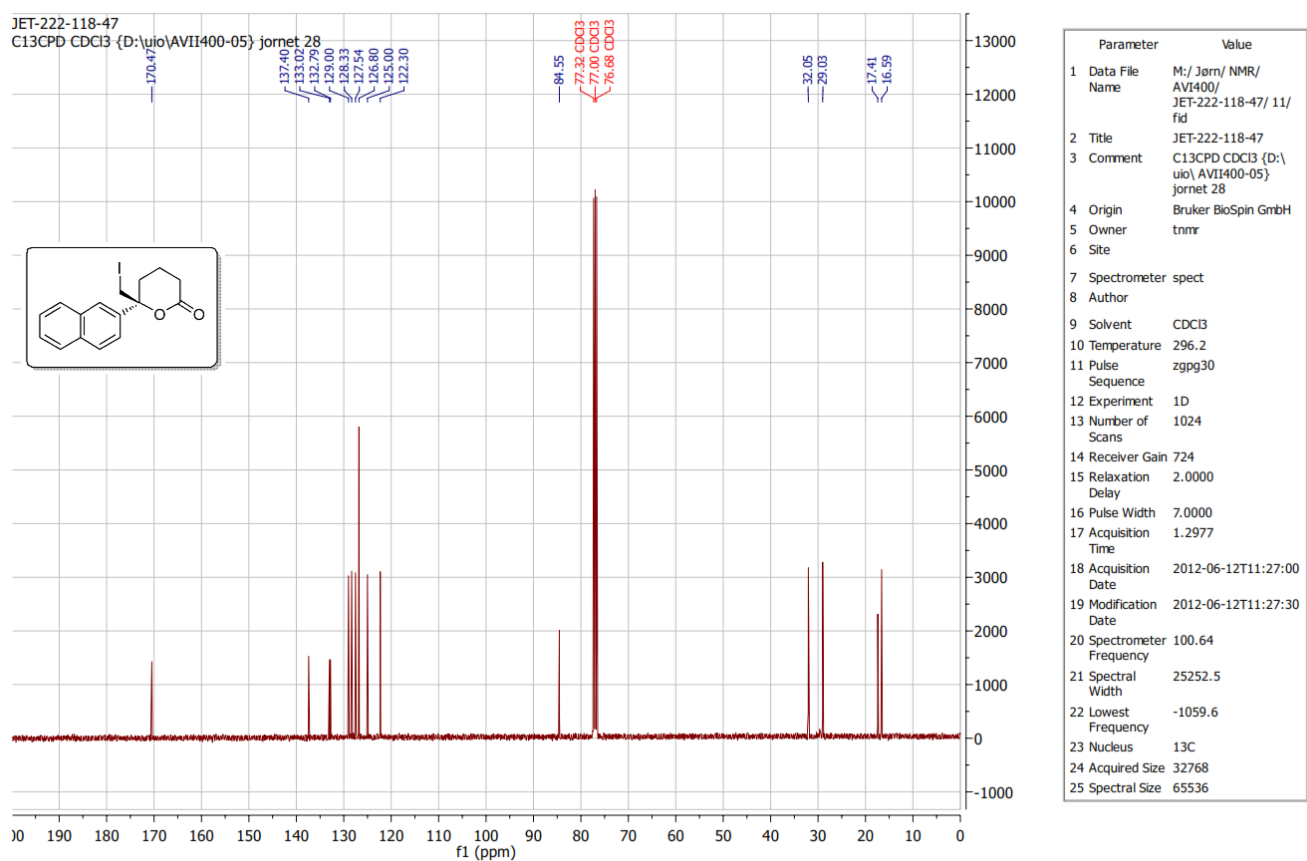

Figure S-40 <sup>13</sup>C-NMR spectrum of compound 2b.

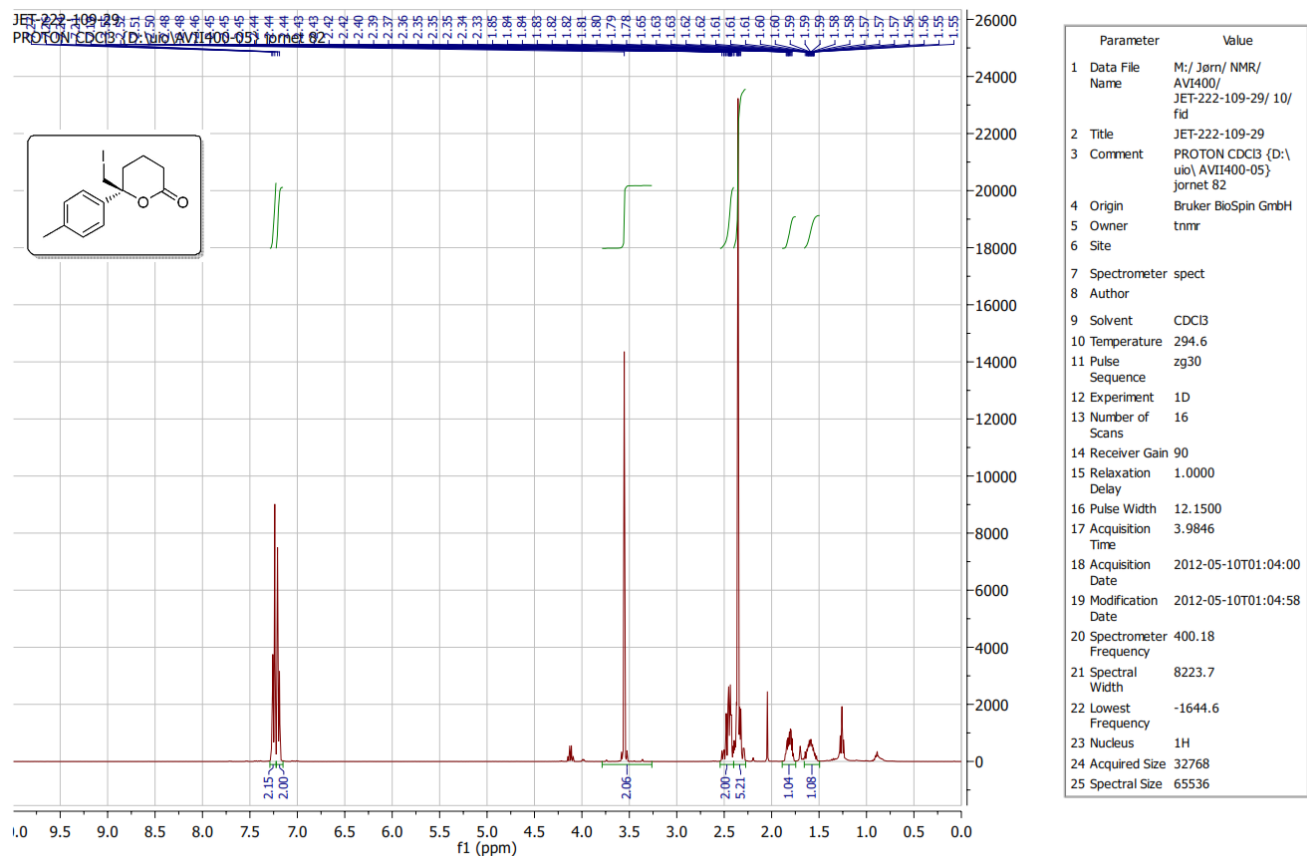

Figure S-41  $^1\text{H}$ -NMR spectrum of compound 2c.

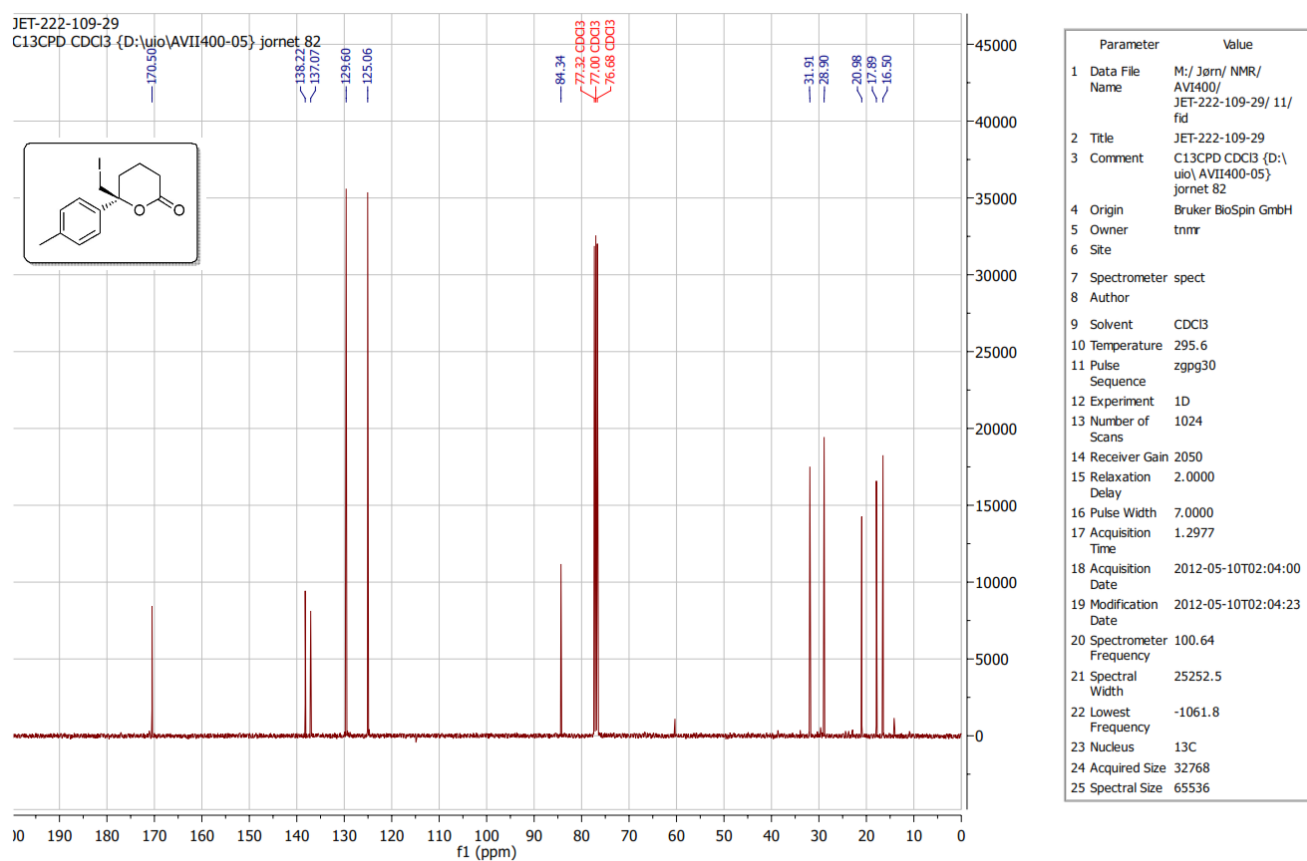

Figure S-42  $^{13}\text{C}$ -NMR spectrum of compound 2c.

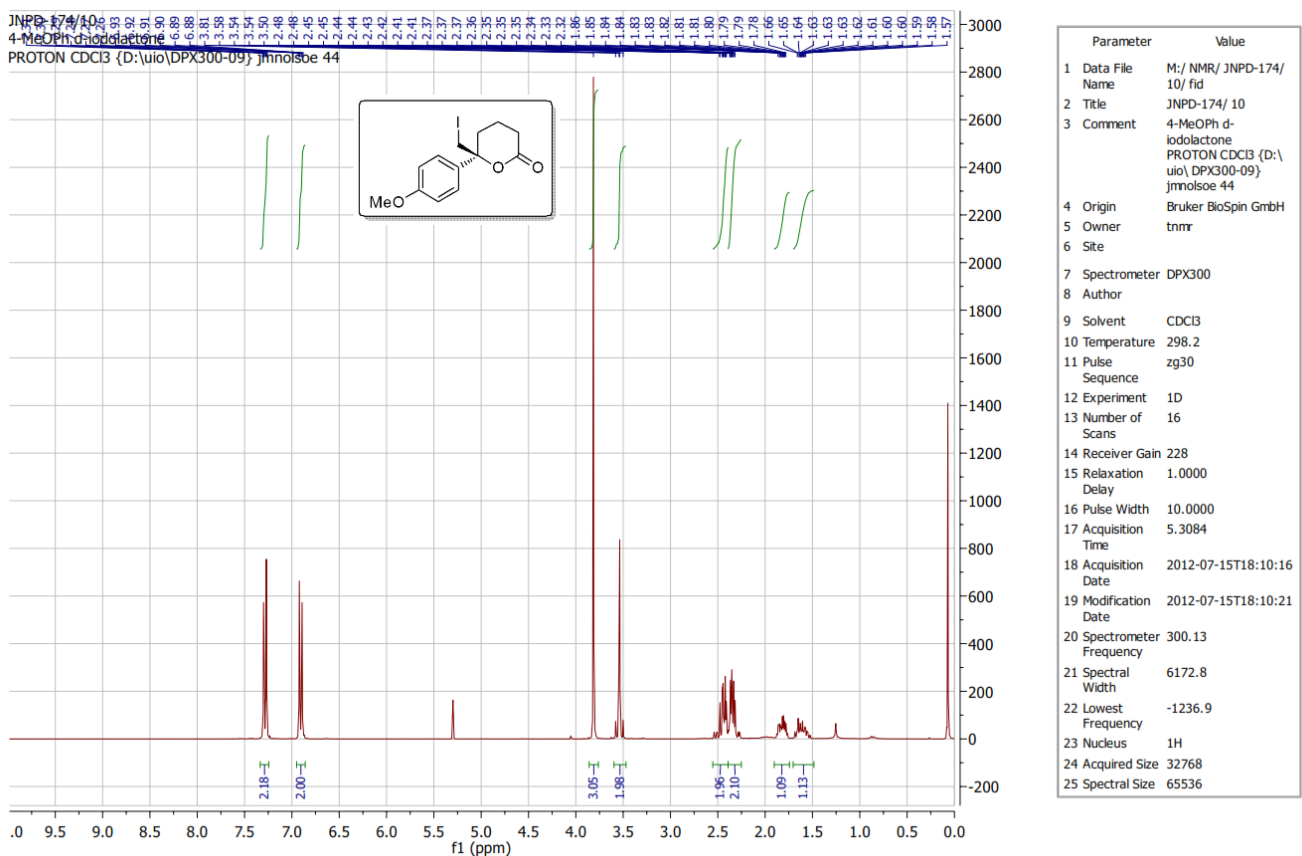

Figure S-43  $^1\text{H}$ -NMR spectrum of compound **2d**.

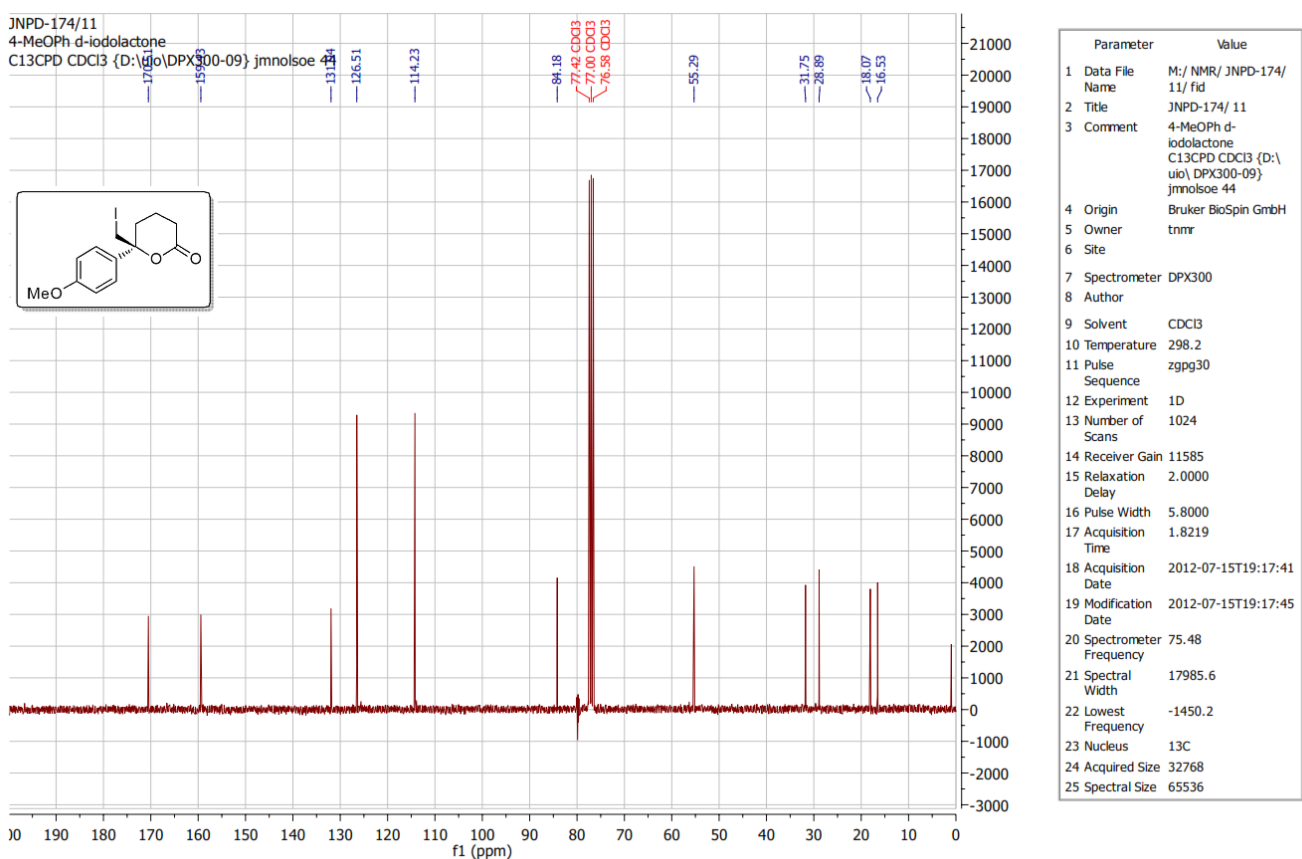

Figure S-44  $^{13}\text{C}$ -NMR spectrum of compound **2d**.

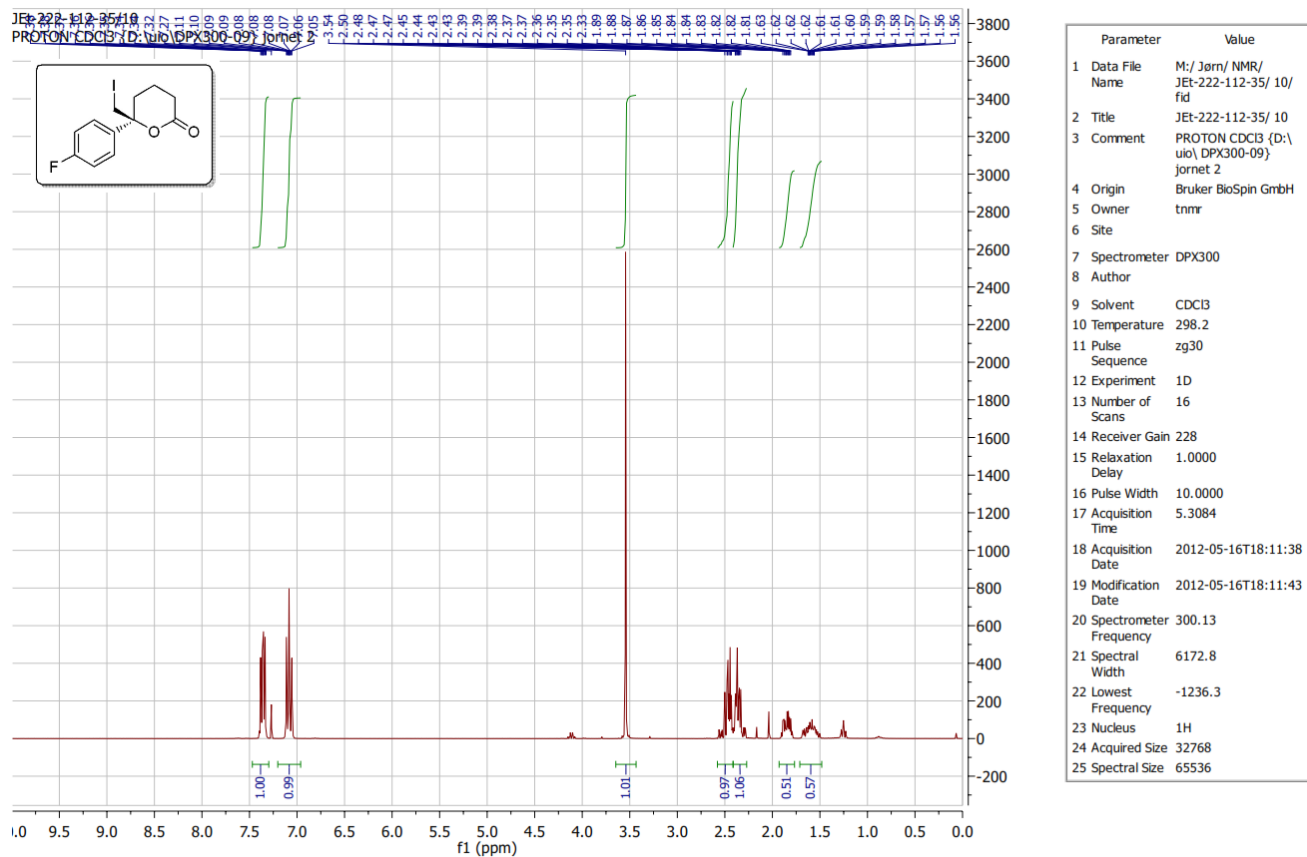

Figure S-45  $^1\text{H}$ -NMR spectrum of compound 2e.

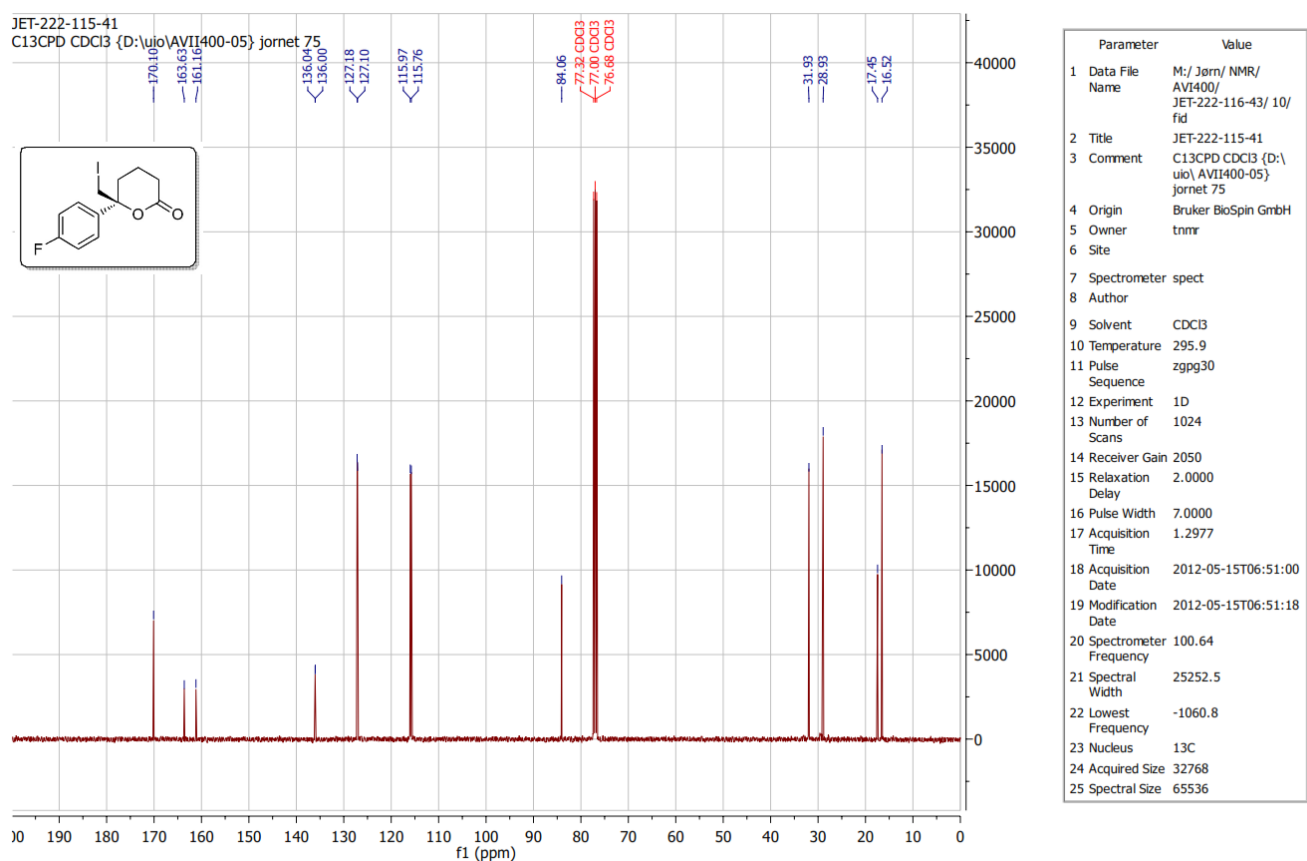

Figure S-46  $^{13}\text{C}$ -NMR spectrum of compound 2e.

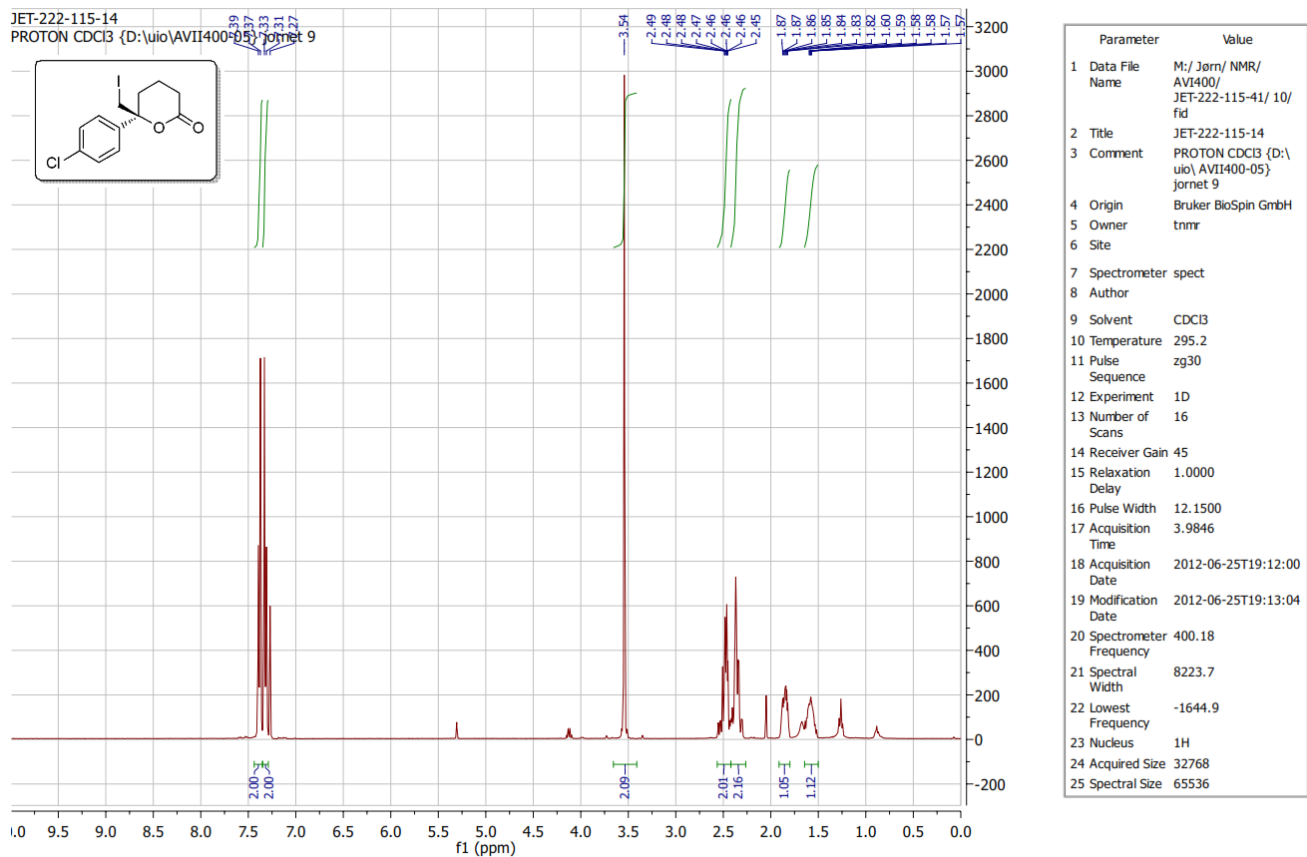

Figure S-47  $^1\text{H}$ -NMR spectrum of compound 2f.

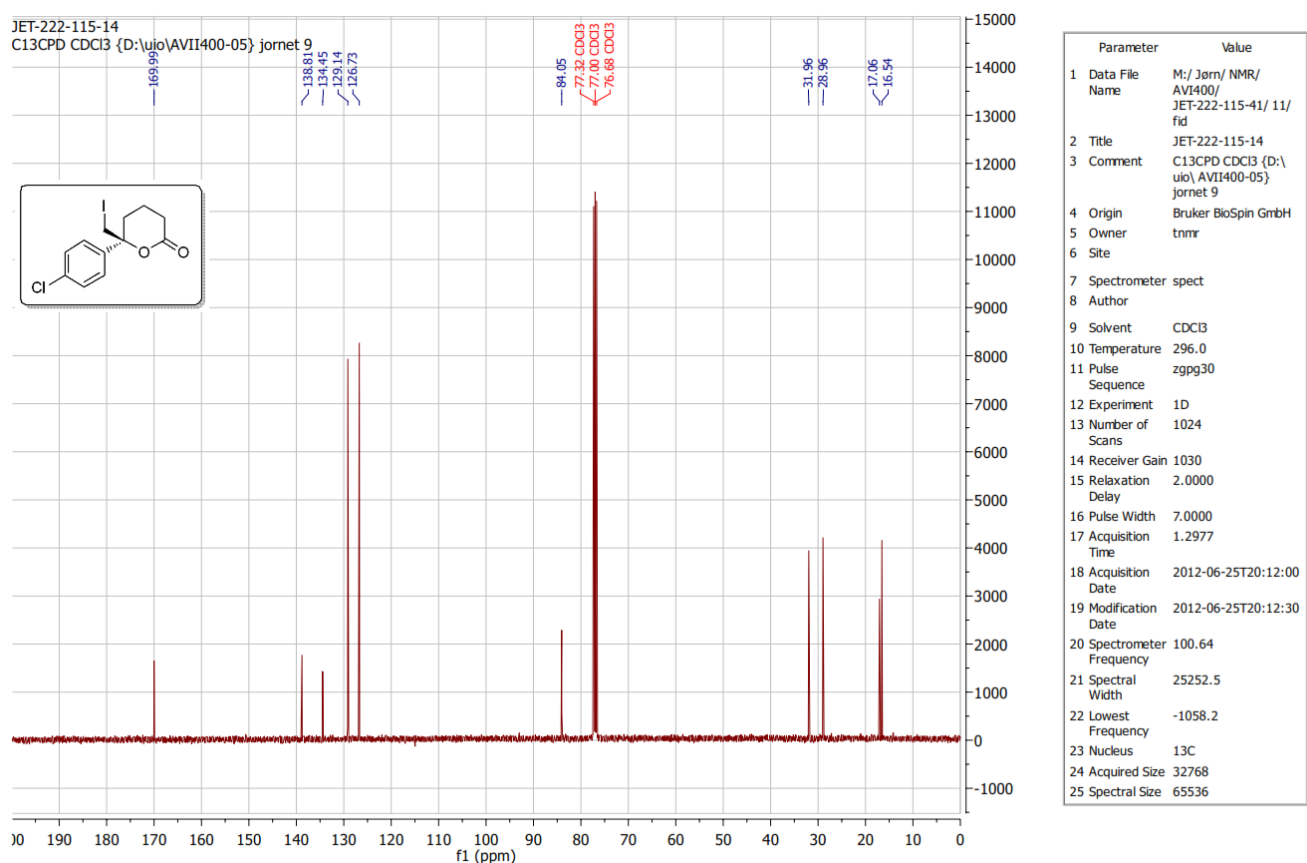

Figure S-48  $^{13}\text{C}$ -NMR spectrum of compound 2f.



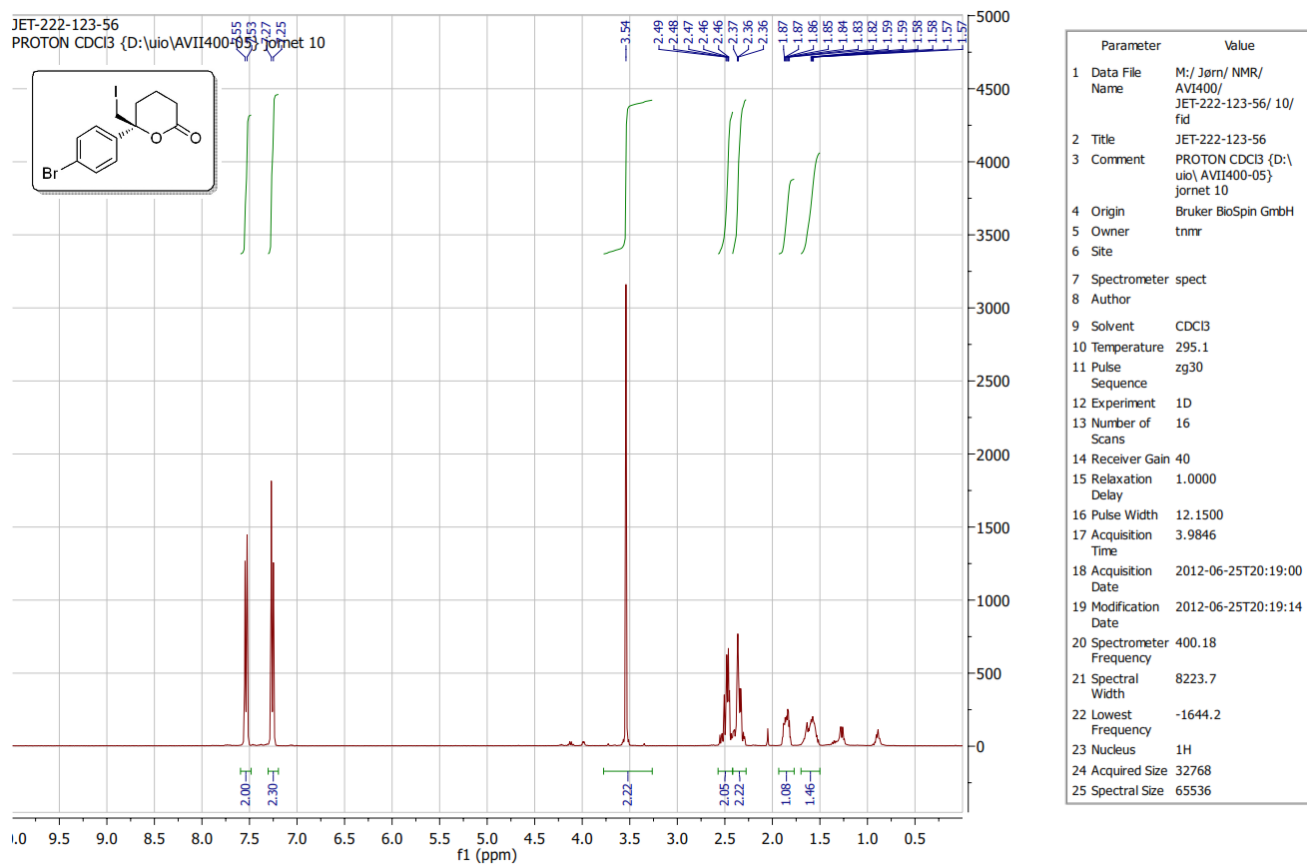

Figure S-49 <sup>1</sup>H-NMR spectrum of compound 2g.

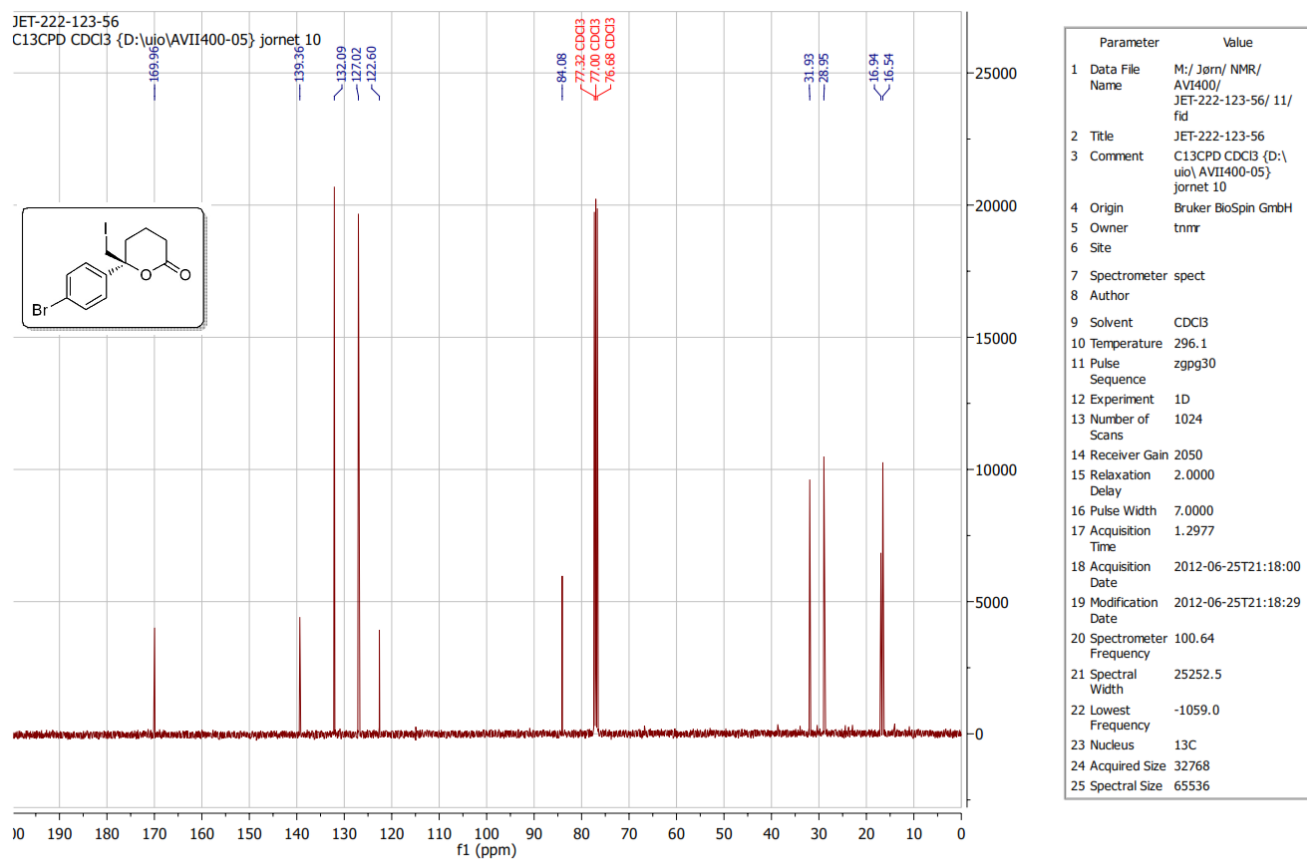

Figure S-50 <sup>13</sup>C-NMR spectrum of compound 2g.

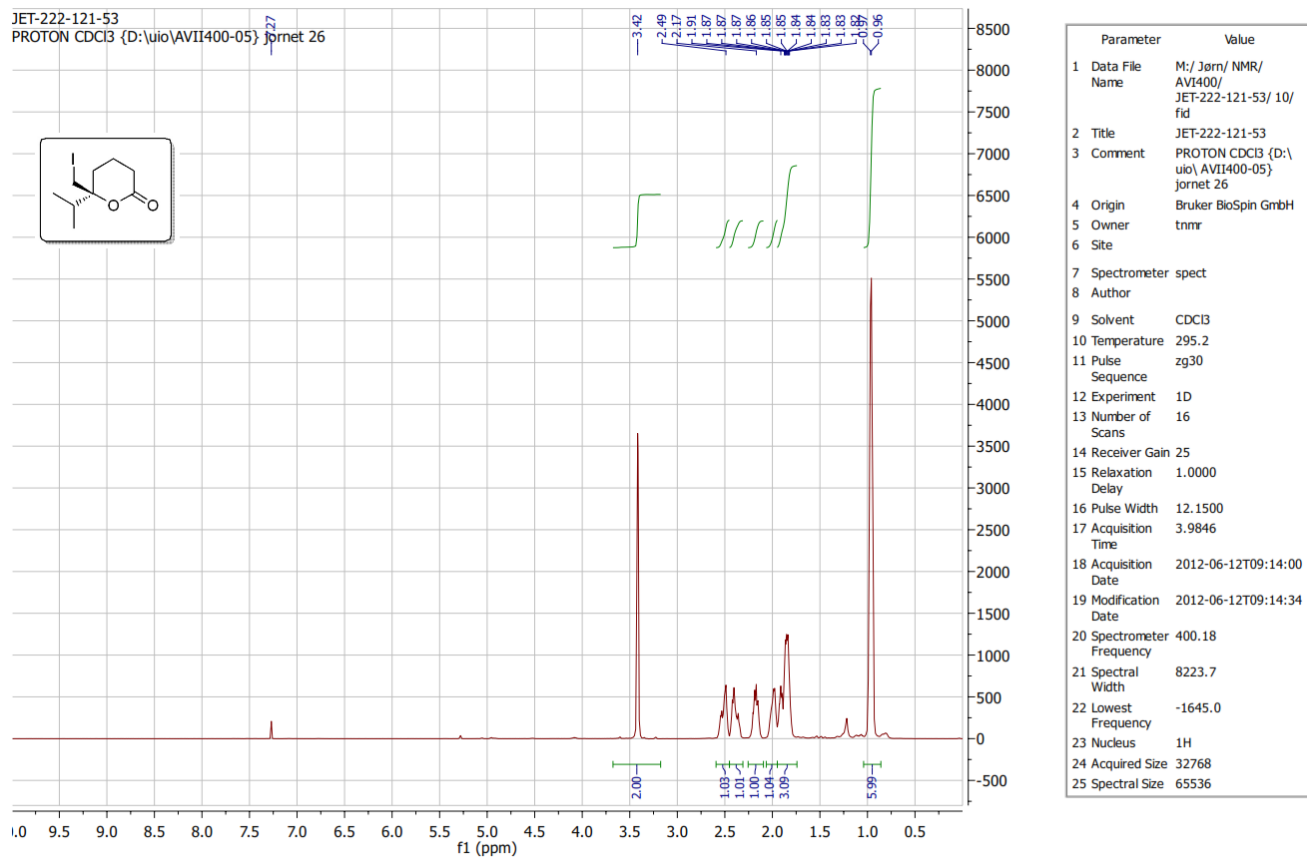

Figure S-51  $^1\text{H}$ -NMR spectrum of compound 2h.

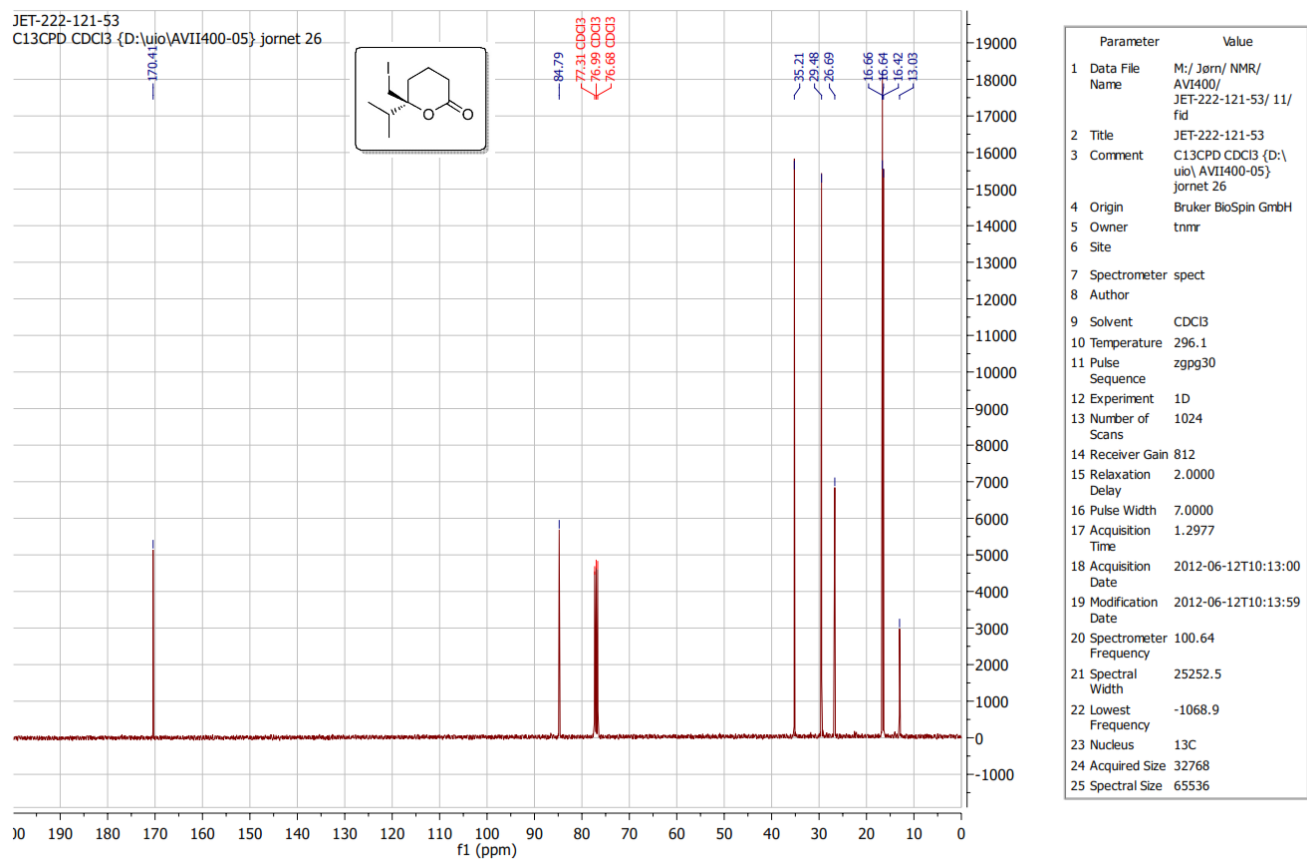

Figure S-52  $^{13}\text{C}$ -NMR spectrum of compound 2h.

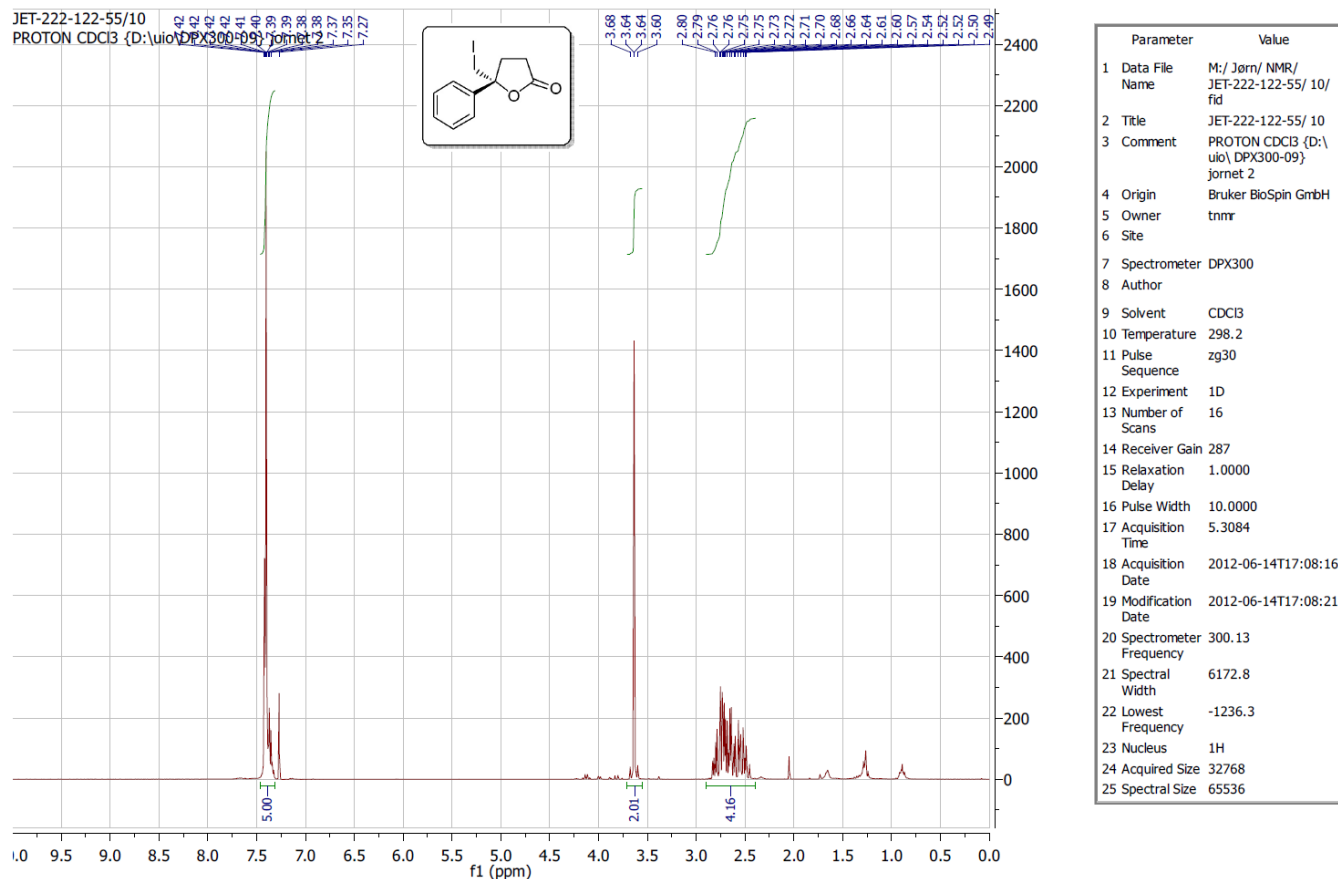

Figure S-53  $^1\text{H}$ -NMR spectrum of compound 4a.

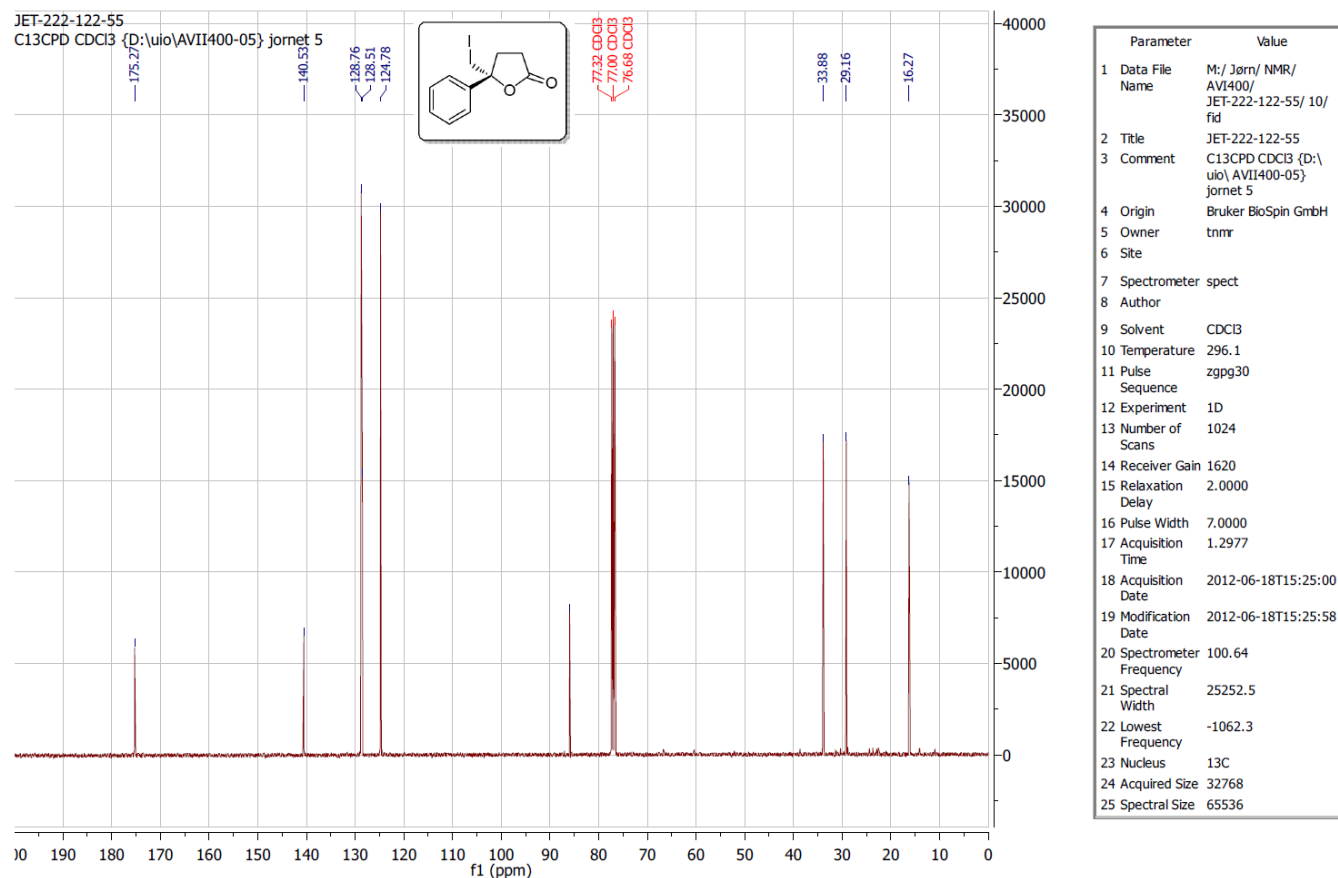

Figure S-54  $^{13}\text{C}$ -NMR spectrum of compound 4a.

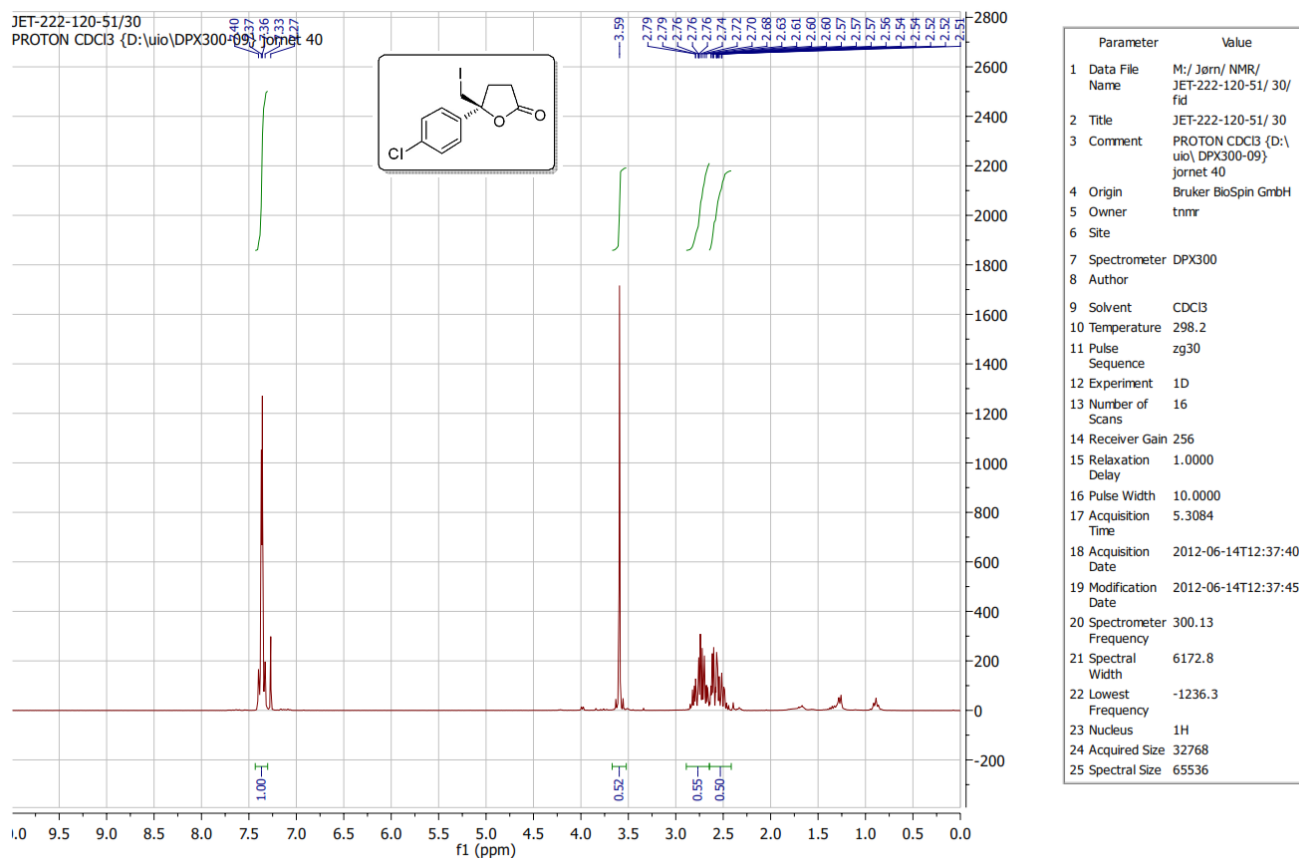

Figure S-55 <sup>1</sup>H-NMR spectrum of compound 4b.

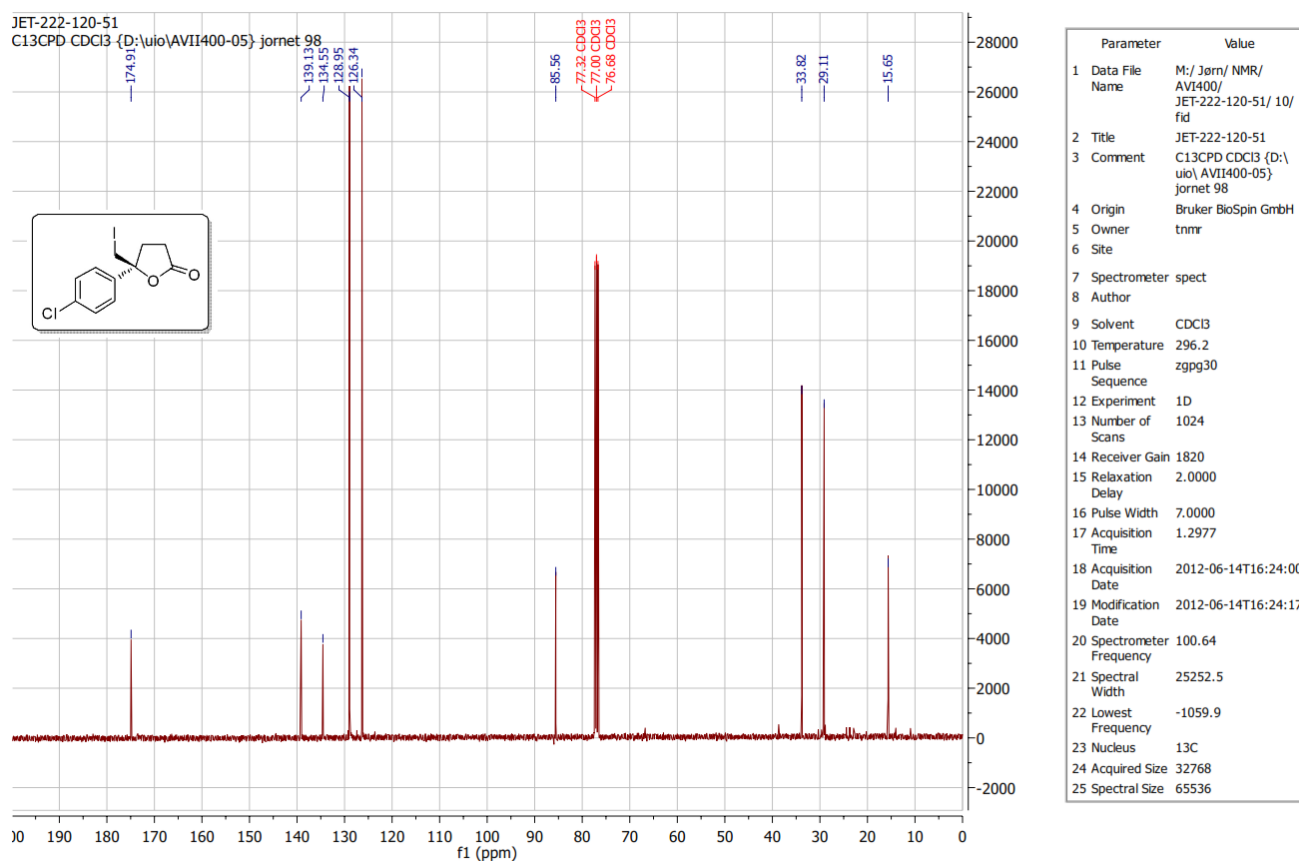

Figure S-56 <sup>13</sup>C-NMR spectrum of compound 4b.

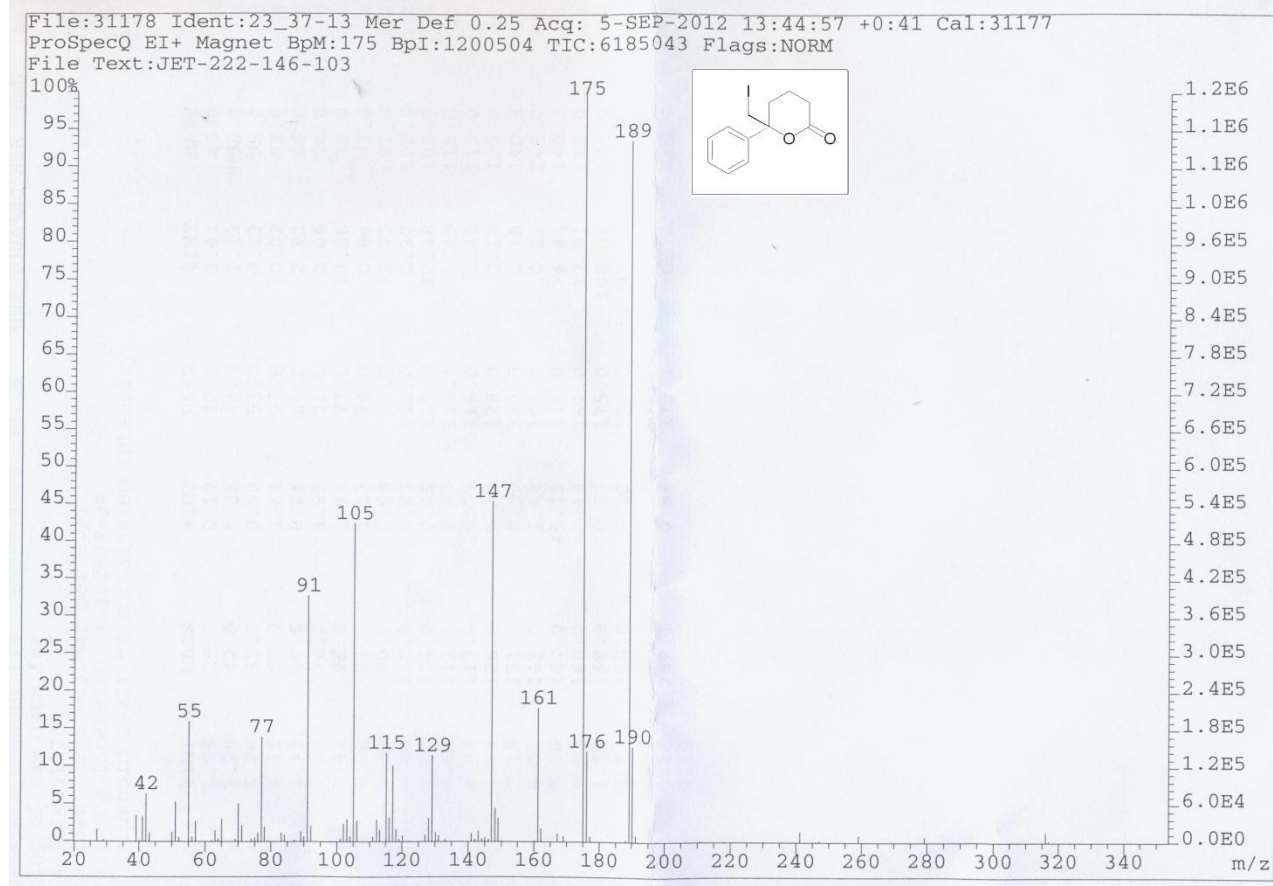

Figure S-57 MS spectrum of compound 2a.

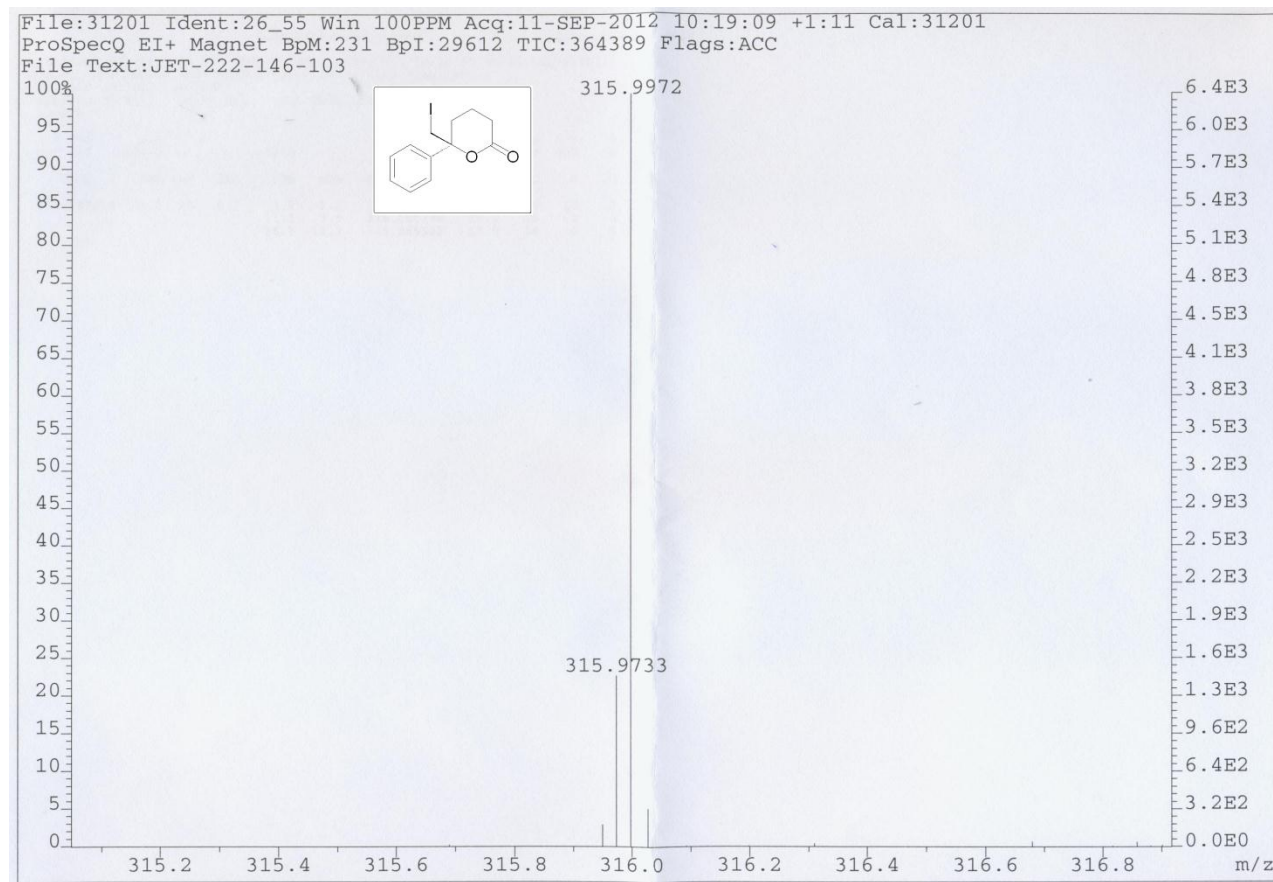

Figure S-58 HRMS spectrum of compound 2a.



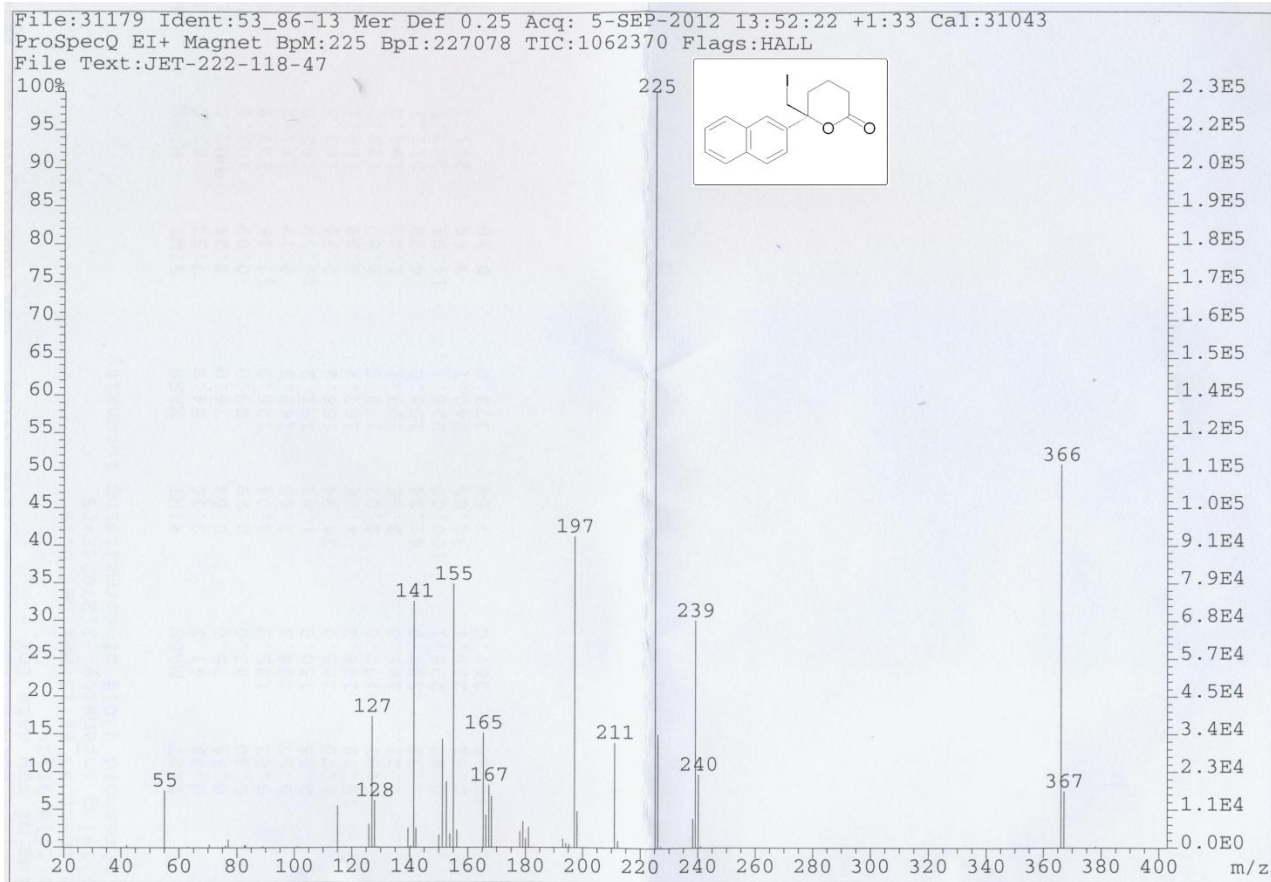

Figure S-59 MS spectrum of compound 2b.

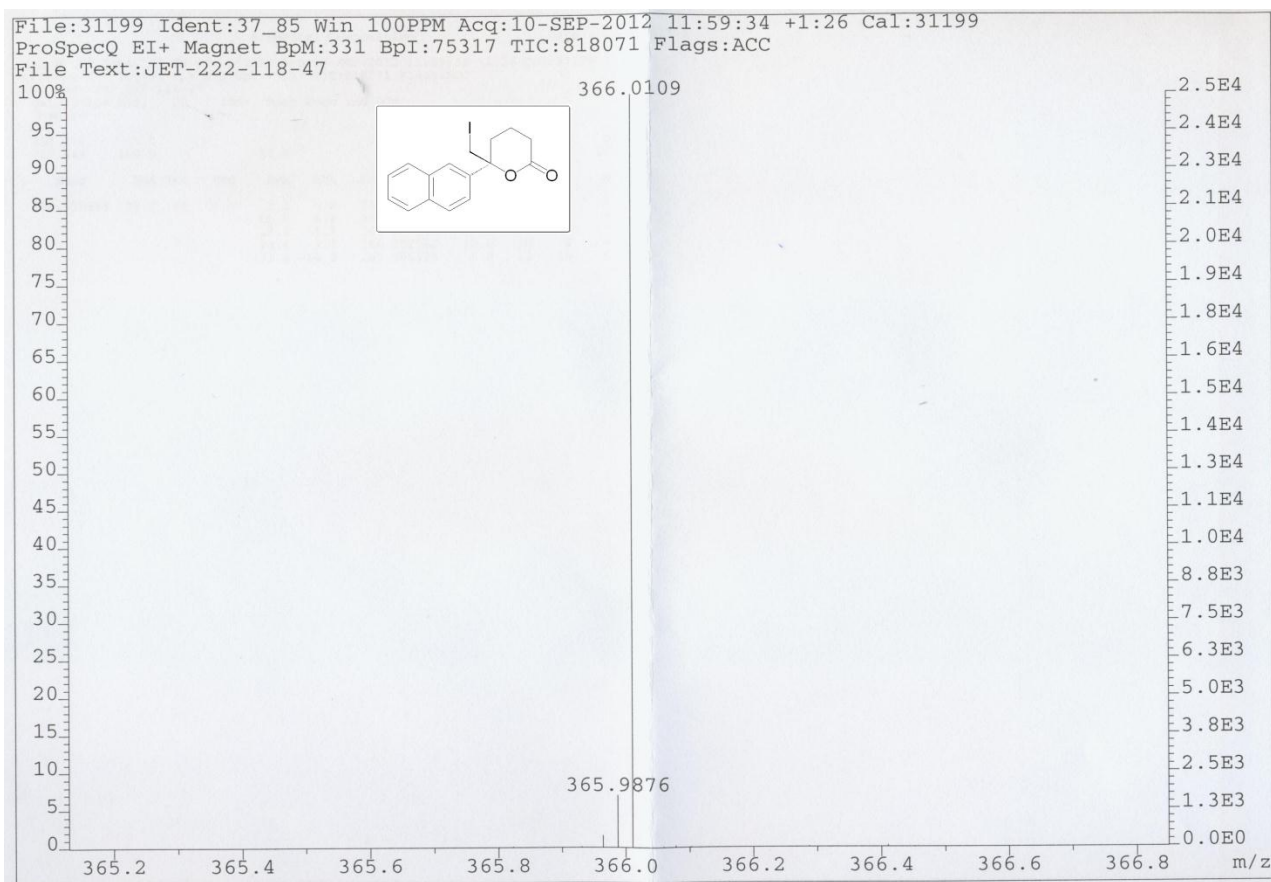

Figure S-60 HRMS spectrum of compound 2b.

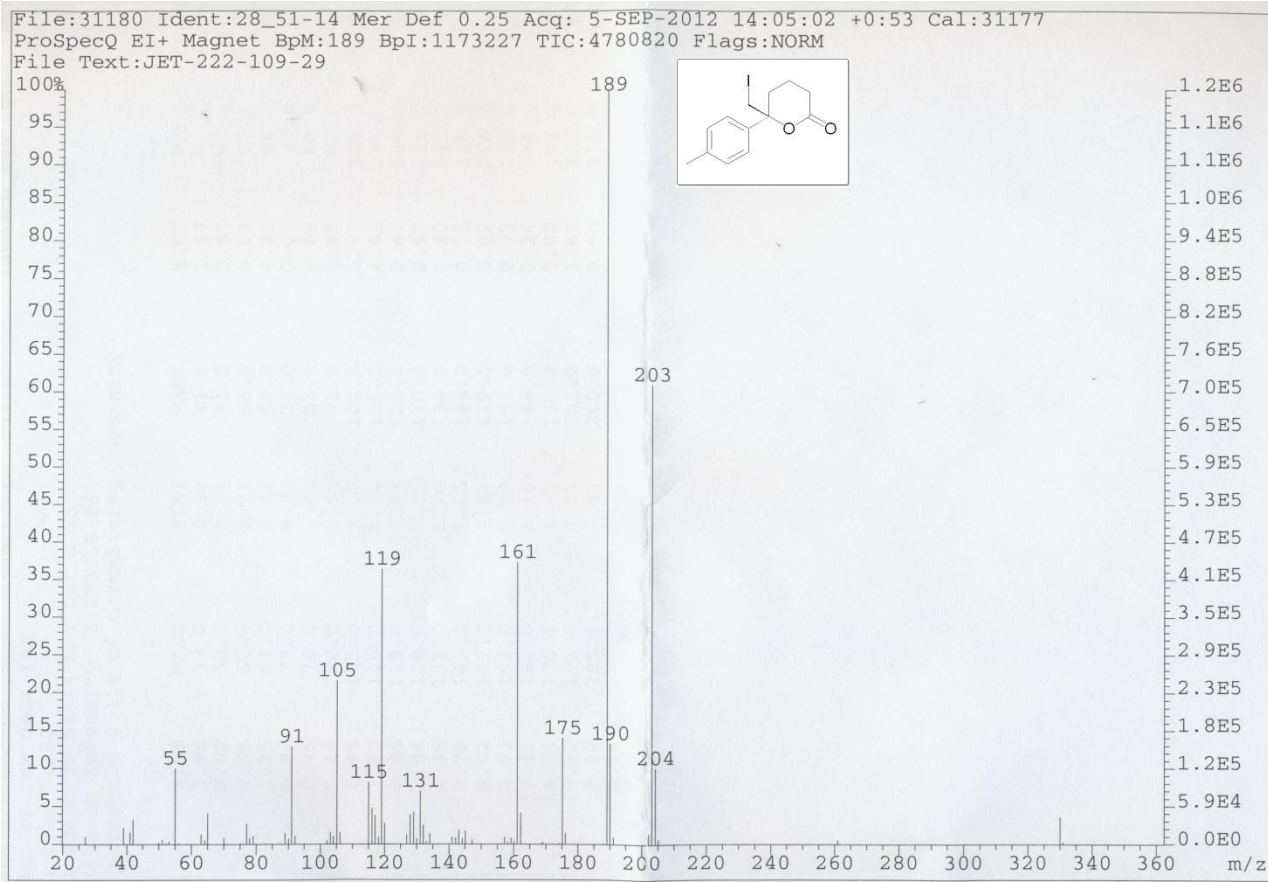

Figure S-61 MS spectrum of compound 2c.

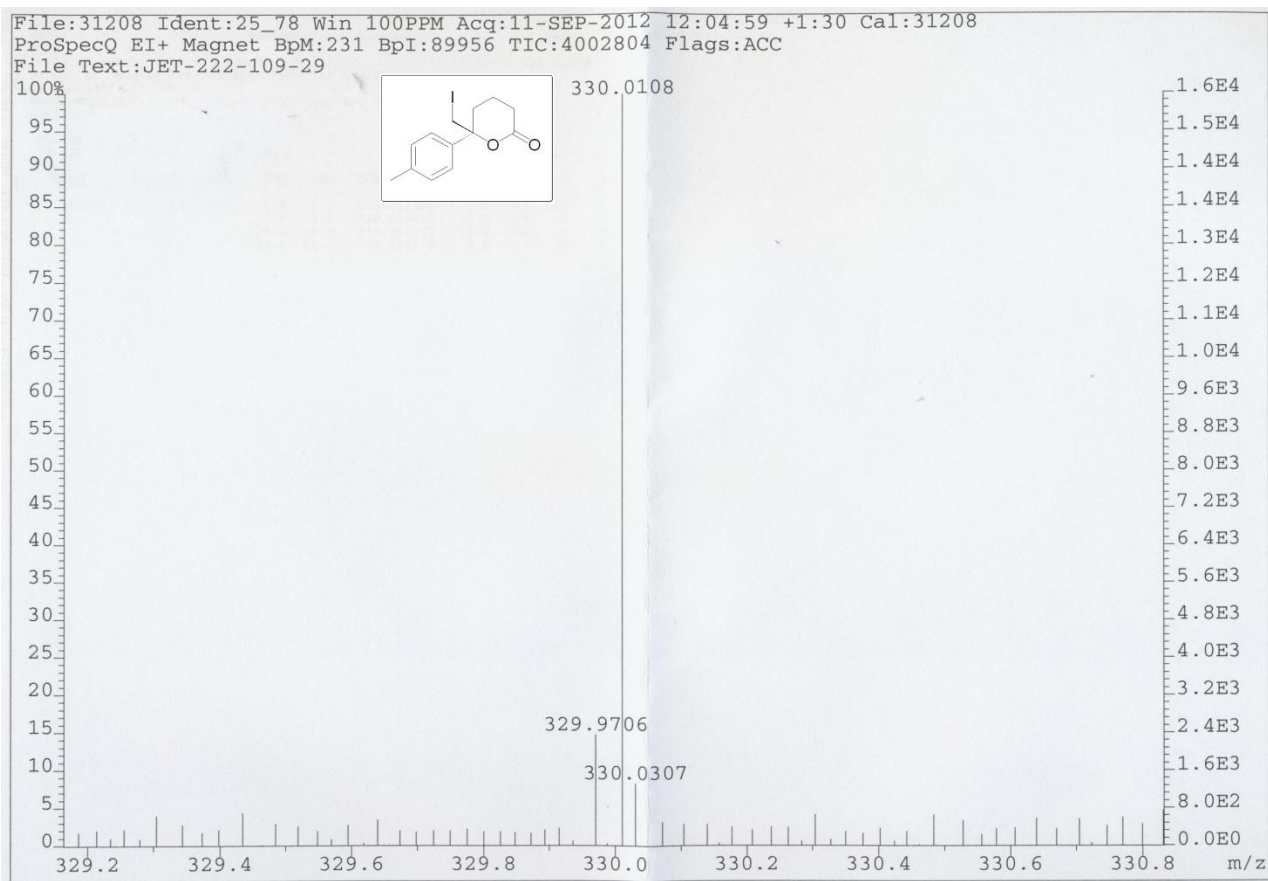

Figure S-62 HRMS spectrum of compound 2c.

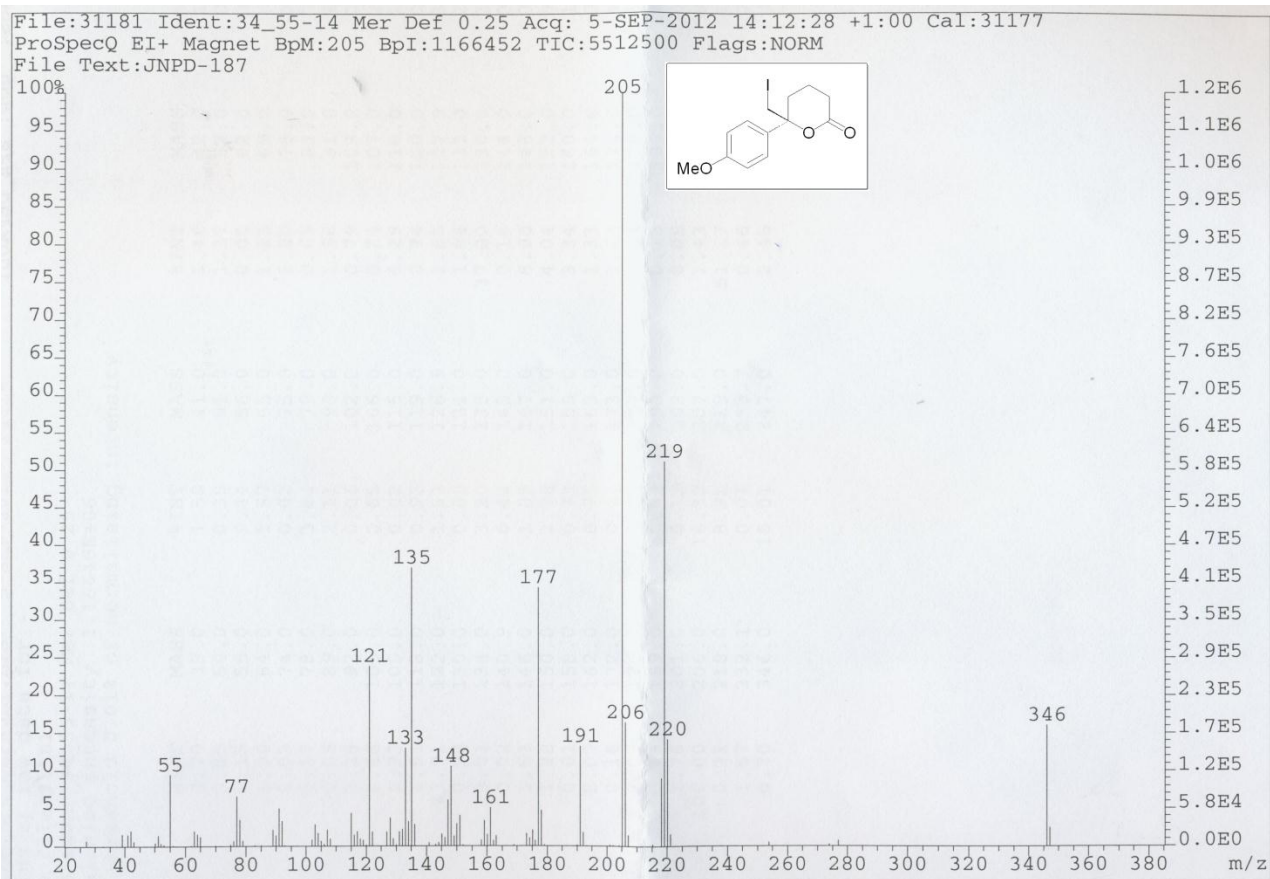

Figure S-63 MS spectrum of compound 2d.

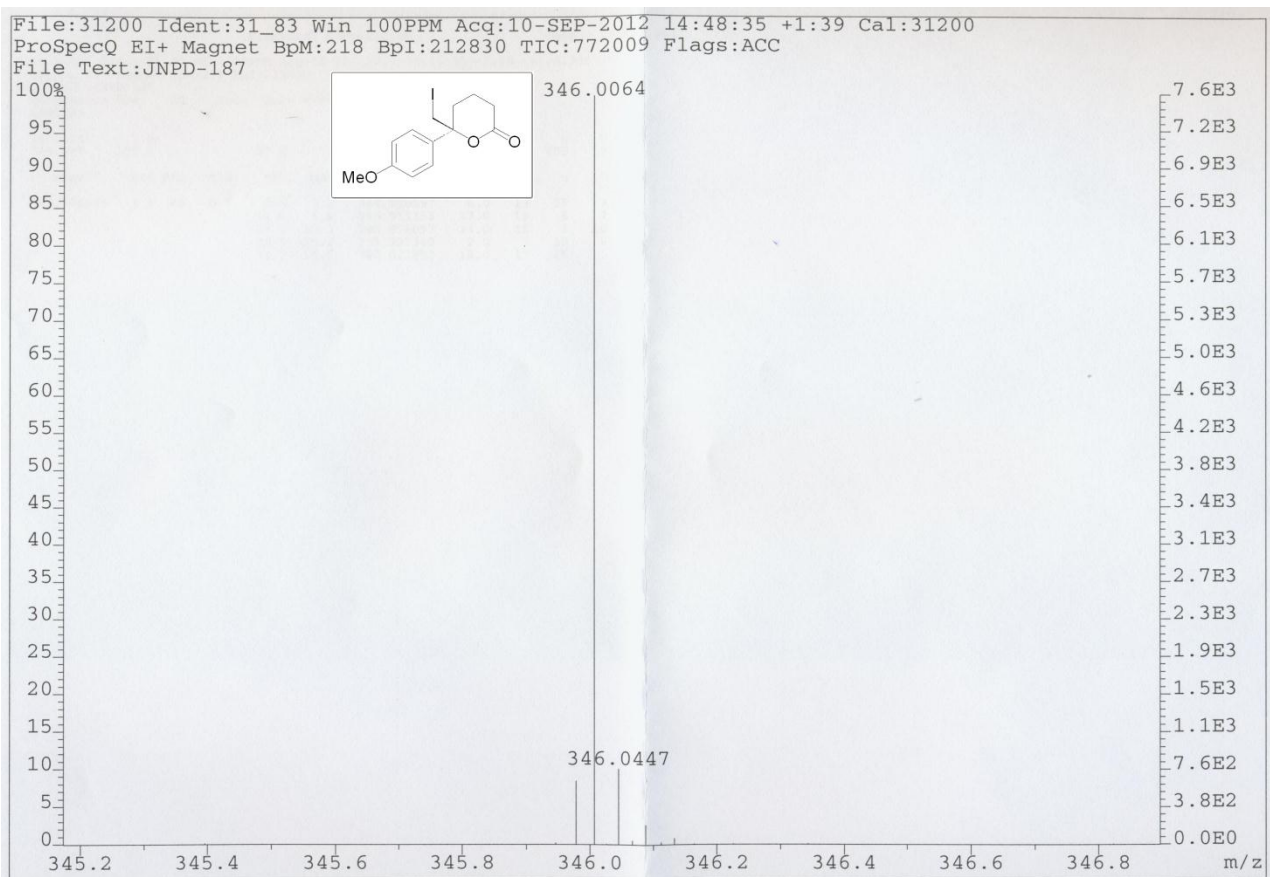

Figure S-64 HRMS spectrum of compound 2d.



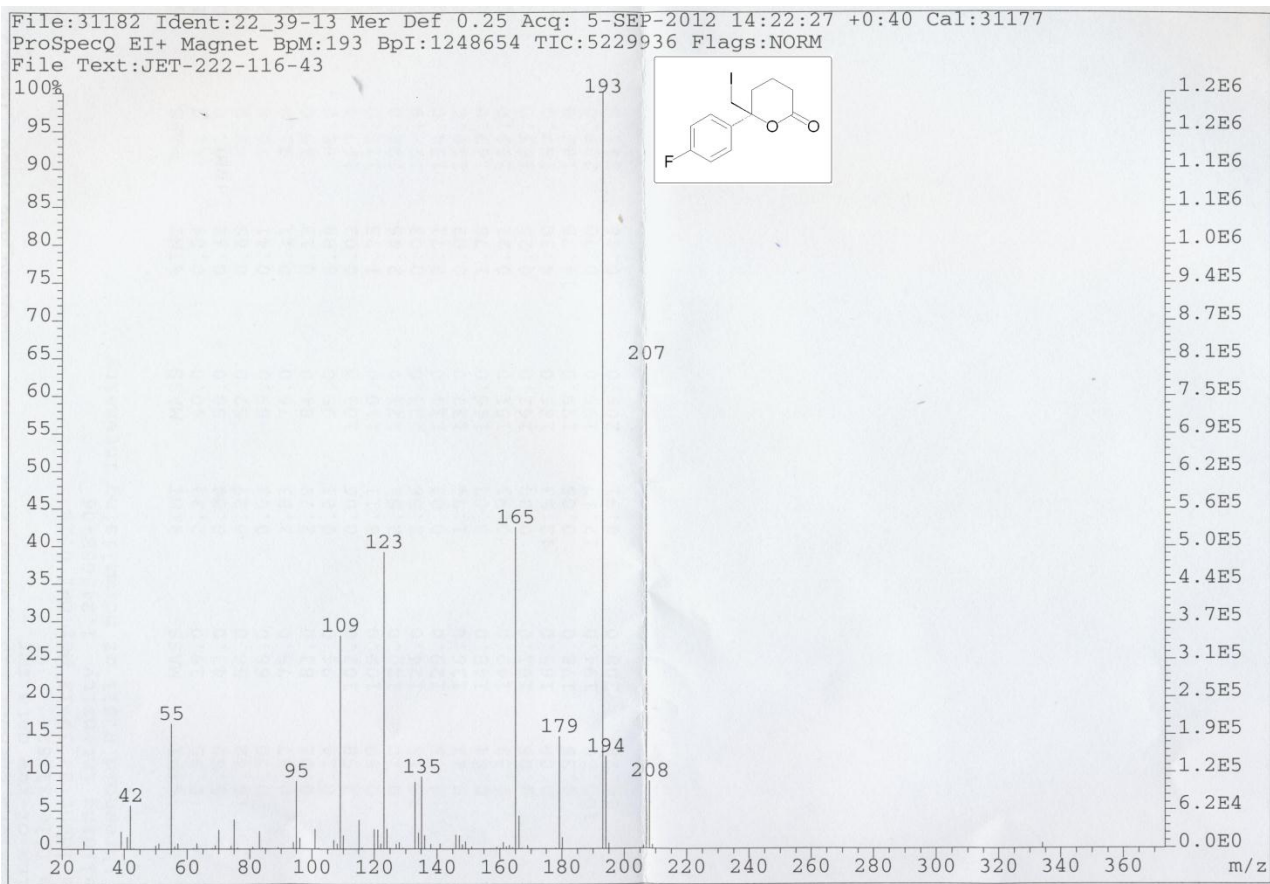

Figure S-65 MS spectrum of compound 2e.

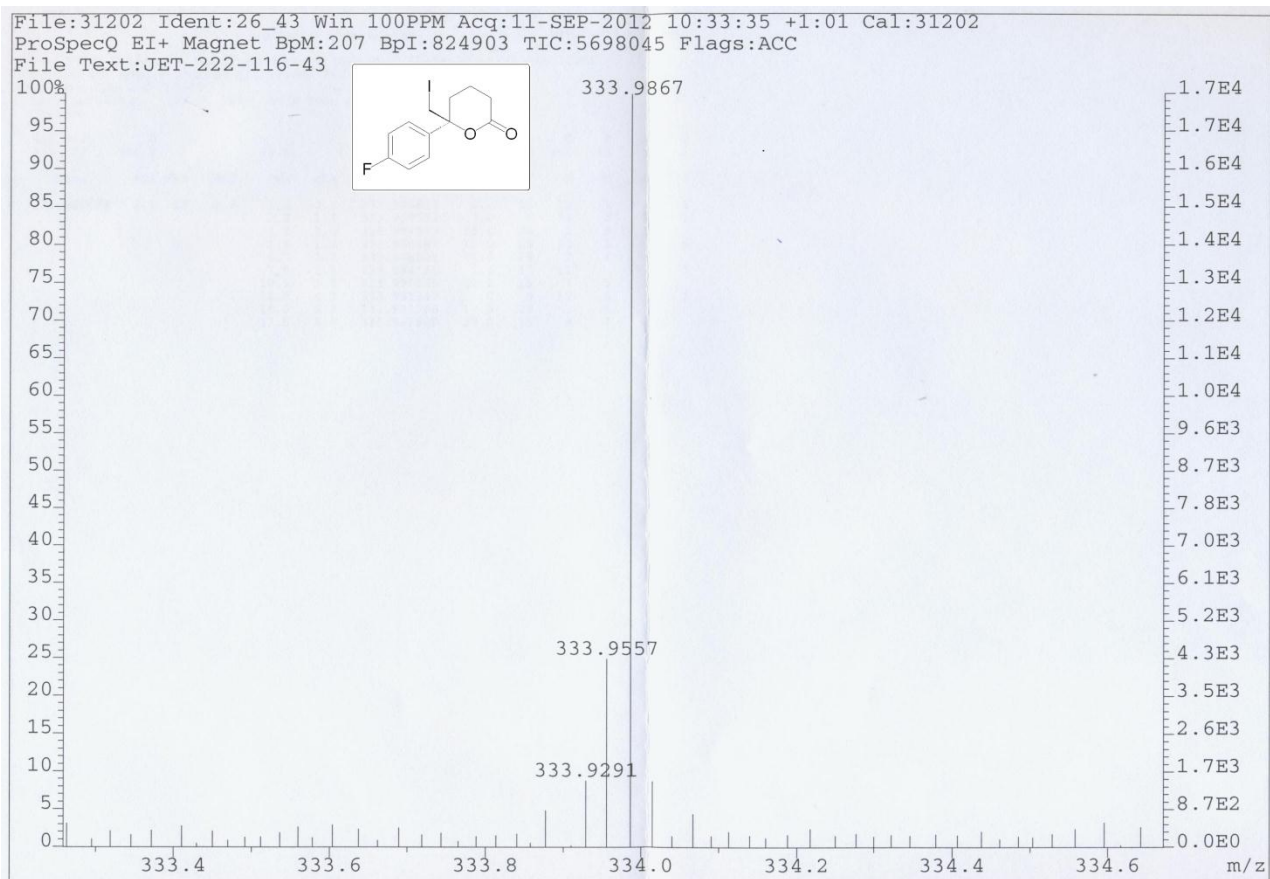

Figure S-66 HRMS spectrum of compound 2e.

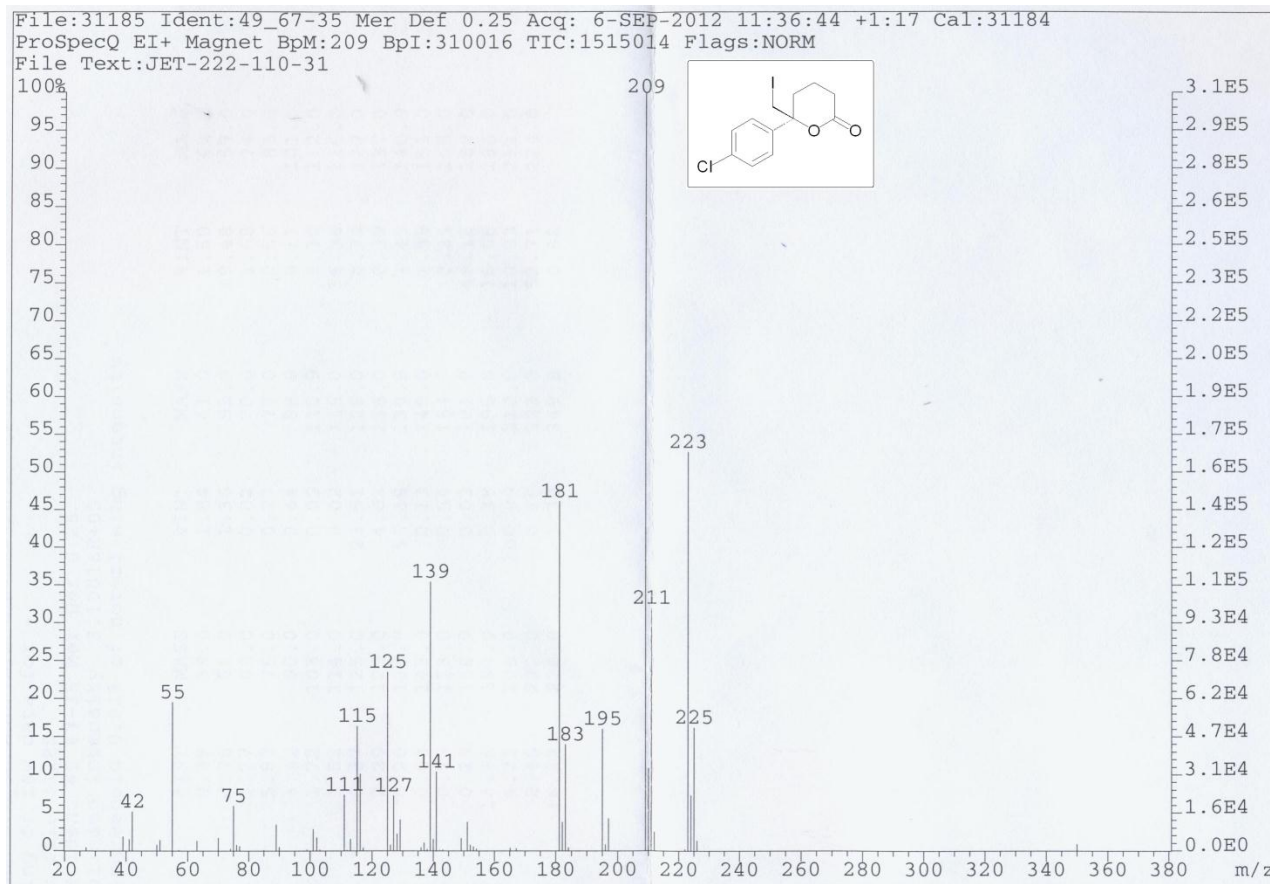

Figure S-67 MS spectrum of compound 2f.

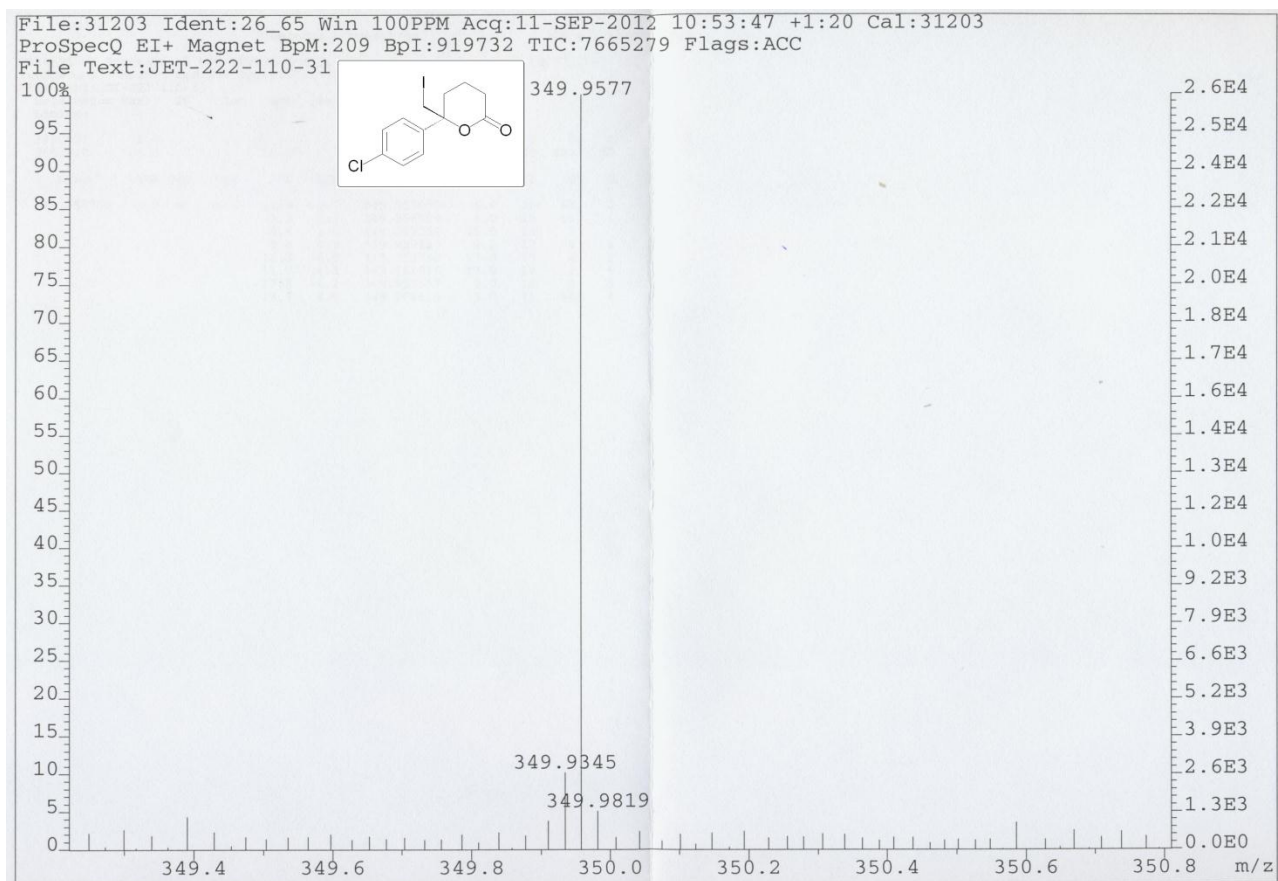

Figure S-68 HRMS spectrum of compound 2f.

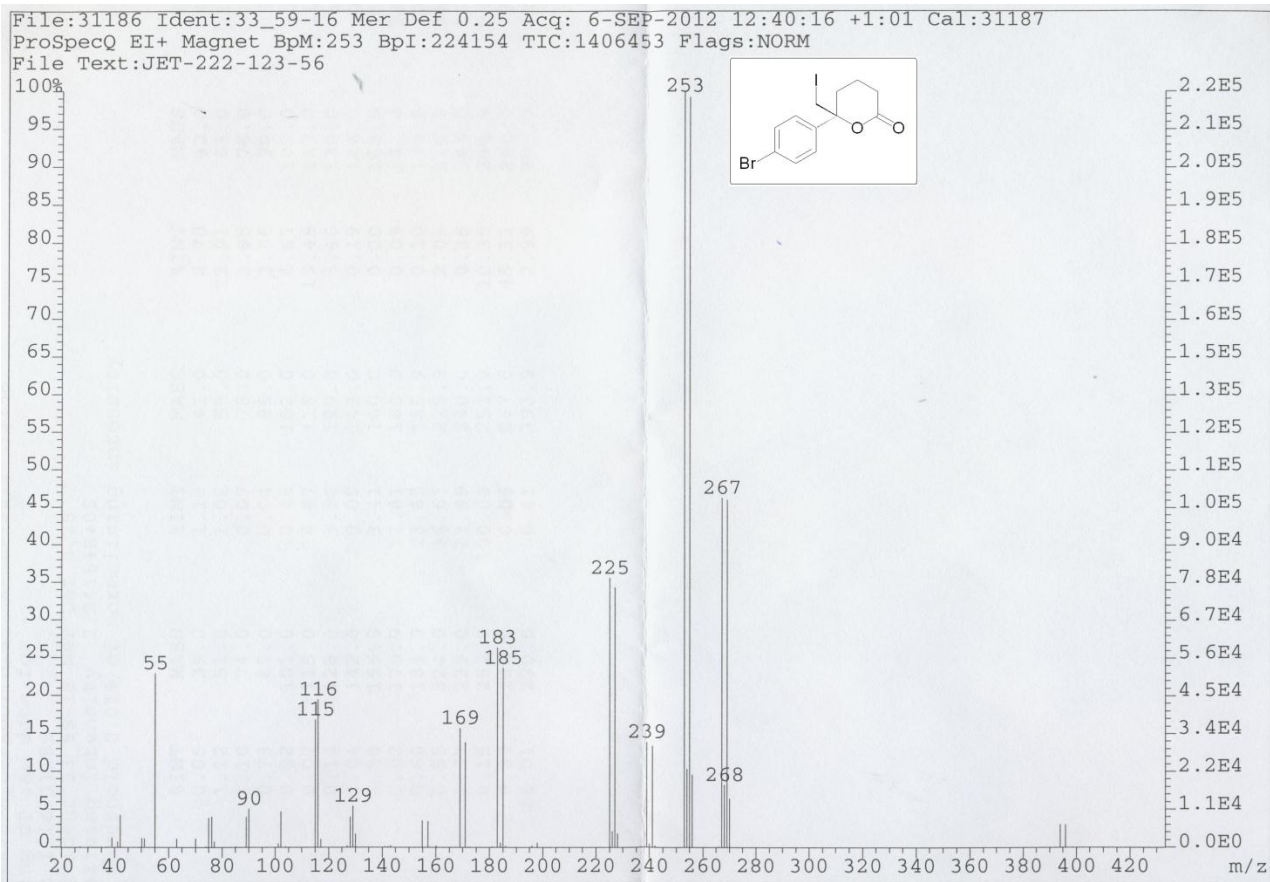

Figure S-69 MS spectrum of compound 2g.

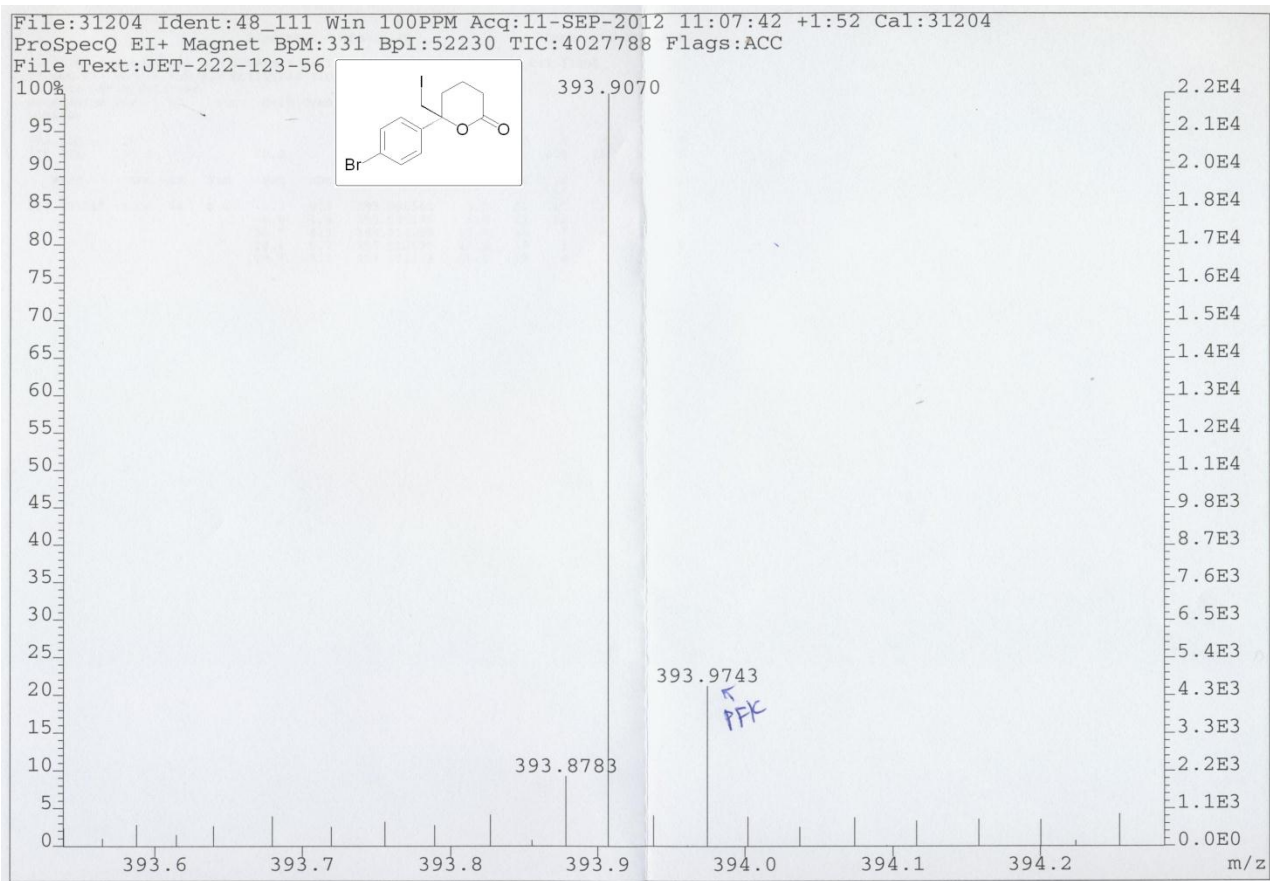

Figure S-70 HRMS spectrum of compound 2g.



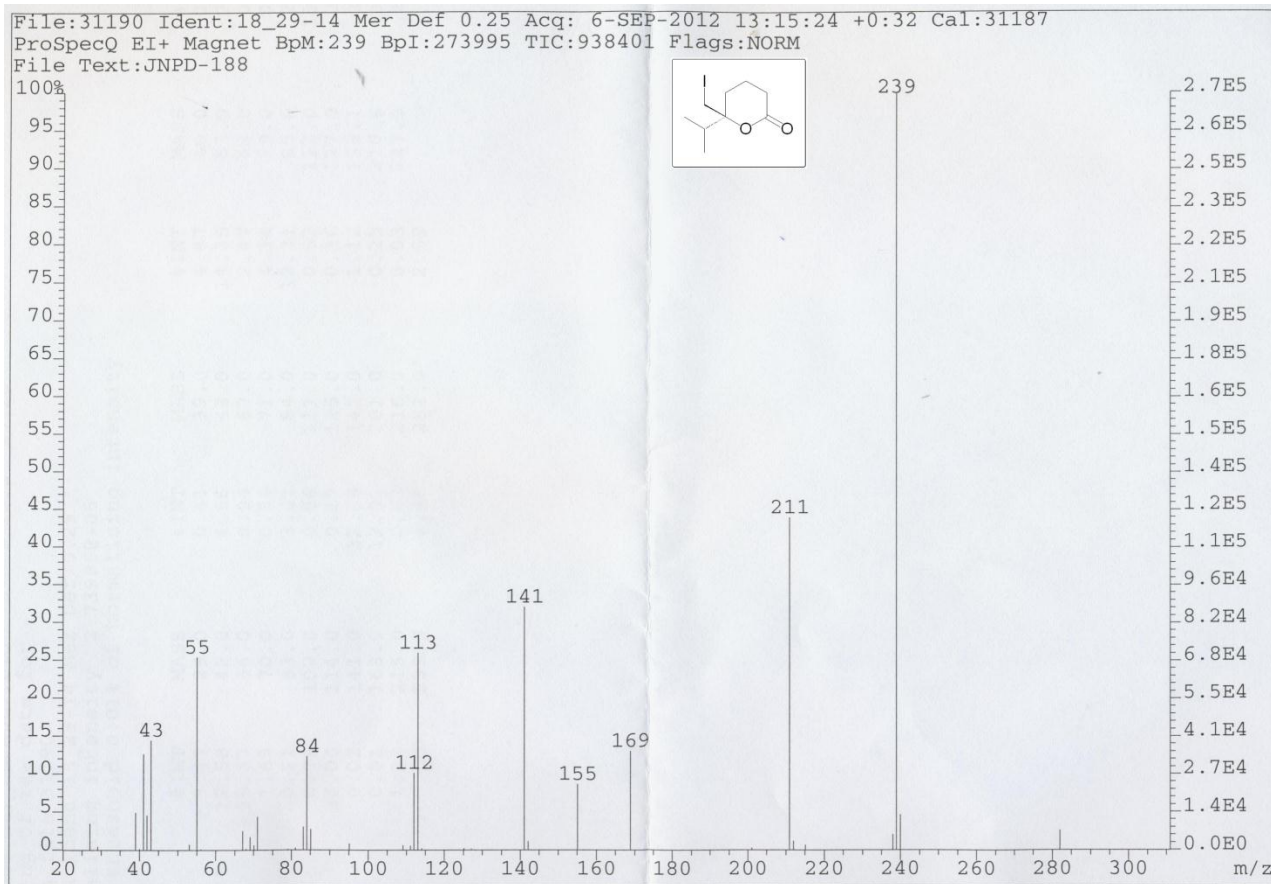

Figure S-71 MS spectrum of compound **2h**.

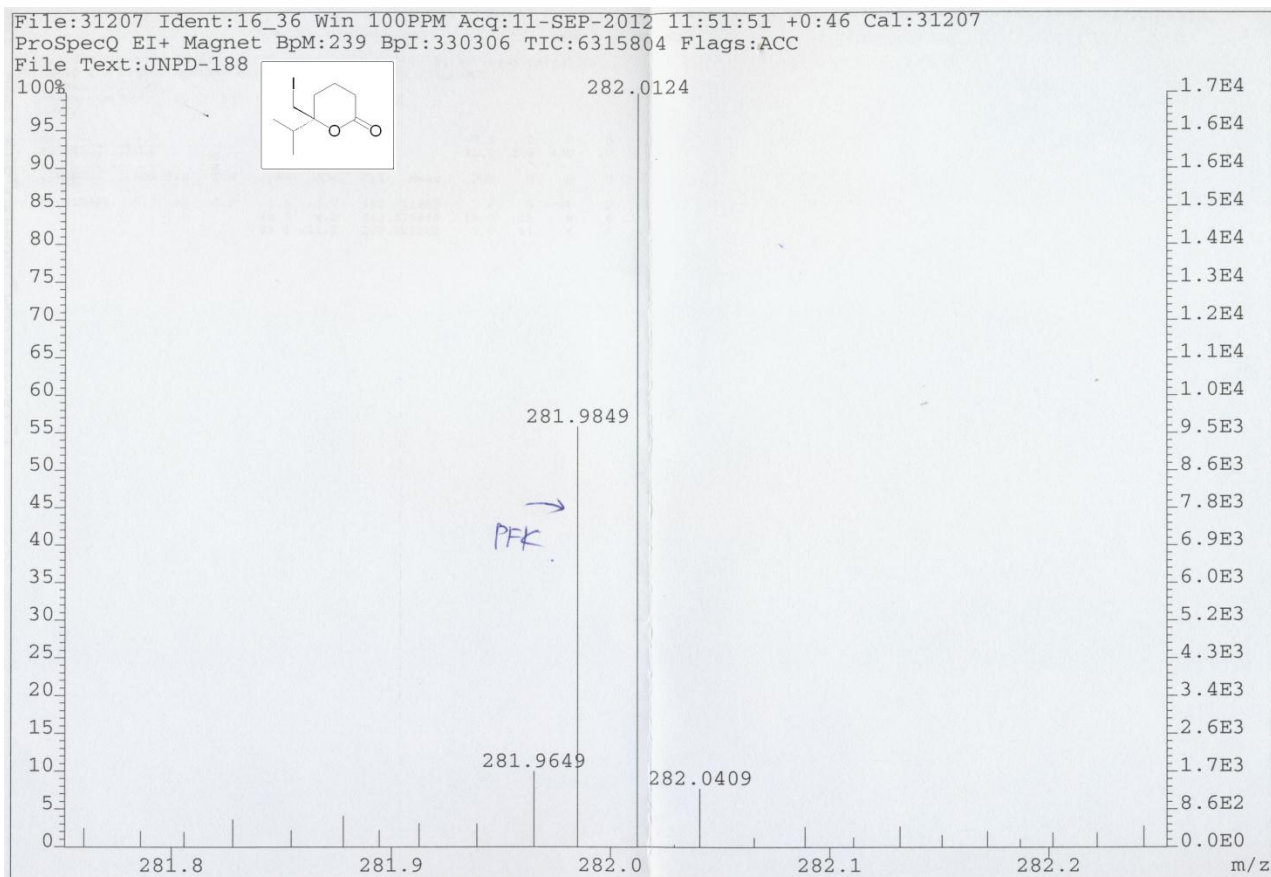

Figure S-72 HRMS spectrum of compound **2h**.

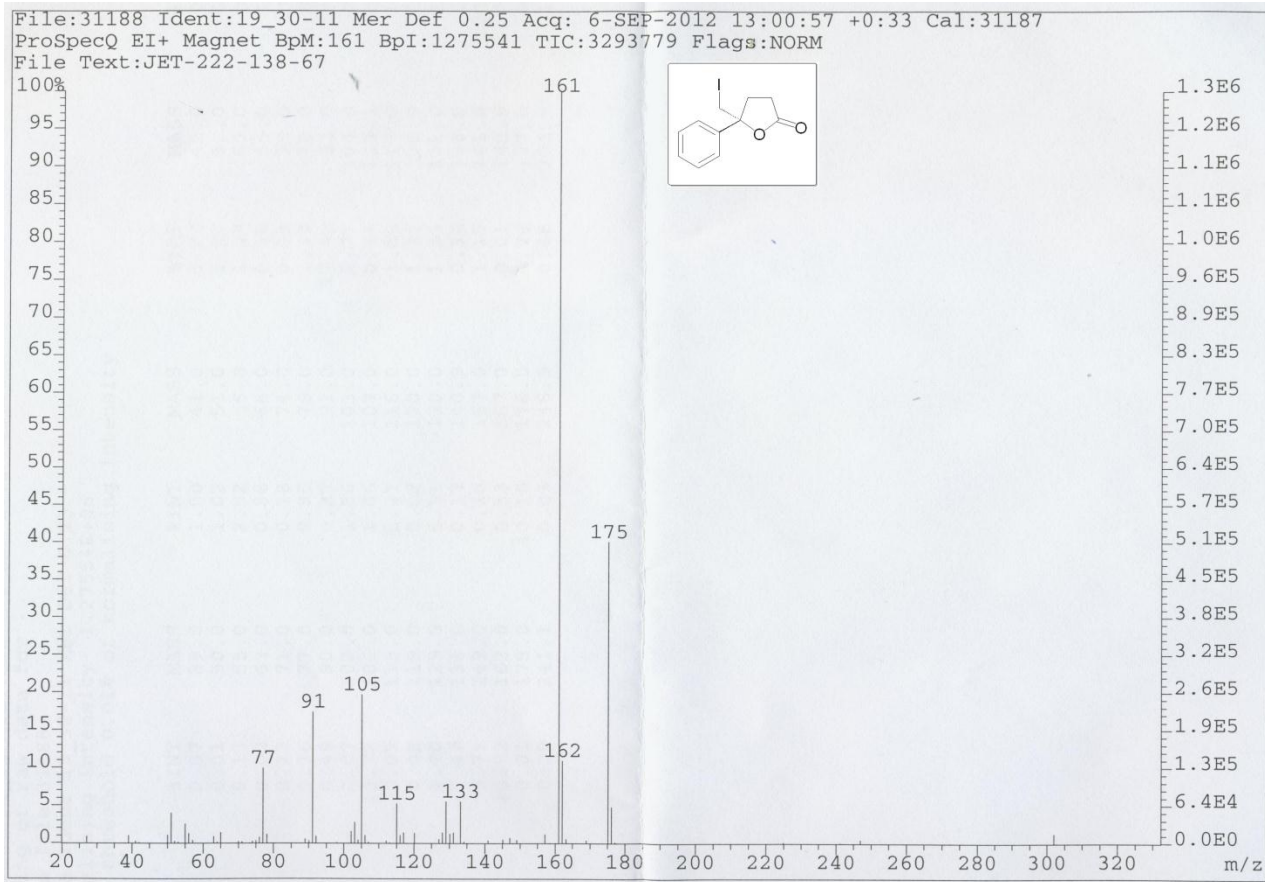

Figure S-73 MS spectrum of compound 4a.

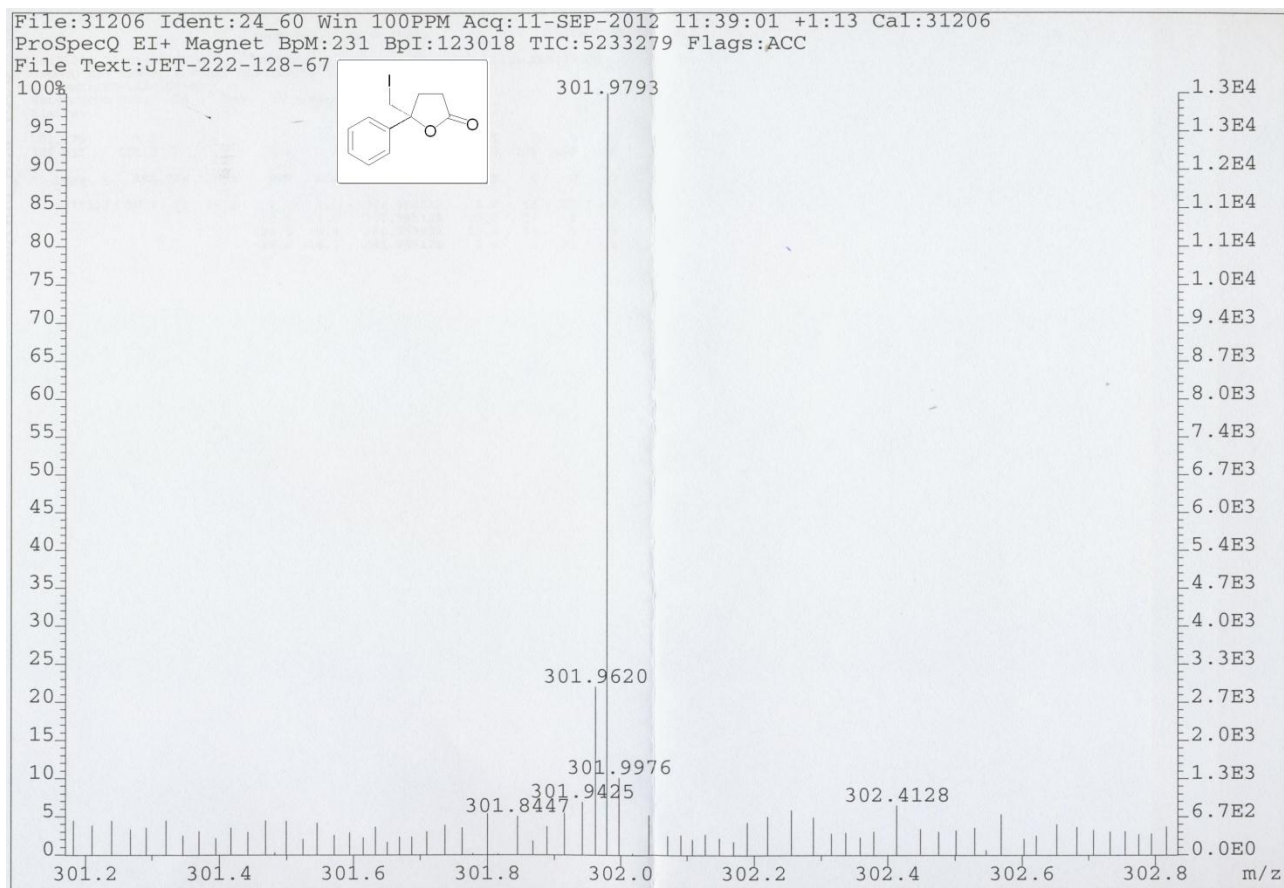

Figure S-74 HRMS spectrum of compound 4a.

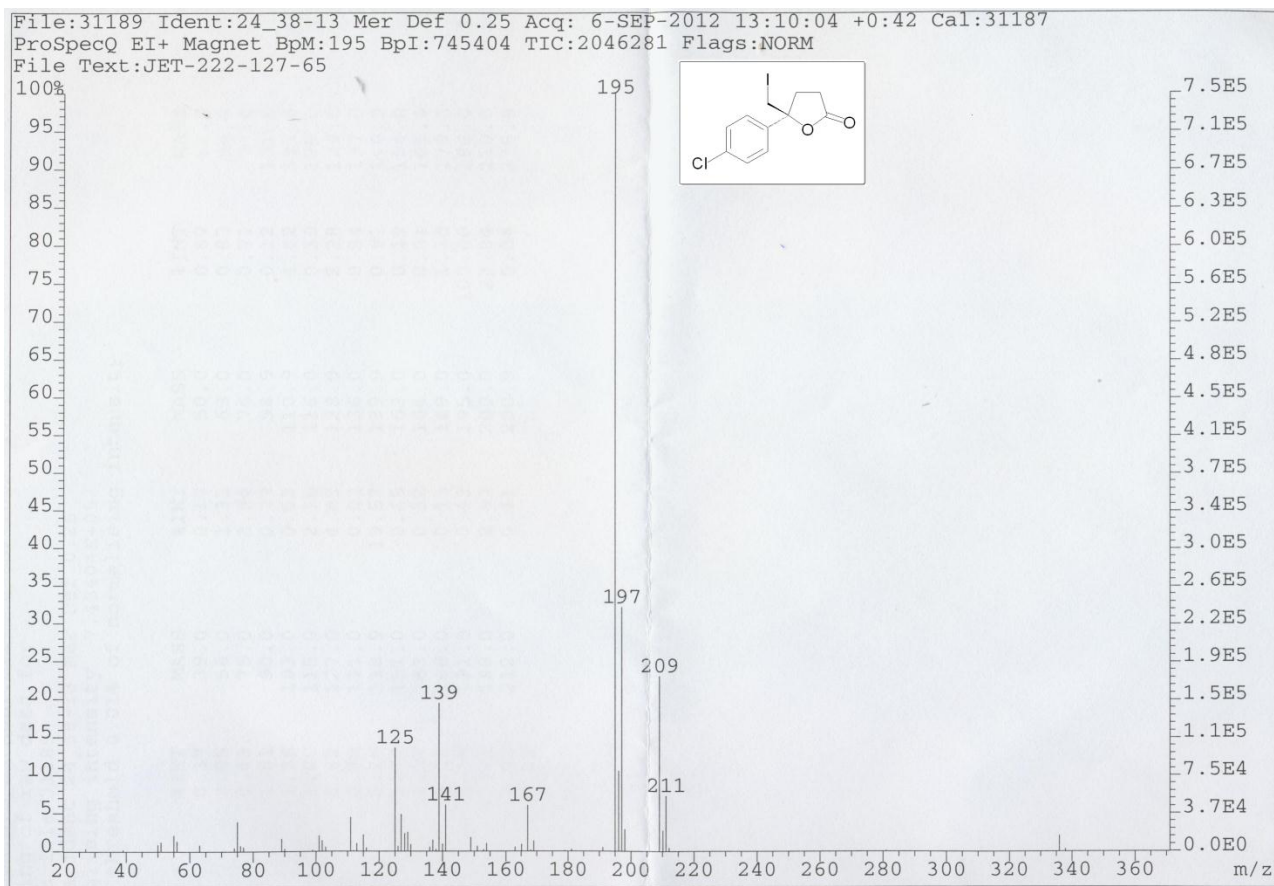

Figure S-75 MS spectrum of compound 4b.

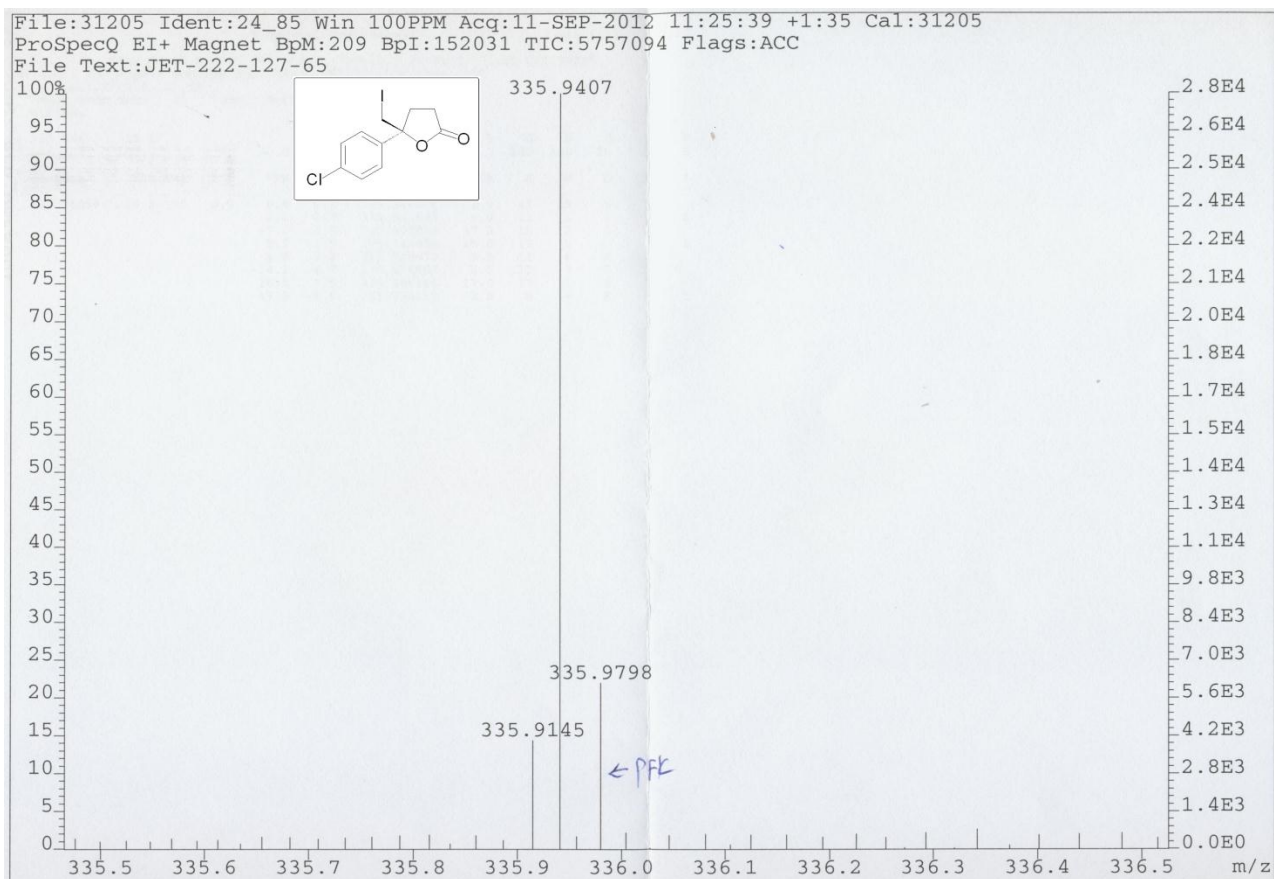

Figure S-76 HRMS spectrum of compound 4b.



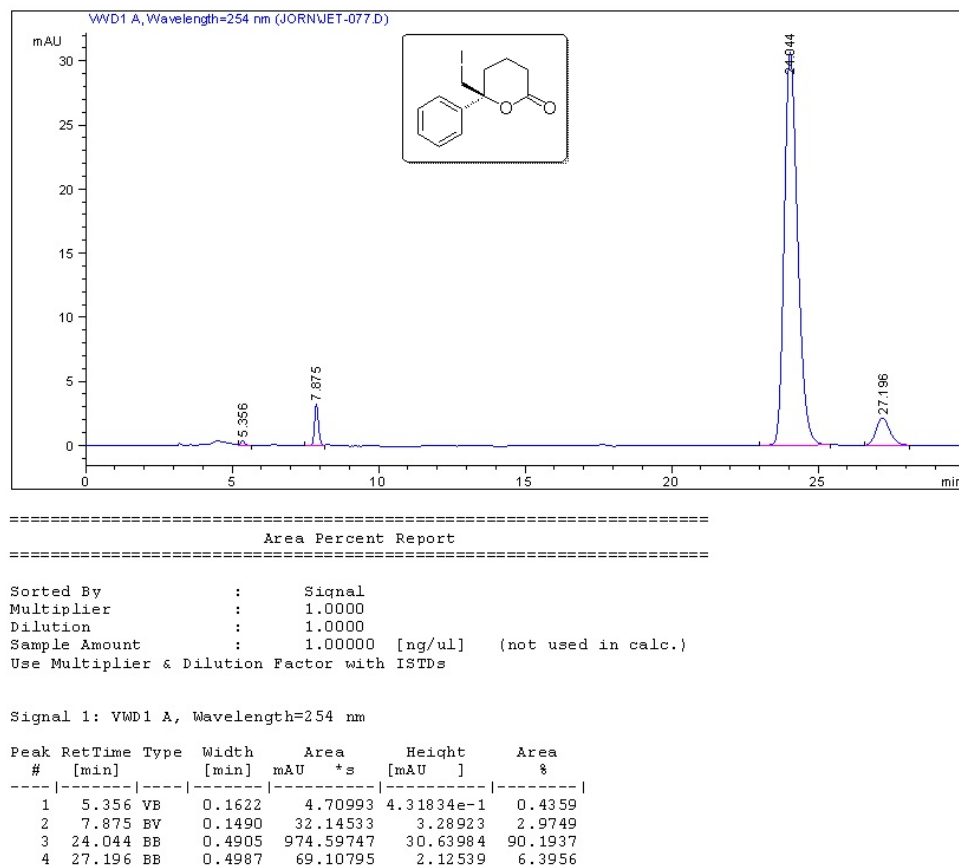

Figure S-77 HPLC chromatogram of chiral compound **2a**.

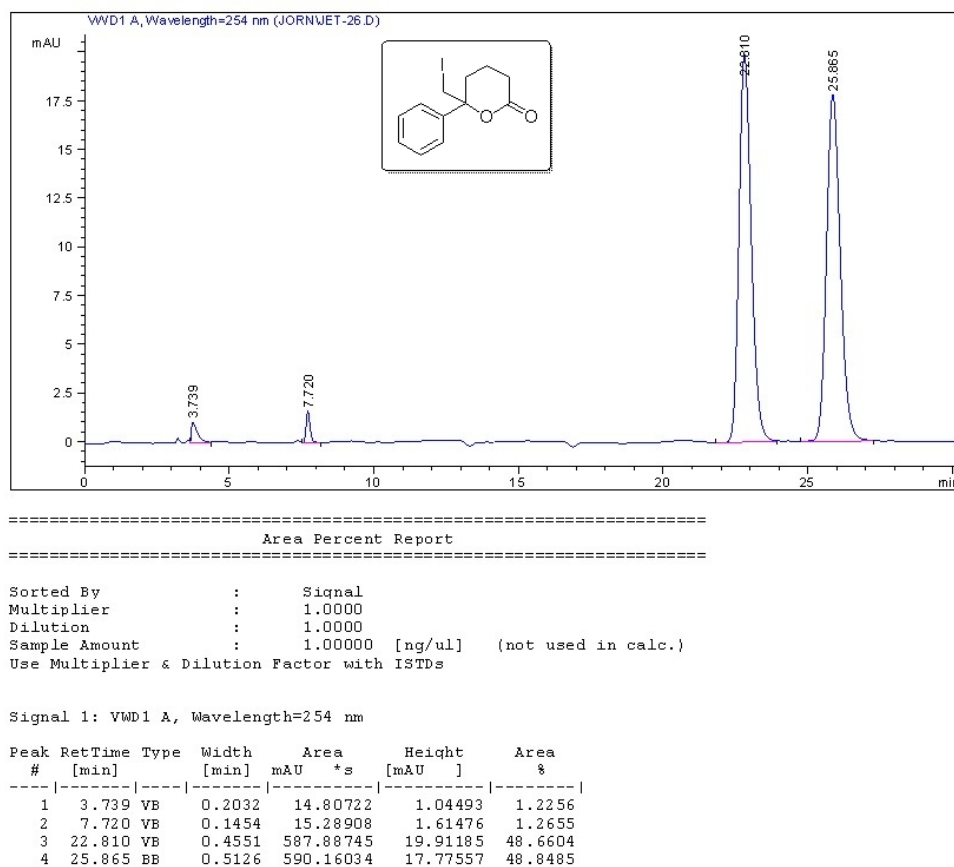

Figure S-78 HPLC chromatogram of racemic compound **2a**.



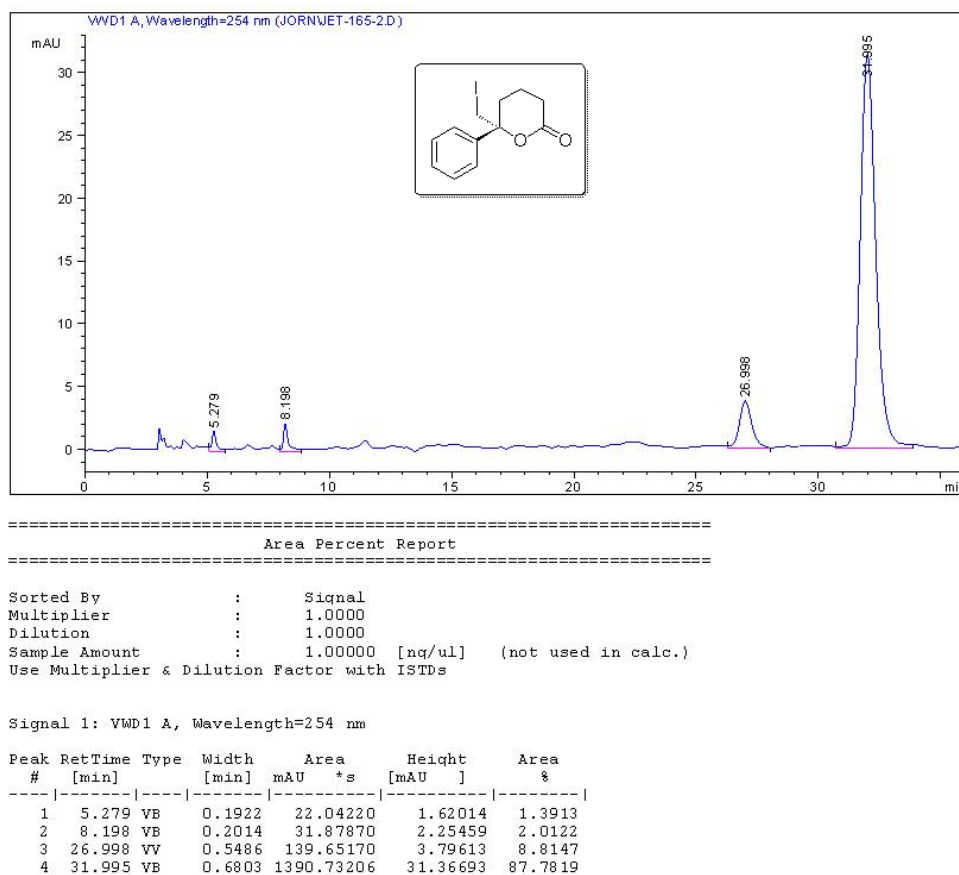

Figure S-79 HPLC chromatogram of chiral compound *ent*-2a.



Figure S-80 HPLC chromatogram of racemic compound 2a.

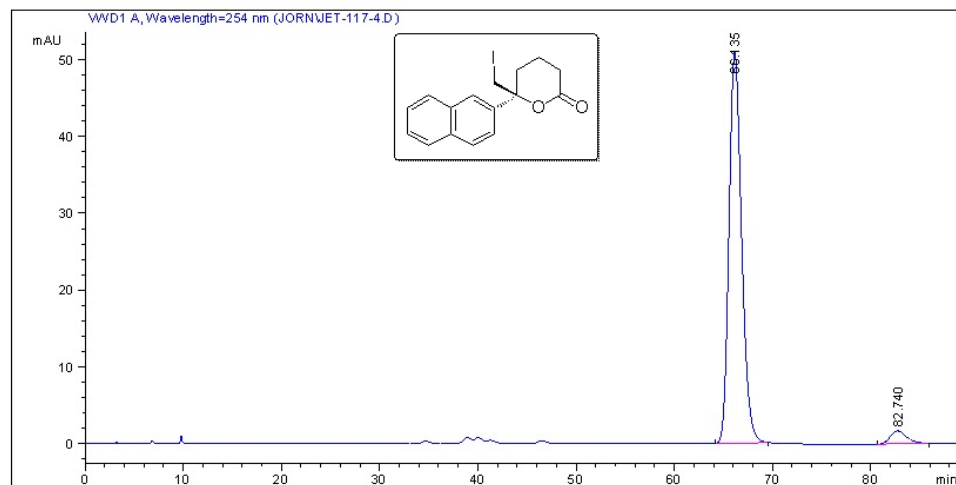

```

=====
                        Area Percent Report
=====
Sorted By      :      Signal
Multiplier     :      1.0000
Dilution       :      1.0000
Sample Amount  :      1.00000 [ng/ul]   (not used in calc.)
Use Multiplier & Dilution Factor with ISTDs

```

Signal 1: VMD1 A, Wavelength=254 nm

| Peak # | RetTime [min] | Type | Width [min] | Area mAU   | Area *s  | Height [mAU] | Area % |
|--------|---------------|------|-------------|------------|----------|--------------|--------|
| 1      | 66.135        | BB   | 1.3795      | 4541.92334 | 51.01031 | 95.8606      |        |
| 2      | 82.740        | BB   | 1.3748      | 196.12740  | 1.68219  | 4.1394       |        |

**Figure S-81** HPLC chromatogram of chiral compound **2b**.

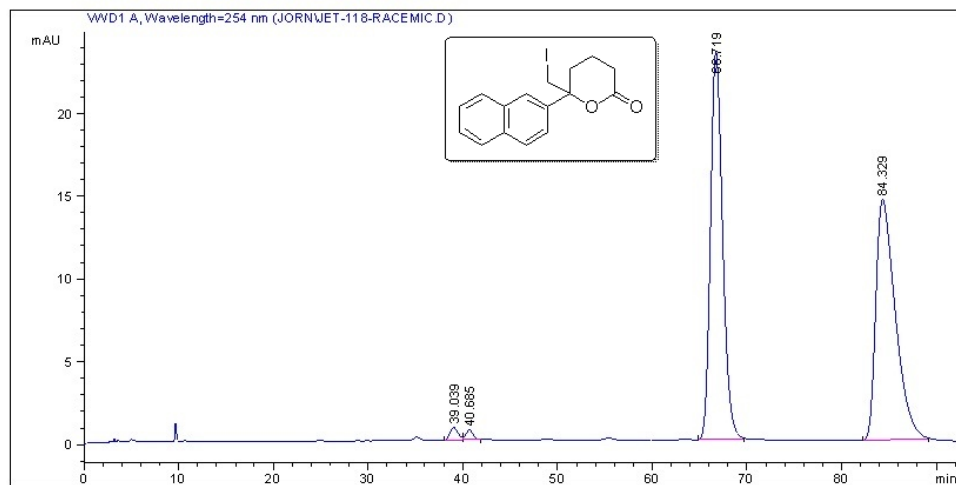

```

=====
                        Area Percent Report
=====
Sorted By      :      Signal
Multiplier     :      1.0000
Dilution       :      1.0000
Sample Amount  :      1.00000 [ng/ul]   (not used in calc.)
Use Multiplier & Dilution Factor with ISTDs

```

Signal 1: VMD1 A, Wavelength=254 nm

| Peak # | RetTime [min] | Type | Width [min] | Area mAU   | Area *s    | Height [mAU] | Area % |
|--------|---------------|------|-------------|------------|------------|--------------|--------|
| 1      | 39.039        | BV   | 0.7115      | 44.73745   | 7.60013e-1 | 1.0564       |        |
| 2      | 40.685        | VB   | 0.6518      | 31.29905   | 5.93316e-1 | 0.7391       |        |
| 3      | 66.719        | BB   | 1.3373      | 2082.88916 | 23.42559   | 49.1862      |        |
| 4      | 84.329        | BB   | 1.9874      | 2075.78003 | 14.51388   | 49.0183      |        |

**Figure S-82** HPLC chromatogram of racemic compound **2b**.

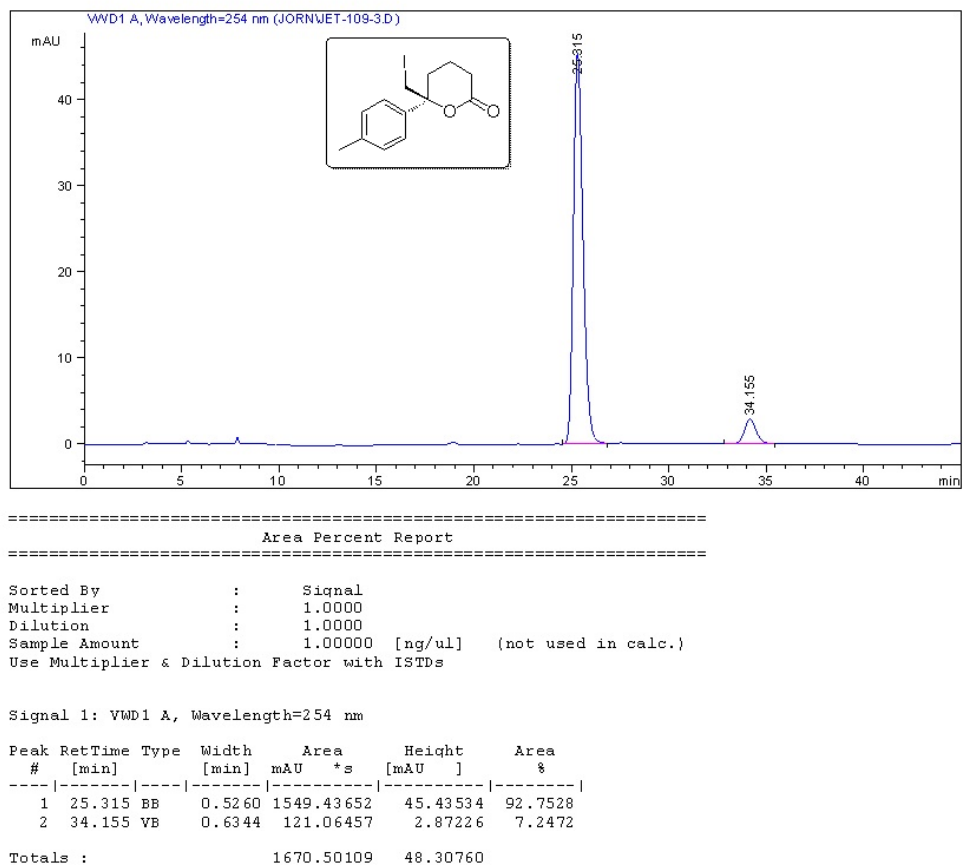

Figure S-83 HPLC chromatogram of chiral compound 2c.

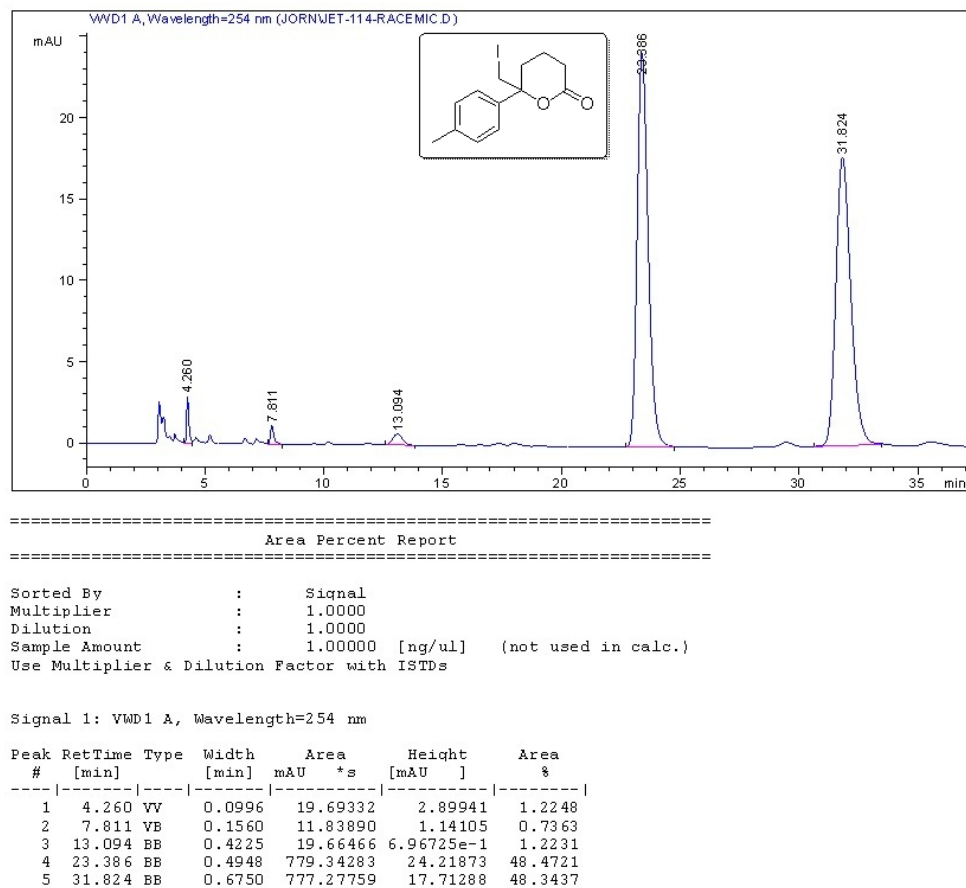

Figure S-84 HPLC chromatogram of racemic compound 2c.

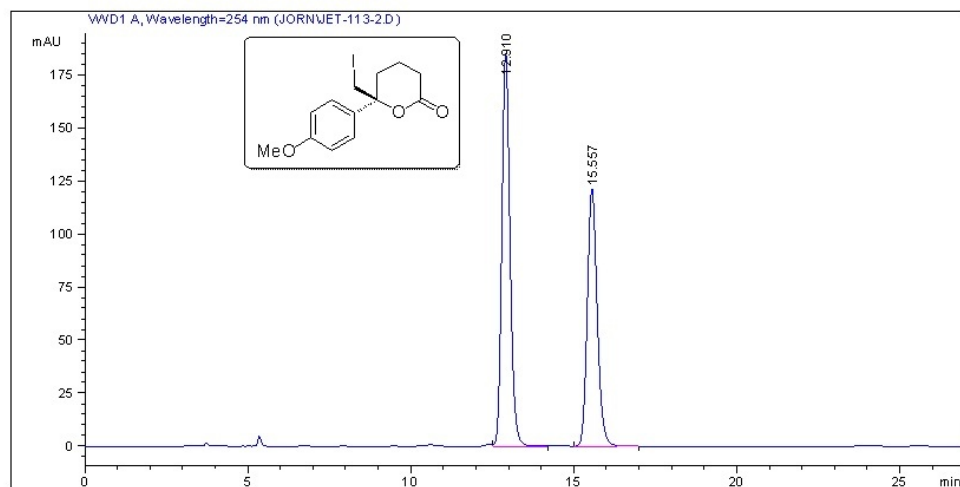

=====  
 Area Percent Report  
 =====

Sorted By : Signal  
 Multiplier : 1.0000  
 Dilution : 1.0000  
 Sample Amount : 1.00000 [ng/ul] (not used in calc.)  
 Use Multiplier & Dilution Factor with ISTDs

Signal 1: VWD1 A, Wavelength=254 nm

| Peak # | RetTime [min] | Type | Width [min] | Area mAU   | Area *s   | Height [mAU] | Area % |
|--------|---------------|------|-------------|------------|-----------|--------------|--------|
| 1      | 12.910        | VB   | 0.2723      | 3259.94897 | 185.27579 | 55.9150      |        |
| 2      | 15.557        | VB   | 0.3259      | 2570.23486 | 121.28237 | 44.0850      |        |

Figure S-85 HPLC chromatogram of chiral compound **2d**.

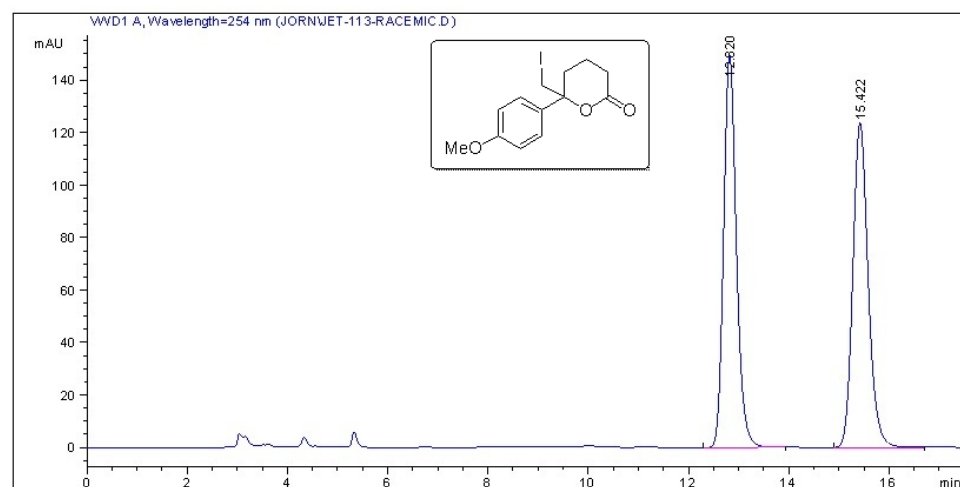

=====  
 Area Percent Report  
 =====

Sorted By : Signal  
 Multiplier : 1.0000  
 Dilution : 1.0000  
 Sample Amount : 1.00000 [ng/ul] (not used in calc.)  
 Use Multiplier & Dilution Factor with ISTDs

Signal 1: VWD1 A, Wavelength=254 nm

| Peak # | RetTime [min] | Type | Width [min] | Area mAU   | Area *s   | Height [mAU] | Area % |
|--------|---------------|------|-------------|------------|-----------|--------------|--------|
| 1      | 12.820        | VB   | 0.2717      | 2645.92920 | 149.69565 | 50.1674      |        |
| 2      | 15.422        | BB   | 0.3265      | 2628.27539 | 123.70401 | 49.8326      |        |

Figure S-86 HPLC chromatogram of racemic compound **2d**.

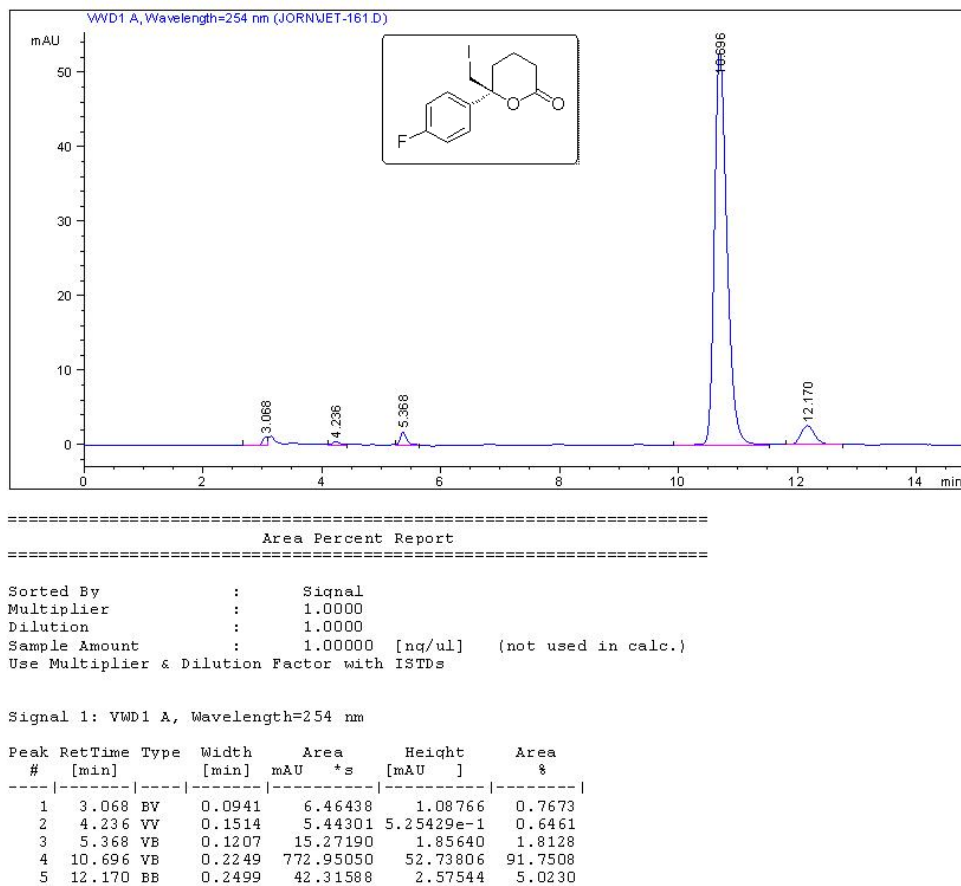

Figure S-87 HPLC chromatogram of chiral compound **2e**.

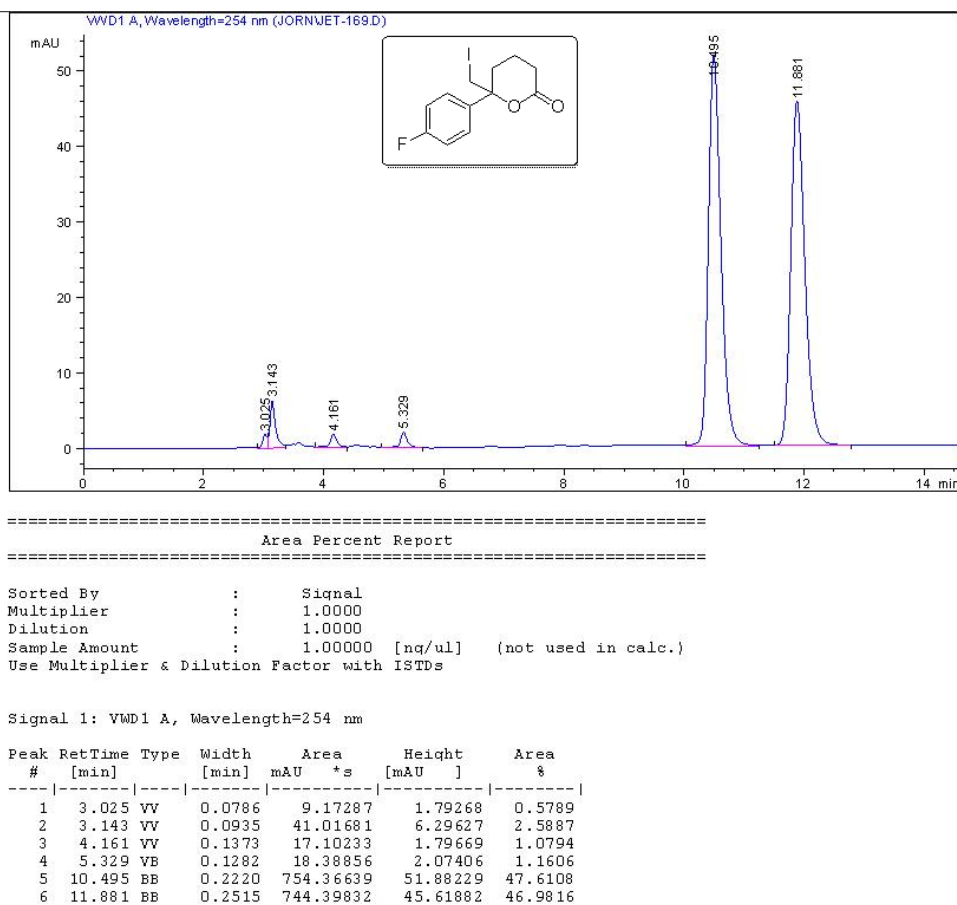

Figure S-88 HPLC chromatogram of racemic compound **2e**.

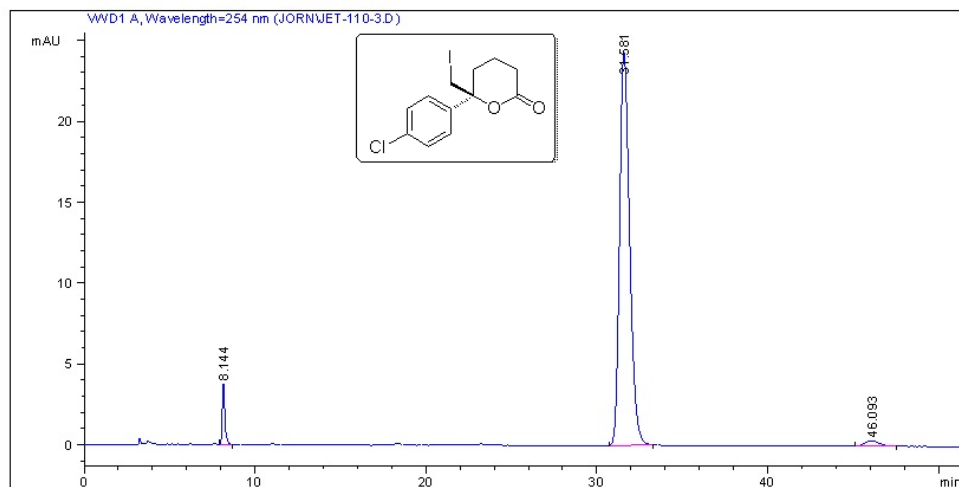

```

=====
                        Area Percent Report
=====

Sorted By      :      Signal
Multiplier     :      1.0000
Dilution       :      1.0000
Sample Amount   :      1.00000 [ng/ul]   (not used in calc.)
Use Multiplier & Dilution Factor with ISTDs
  
```

Signal 1: VWD1 A, Wavelength=254 nm

| Peak # | RetTime [min] | Type | Width [min] | Area mAU *s | Height [mAU] | Area %  |
|--------|---------------|------|-------------|-------------|--------------|---------|
| 1      | 8.144         | BB   | 0.1656      | 41.03710    | 3.74670      | 3.8829  |
| 2      | 31.581        | BB   | 0.6337      | 995.85950   | 24.30956     | 94.2282 |
| 3      | 46.093        | BB   | 0.7059      | 19.96289    | 3.35492e-1   | 1.8889  |

Totals : 1056.85949 28.39175

Figure S-89 HPLC chromatogram of chiral compound 2f.

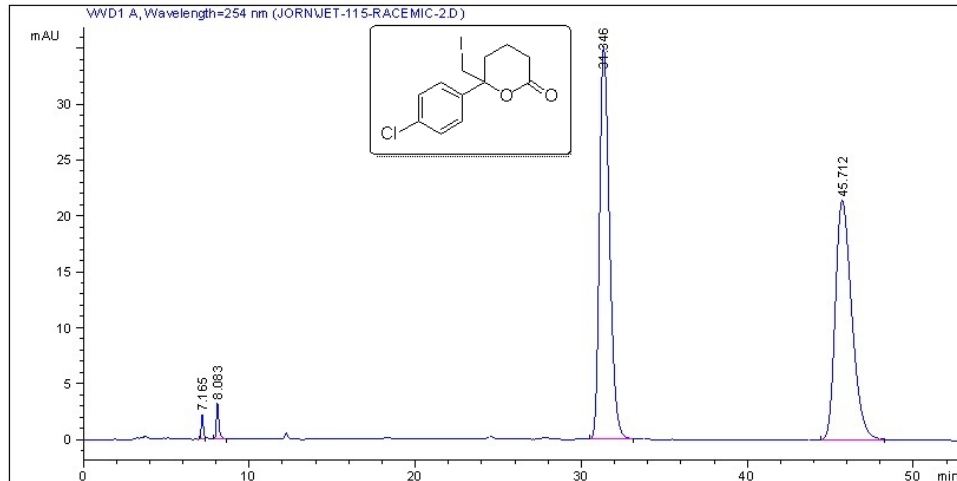

```

=====
                        Area Percent Report
=====

Sorted By      :      Signal
Multiplier     :      1.0000
Dilution       :      1.0000
Sample Amount   :      1.00000 [ng/ul]   (not used in calc.)
Use Multiplier & Dilution Factor with ISTDs
  
```

Signal 1: VWD1 A, Wavelength=254 nm

| Peak # | RetTime [min] | Type | Width [min] | Area mAU *s | Height [mAU] | Area %  |
|--------|---------------|------|-------------|-------------|--------------|---------|
| 1      | 7.165         | BV   | 0.1352      | 19.76059    | 2.23410      | 0.6601  |
| 2      | 8.083         | VB   | 0.1659      | 35.50255    | 3.23448      | 1.1859  |
| 3      | 31.346        | BB   | 0.6430      | 1468.44702  | 35.05751     | 49.0527 |
| 4      | 45.712        | BB   | 1.0581      | 1469.89929  | 21.38708     | 49.1012 |

Figure S-90 HPLC chromatogram of racemic compound 2f.

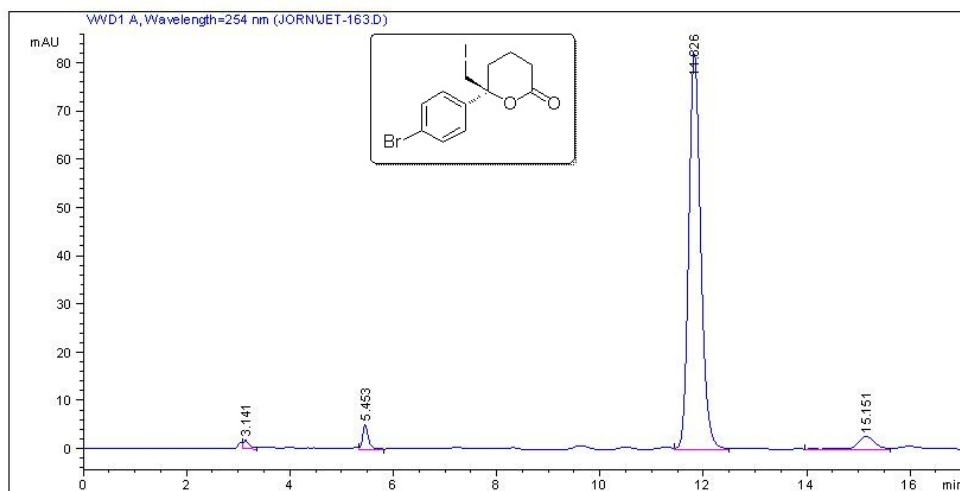

Area Percent Report

Sorted By : Signal  
Multiplier : 1.0000  
Dilution : 1.0000  
Sample Amount : 1.00000 [ng/ul] (not used in calc.)  
Use Multiplier & Dilution Factor with ISTDs

Signal 1: VWD1 A, Wavelength=254 nm

| Peak # | RetTime [min] | Type | Width [min] | Area mAU *s | Height [mAU] | Area %  |
|--------|---------------|------|-------------|-------------|--------------|---------|
| 1      | 3.141         | VV   | 0.1089      | 14.83858    | 1.83550      | 1.0290  |
| 2      | 5.453         | VV   | 0.1161      | 39.32522    | 5.10360      | 2.7271  |
| 3      | 11.826        | VV   | 0.2480      | 1324.15820  | 82.04984     | 91.8253 |
| 4      | 15.151        | VV   | 0.3620      | 63.71920    | 2.65011      | 4.4187  |

Totals : 1442.04120 91.63906

Figure S-91 HPLC chromatogram of chiral compound **2g**.

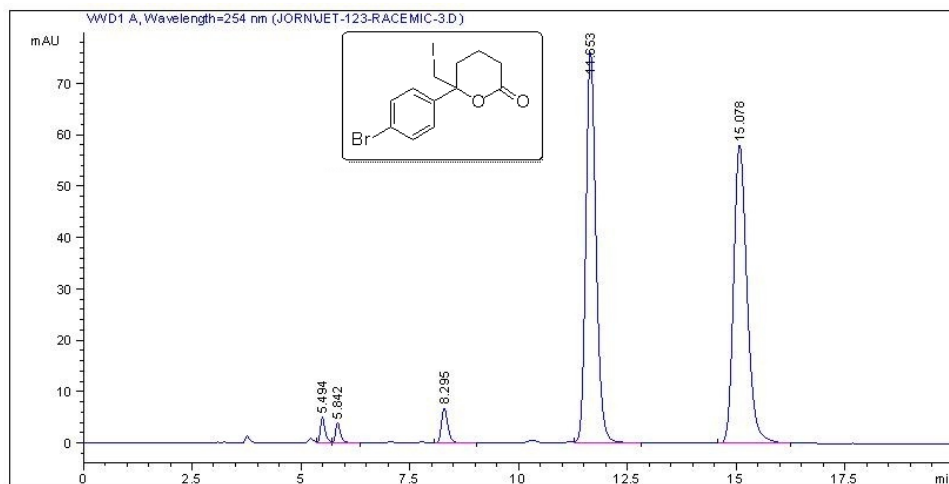

Area Percent Report

Sorted By : Signal  
Multiplier : 1.0000  
Dilution : 1.0000  
Sample Amount : 1.00000 [ng/ul] (not used in calc.)  
Use Multiplier & Dilution Factor with ISTDs

Signal 1: VWD1 A, Wavelength=254 nm

| Peak # | RetTime [min] | Type | Width [min] | Area mAU *s | Height [mAU] | Area %  |
|--------|---------------|------|-------------|-------------|--------------|---------|
| 1      | 5.494         | VV   | 0.1187      | 39.89697    | 5.03377      | 1.5198  |
| 2      | 5.842         | VB   | 0.1267      | 34.77424    | 4.03581      | 1.3247  |
| 3      | 8.295         | VB   | 0.1602      | 72.90378    | 6.87111      | 2.7771  |
| 4      | 11.653        | VB   | 0.2497      | 1239.67615  | 76.10136     | 47.2232 |
| 5      | 15.078        | VB   | 0.3273      | 1237.89148  | 58.07527     | 47.1552 |

Figure S-92 HPLC chromatogram of racemic compound **2g**.



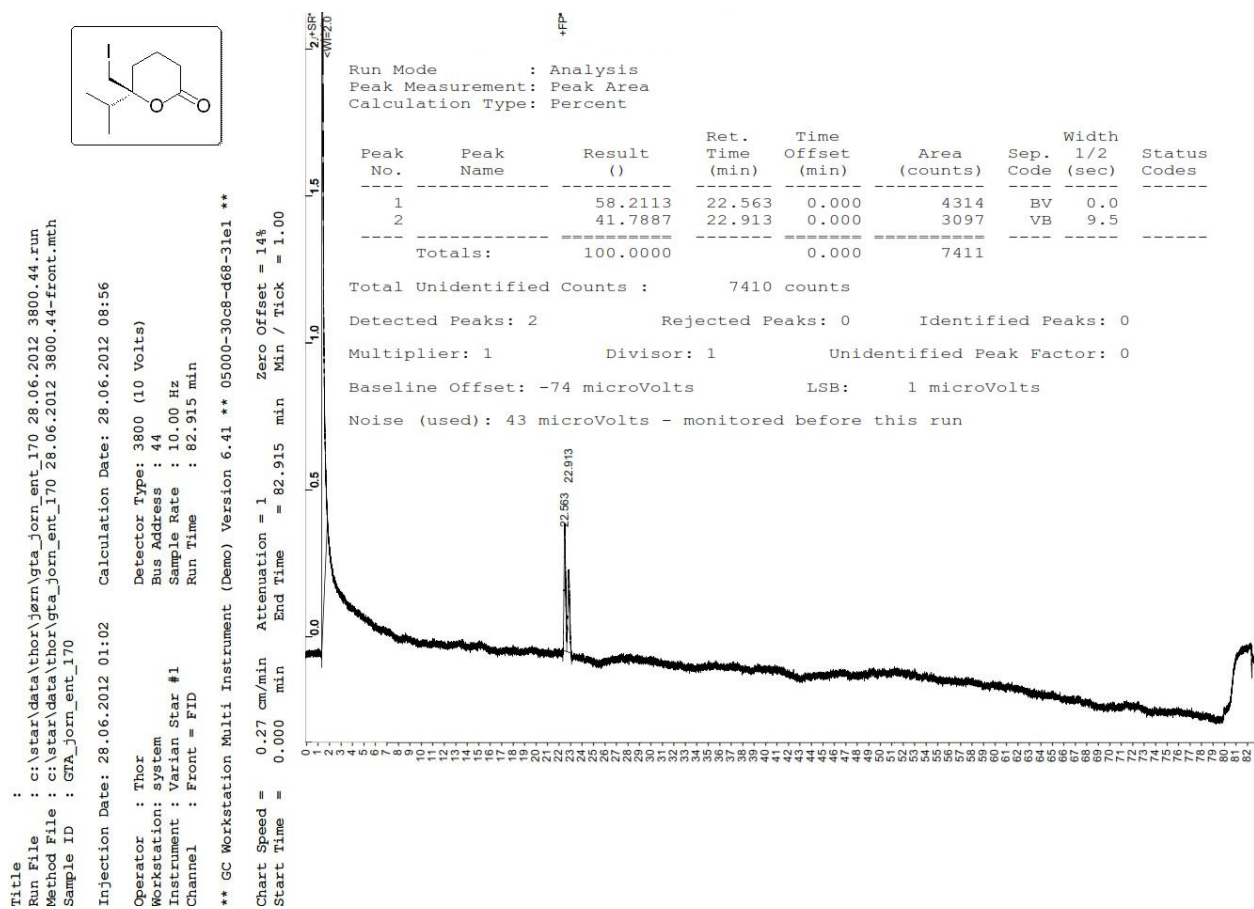

Figure S-93 GLC chromatogram of chiral compound 2h.

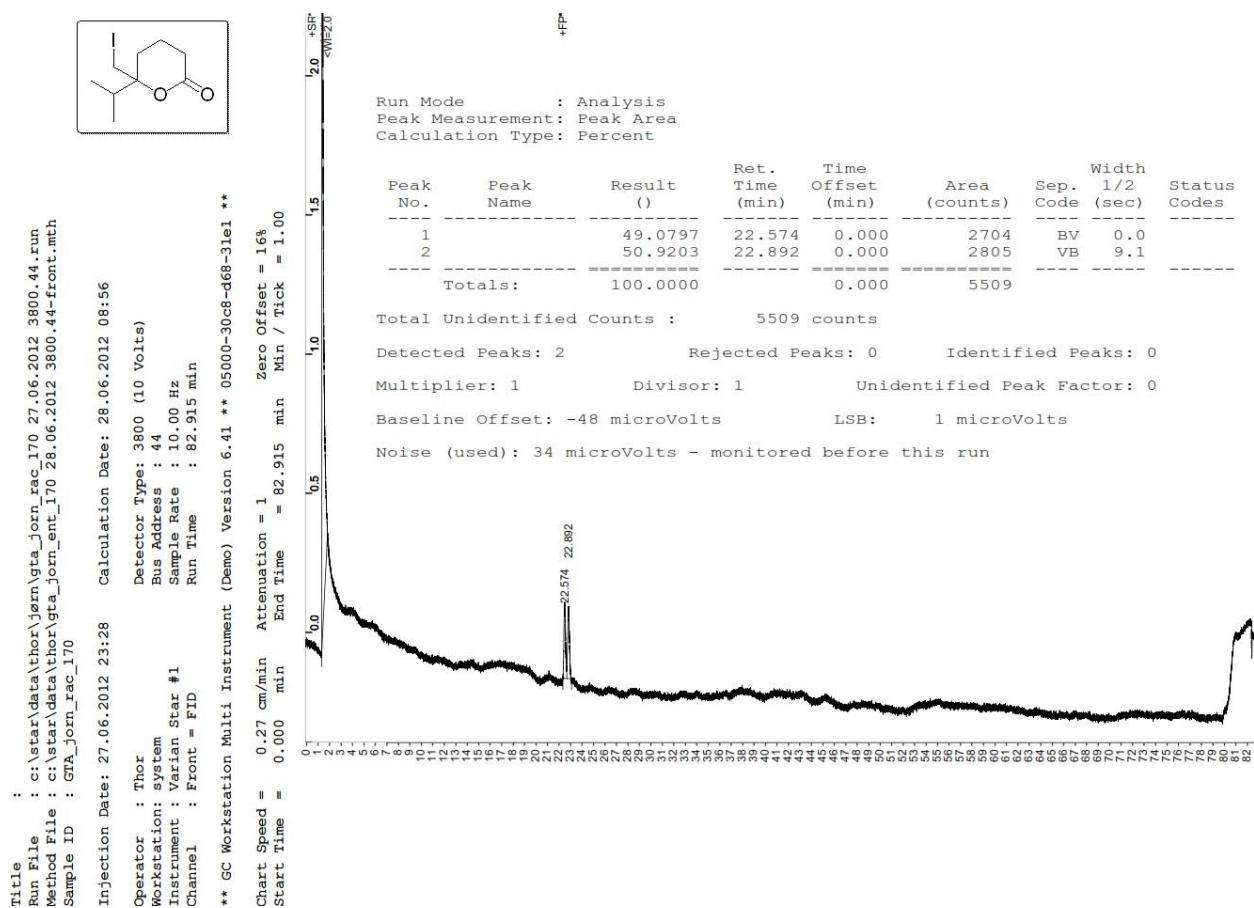

Figure S-94 GLC chromatogram of racemic compound 2h.

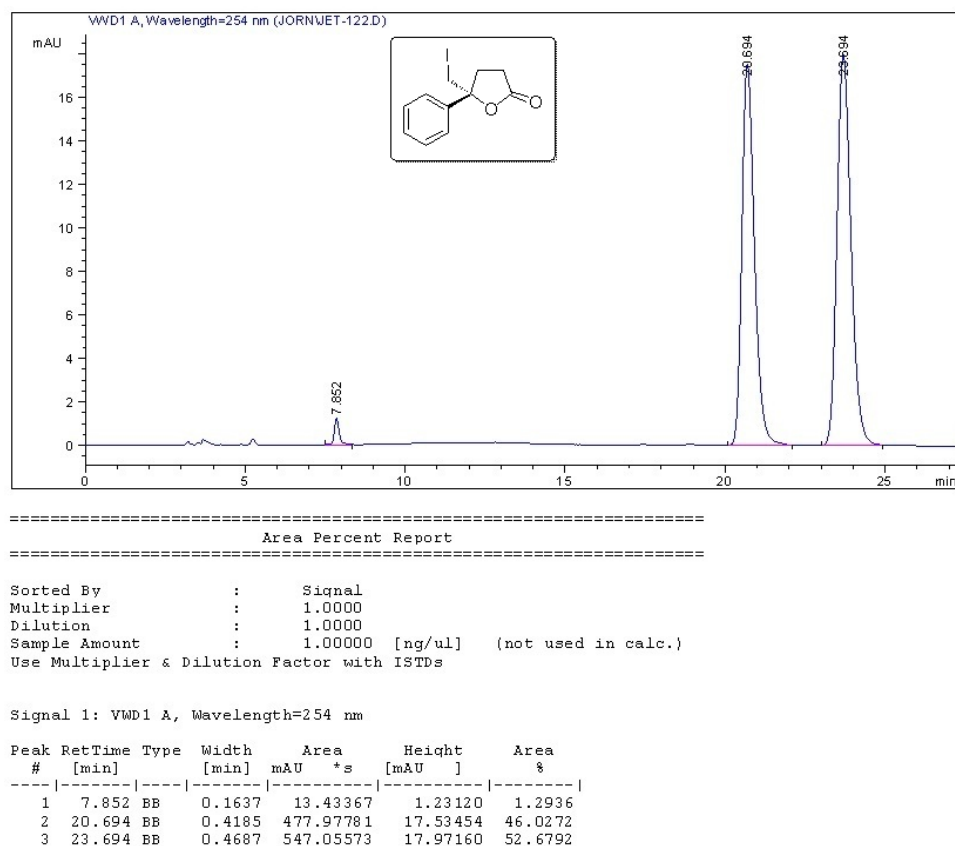

Figure S-95 HPLC chromatogram of chiral compound **4a**.

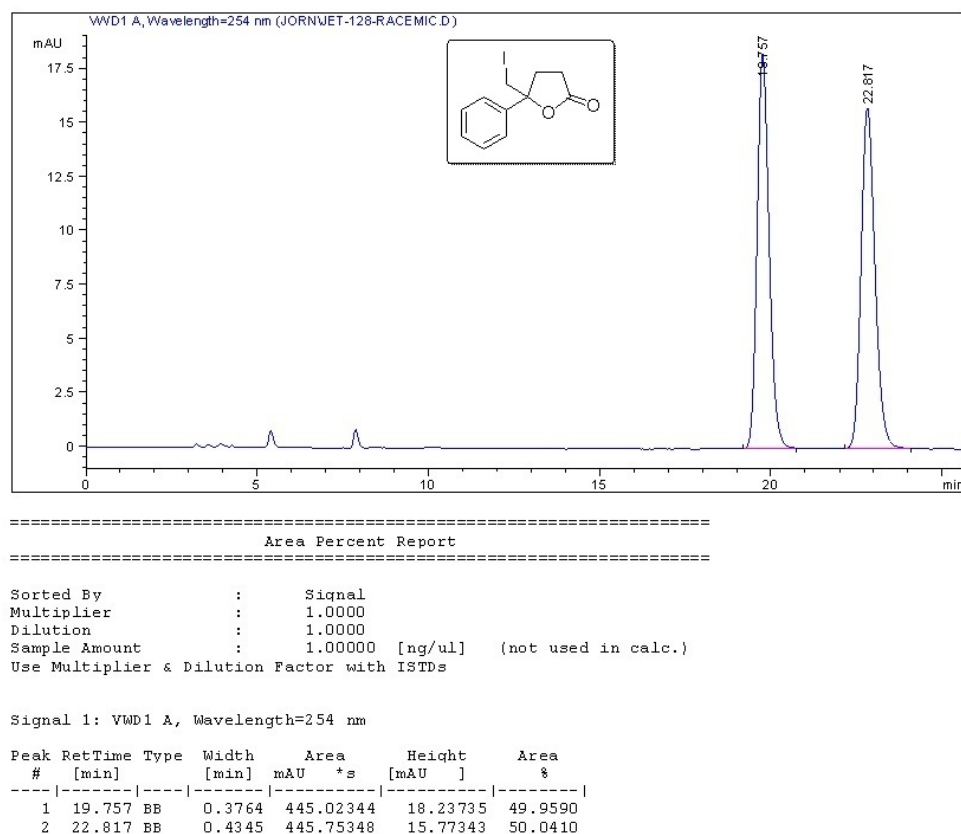

Figure S-96 HPLC chromatogram of racemic compound **4a**.

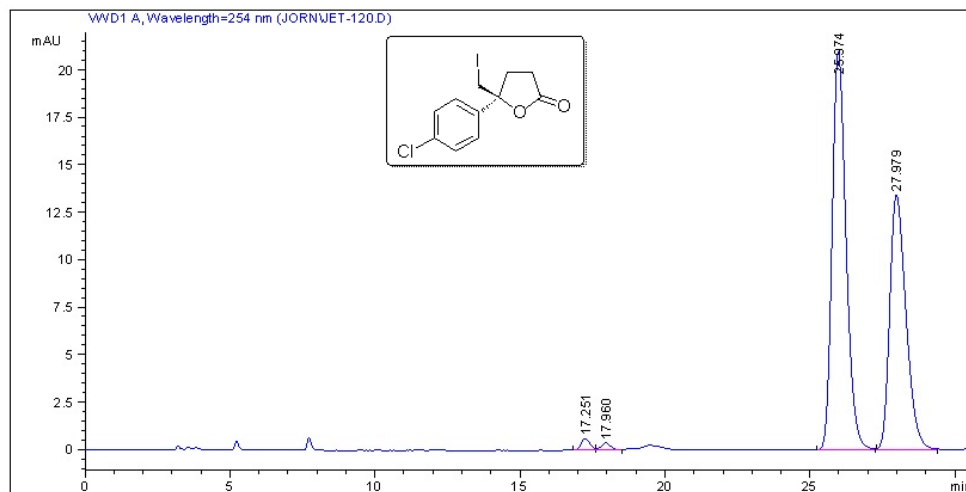

=====  
Area Percent Report  
=====

Sorted By : Signal  
Multiplier : 1.0000  
Dilution : 1.0000  
Sample Amount : 1.00000 [ng/ul] (not used in calc.)  
Use Multiplier & Dilution Factor with ISTDs

Signal 1: VWD1 A, Wavelength=254 nm

| Peak # | RetTime [min] | Type | Width [min] | Area mAU  | Height [mAU] | Area %  |
|--------|---------------|------|-------------|-----------|--------------|---------|
| 1      | 17.251        | BV   | 0.3300      | 13.05685  | 6.16798e-1   | 1.0500  |
| 2      | 17.960        | VV   | 0.3514      | 8.60201   | 3.69826e-1   | 0.6918  |
| 3      | 25.974        | BB   | 0.5148      | 699.29700 | 20.94307     | 56.2366 |
| 4      | 27.979        | BB   | 0.6003      | 522.53461 | 13.40707     | 42.0216 |

Figure S-97 HPLC chromatogram of chiral compound **4b**.

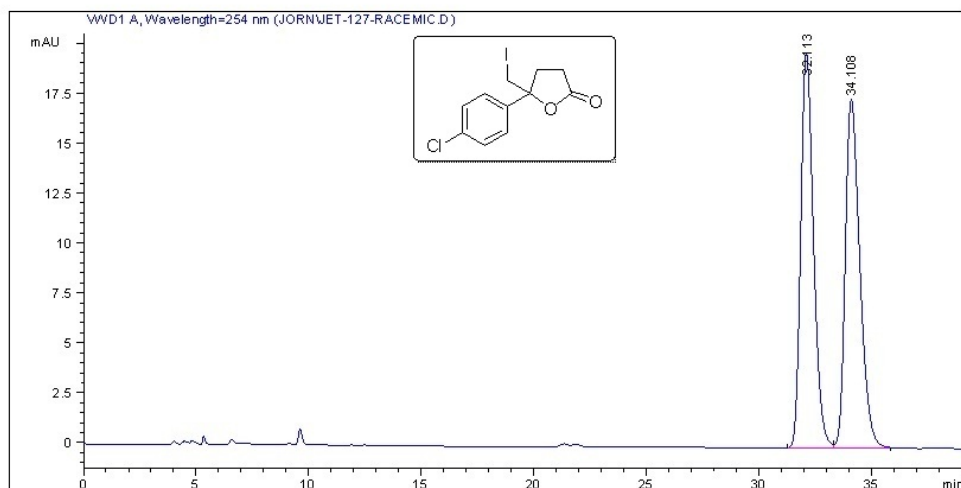

=====  
Area Percent Report  
=====

Sorted By : Signal  
Multiplier : 1.0000  
Dilution : 1.0000  
Sample Amount : 1.00000 [ng/ul] (not used in calc.)  
Use Multiplier & Dilution Factor with ISTDs

Signal 1: VWD1 A, Wavelength=254 nm

| Peak # | RetTime [min] | Type | Width [min] | Area mAU  | Height [mAU] | Area %  |
|--------|---------------|------|-------------|-----------|--------------|---------|
| 1      | 32.113        | BV   | 0.6062      | 777.20465 | 19.74822     | 49.8885 |
| 2      | 34.108        | VB   | 0.6869      | 780.67926 | 17.43519     | 50.1115 |

Figure S-98 HPLC chromatogram of racemic compound **4b**.

## References

- (1) Malerich, J. P.; Hagihara, K.; Rawal, V. H. *J. Am. Chem. Soc.* **2008**, *130*, 14416.
- (2) Konishi, H.; Lam, T. Y.; Malerich, J. P.; Rawal, V. H. *Org. Lett.* **2010**, *12*, 2028.
- (3) Zhu, Y.; Malerich, J. P.; Rawal, V. H. *Angew. Chem. Int. Ed.* **2010**, *49*, 153.
- (4) Veitch, G. E.; Jacobsen, E. N. *Angew. Chem., Int. Ed.* **2010**, *49*, 7332.
- (5) A. Takemiya, J. F. Hartwig, *J. Am. Chem. Soc.* **2006**, *128*, 6042.
- (6) Haas, J.; Piguel, S.; Wirth, T. *Org. Lett.* **2002**, *4*, 297.
- (7) For the antipodal (*R*)-enantiomer, see ref. 6.
